# Supplementary material for: Trimerization and cyclization of reactive P-functionalities confined within OCO pincers
Source: Royal Society of Chemistry journal article supplement (doi:10.1039/d1ra05926b), 2021-01-01
Supplement: d1ra05926b1.pdf [file d1ra05926b1.pdf]

Supporting Information for

## **Trimerization and Cyclization of Reactive P-Functionalities Confined Within OCO Pincers**

Beatrice L. Chinen,<sup>†</sup> Jakub Hyvl,<sup>†</sup> Daniel F. Brayton,<sup>†</sup> Matthew M. Riek,<sup>†</sup>  
Wesley Y. Yoshida,<sup>†</sup> Timothy W. Chapp,<sup>‡</sup> Arnold L. Rheingold,<sup>£</sup> and Matthew F. Cain<sup>\*,†</sup>

<sup>†</sup> Department of Chemistry, University of Hawai‘i at Mānoa, 2545 McCarthy Mall, Honolulu, Hawaii 96822, United States

<sup>‡</sup> Department of Chemistry, Allegheny College, 520 N. Main Street, Meadville, PA, United States 16335

<sup>£</sup> Department of Chemistry, University of California, San Diego, 9500 Gilman Drive, La Jolla, California 92093, United States

1. Experimentals and NMR Spectra for New Compounds (page S1-S43)
2. Simulated <sup>19</sup>F NMR Spectra using MestreNova (S44-S49)
3. Experimental Details for Crystal Structure Refinement and Acquisition (S50 – S114)

## 1. Experimentals and NMR Spectra for New Compounds:

### General Experimental Details.

Unless otherwise specified, all reactions were performed under an atmosphere of nitrogen in an MBraun or Vacuum Atmospheres glovebox or using standard Schlenk techniques. All glassware was dried overnight in an oven at 140 °C prior to use. Solvents used in the glove box were purchased directly from chemical suppliers (Aldrich or Acros), pumped directly into the glove box, and stored over oven-activated 4 or 5 Å molecular sieves (Aldrich). Solvents used outside the glove box were purged with N<sub>2</sub> for 30 min and stored over molecular sieves. TMSF<sub>3</sub> was dried by cryogenic transfer. <sup>1</sup>H, <sup>13</sup>C{<sup>1</sup>H}, <sup>19</sup>F, and <sup>31</sup>P{<sup>1</sup>H} NMR spectra were recorded on a Varian Mercury-300 (300/75/282/121 MHz), Varian Unity Inova-500 (500/126/470/202 MHz), or Agilent 600 DD2 (600/151/565/243 MHz) spectrometer at ambient temperature. Chemical shifts are reported in ppm downfield of tetramethylsilane using the solvent as internal standard (<sup>1</sup>H CDCl<sub>3</sub> = 7.27 ppm, <sup>1</sup>H C<sub>6</sub>D<sub>6</sub> = 7.16 ppm, <sup>13</sup>C CDCl<sub>3</sub> = 77.16 ppm, <sup>13</sup>C C<sub>6</sub>D<sub>6</sub> = 128.06 ppm). Multiplicities are abbreviated as br (broad), s (singlet), d (doublet), t (triplet), q (quartet), or m (multiplet). Coupling constants (*J*) are reported in Hertz (Hz). Flash column chromatography was performed on silica gel (40-63 μm, SiliCycle). High-resolution mass spectrometry (HRMS) was recorded on an Agilent 6545 LC-MS Q-ToF spectrometer (NSF-1532310). Dimethyl 2-bromoisophthalate and [Me<sub>4</sub>N][F] were synthesized according to the published procedures listed below.<sup>1,2</sup> All other chemicals were used as received, unless otherwise noted.

---

<sup>1</sup> Courchay, F.C.; Sworen, J.C.; Ghiviriga, I.; Abboud, K.A.; Wagener, K.B. Understanding Structural Isomerization during Ruthenium-Catalyzed Olefin Metathesis: A Deuterium Labeling Study. *Organometallics* **2006**, *25*, 6074-6086.

<sup>2</sup> Kolomeitsev, A.A.; Seifert, F.U.; Roeschenthaler, G.-V. Simple Preparation of Difluorophosphoranes Using Anhydrous Zinc and Tetramethylammonium Fluorides. *J. Fluorine Chem.* **1995**, *71* (1), 47-49.

## Synthesis of **1**.

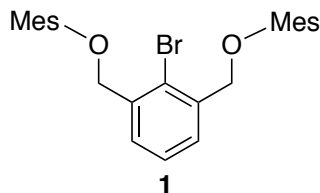

In the glovebox, 2,4,6-trimethylphenol (3.00 g, 22.03 mmol, 2.5 equiv.) was dissolved in THF (100 mL), and a 1.6 M solution of *n*-BuLi in hexanes (13.0 mL, 20.8 mmol, 2.3 equiv.) was added dropwise at room temperature. The reaction mixture was stirred for 15 min. Subsequently, tribromide **D** (3.086 g, 9.0 mmol) was added to the stirred solution, and the reaction mixture was transferred to a Schlenk bomb equipped with a Teflon screw cap and heated at 100 °C for 1 d. The volatiles were then removed under reduced pressure, and the crude residue was extracted with a toluene:hexane mixture (1:1, 3 x 15 mL). The combined extracts were filtered through a Celite plug, and the filtrate was concentrated under vacuum then purified by column chromatography (silica gel, toluene:hexane 1:1,  $R_f$  = 0.63). The title product (2.64 g, 5.822 mmol) was obtained as white plates in 65% yield. X-Ray quality crystals were obtained by slow evaporation from a concentrated solution of **1** in *n*-hexanes.

Anal. Calcd for  $C_{26}H_{29}BrO_2$ : C, 68.87; H, 6.45. Found: C, 68.77; H, 6.27.  $^1H$  NMR (500 MHz,  $CDCl_3$ ):  $\delta$  7.78 (d,  $J$  = 7.6 Hz, 2H, Ar), 7.51 (t,  $J$  = 7.6 Hz, 1H, Ar), 6.89 (s, 4H, Ar), 4.93 (s, 4H,  $CH_2$ ), 2.30 (s, 12H, Me), 2.29 (s, 6H, Me).  $^{13}C\{^1H\}$  NMR (126 MHz,  $CDCl_3$ ):  $\delta$  153.5 (Ar), 137.8 (Ar), 133.6 (Ar), 130.9 (Ar), 129.6 (Ar), 127.9 (Ar), 127.7 (Ar), 121.6 (Ar), 73.3 ( $CH_2$ ), 20.9 ( $CH_3$ ), 16.4 ( $CH_3$ ).

$^1\text{H}$  NMR Spectrum of **1**

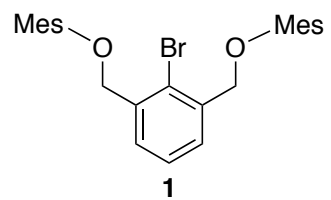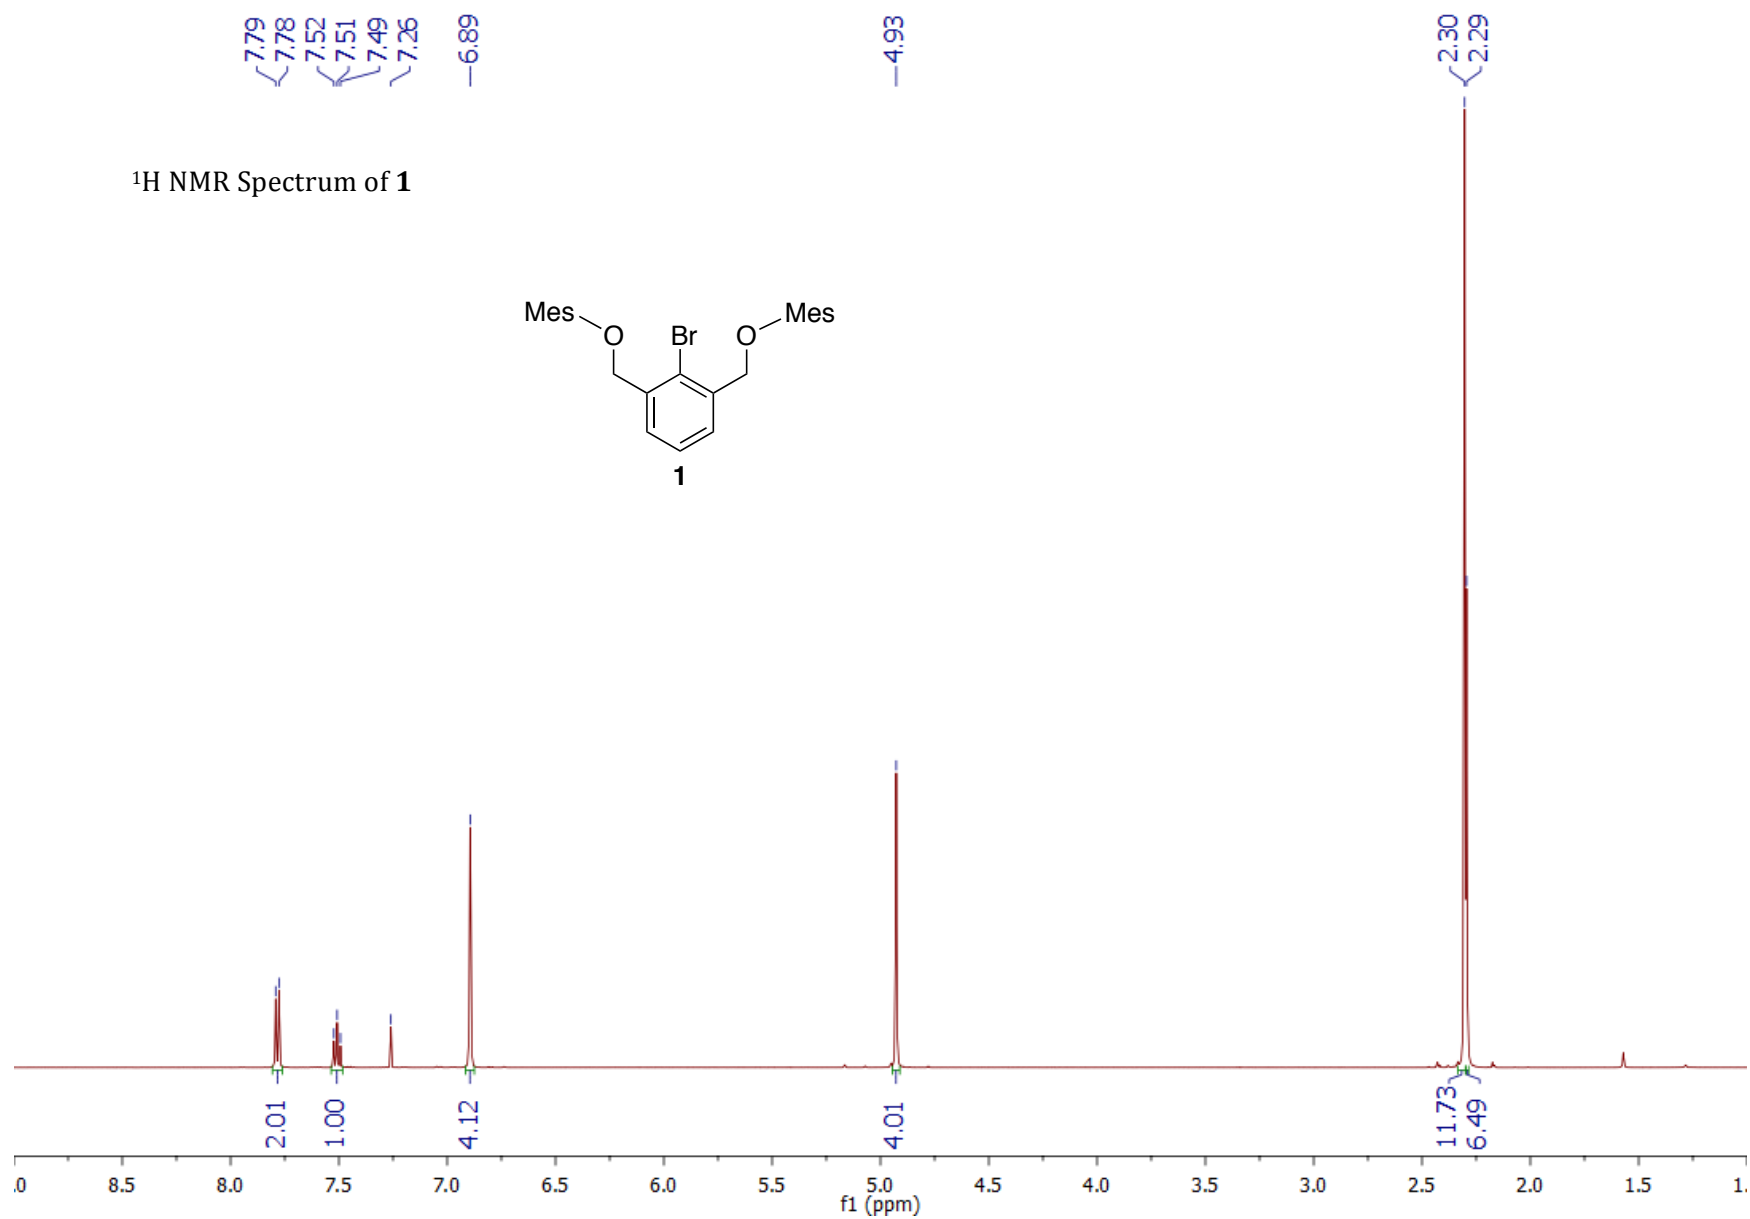

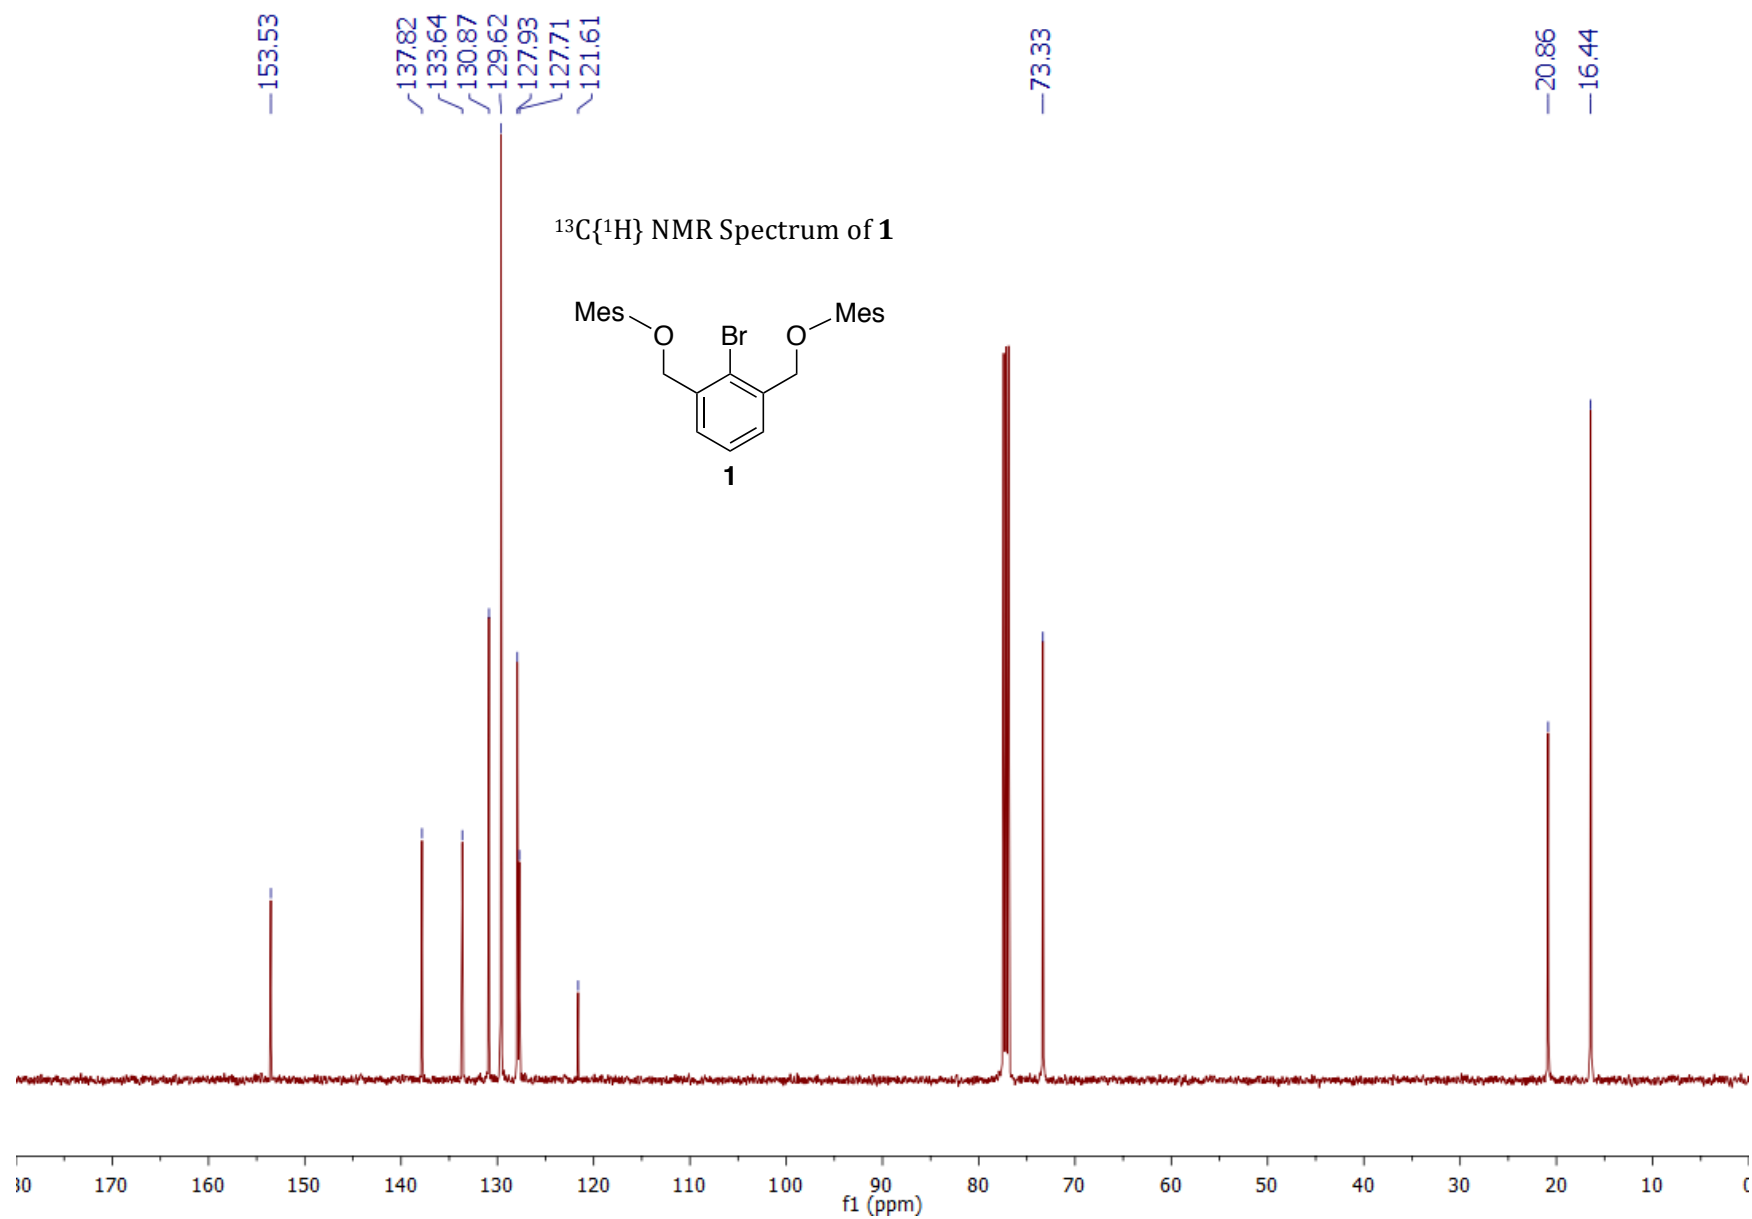

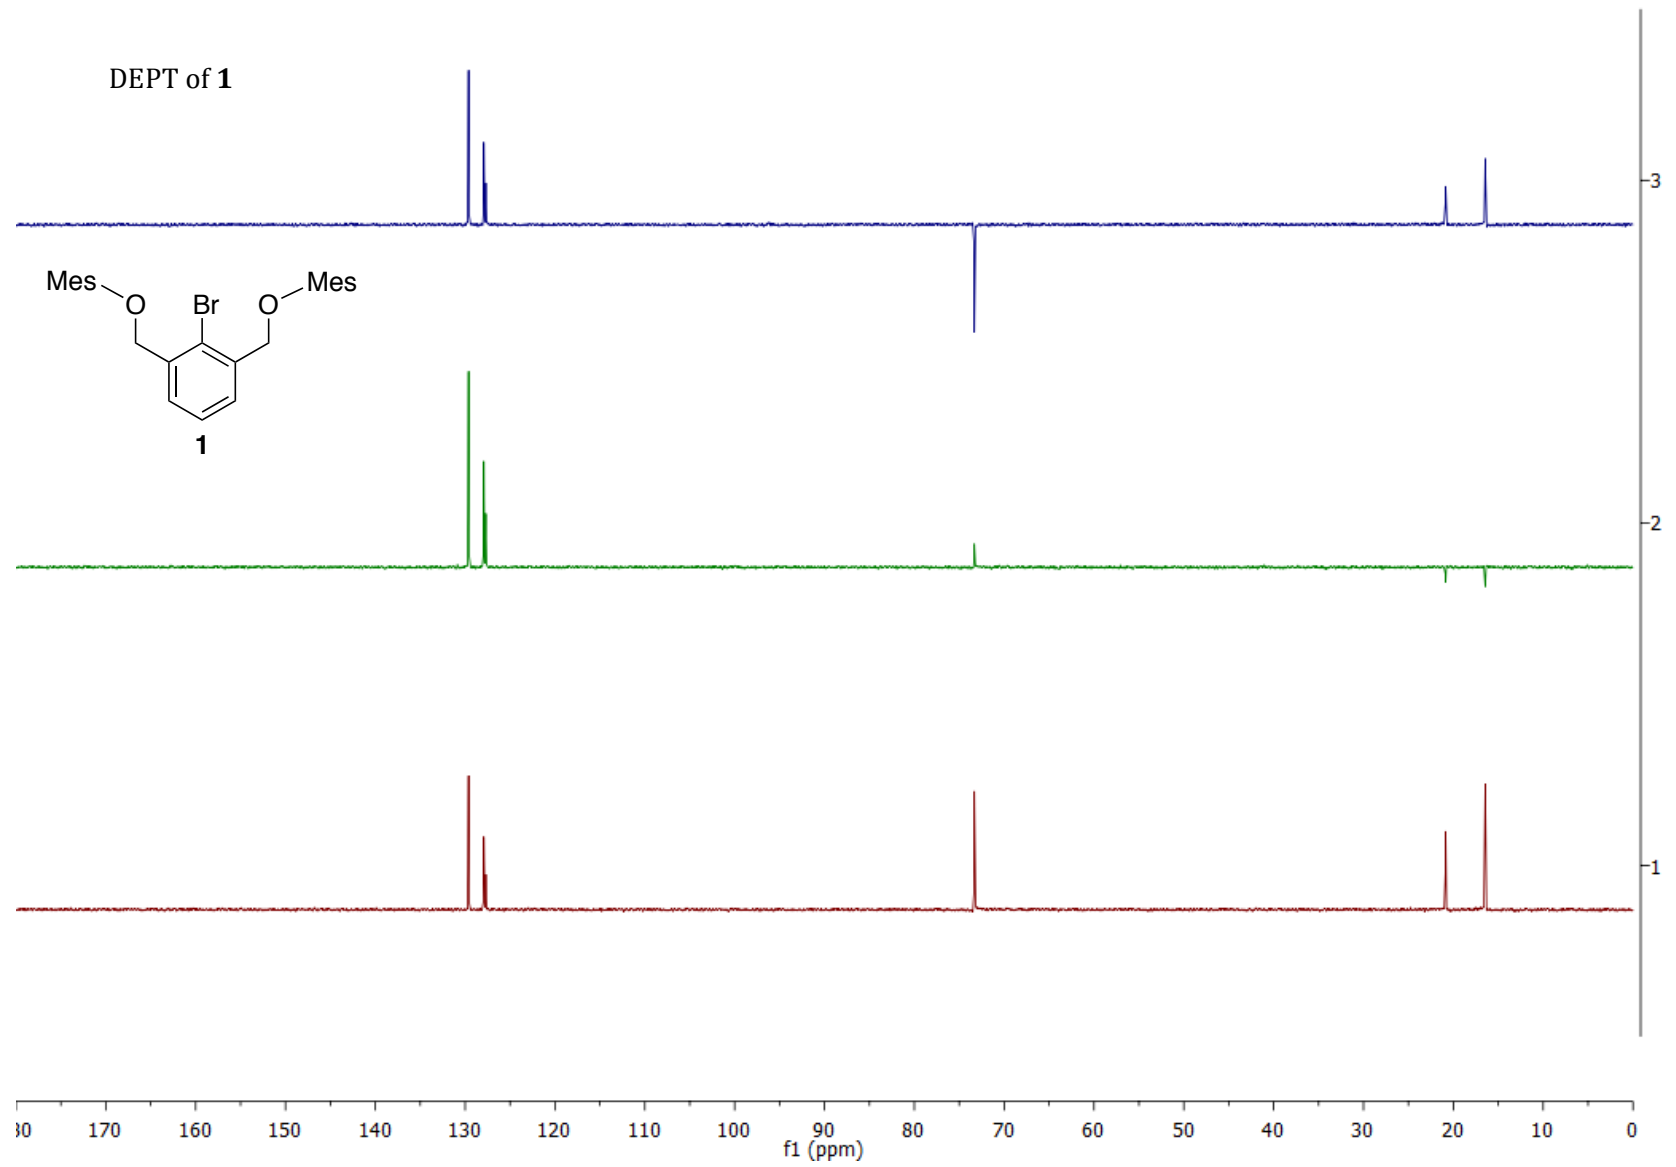

CENTC Elemental Analysis Facility  
University of Rochester  
Rochester, NY 14627 USA  
Email: ealab@chem.rochester.edu

**Date of report** 6/2/2017 8:22:15PM

**User ID** Administrator

**Comments** JH154 [ Cain / Hyl ]

DATE & TIME 6/2/2017 1:56:40 PM  
SAMPLE ID 17305D  
WEIGHT (mg) 2.082

P\_ID EA LAB  
USER ID Administrator  
MODE CHN

CARBON 68.768%  
HYDROGEN 6.267%  
NITROGEN 0.0%

DATE & TIME 6/2/2017 1:50:38 PM  
SAMPLE ID 17305  
WEIGHT (mg) 2.012

CARBON 68.781%  
HYDROGEN 6.166%  
NITROGEN 0.092%

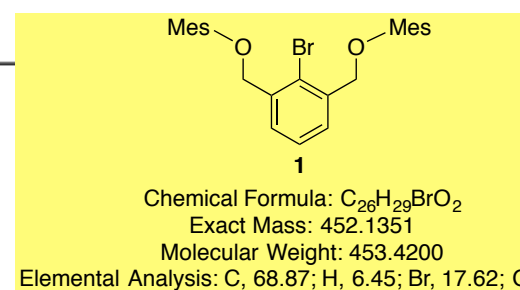

#### Acknowledgment

Analytical data were obtained from the CENTC Elemental Analysis Facility at the University of Rochester, funded by NSF CHE-0650456.

#### Instrumentation

Microanalysis samples were weighed with a PerkinElmer Model AD-6 Autobalance and their compositions were determined with a PerkinElmer 2400 Series II Analyzer.

## Synthesis of 2, Its “Half” Trifluoromethylated Derivative, and Diol E:

### Synthesis of “Half” Trifluoromethylated.

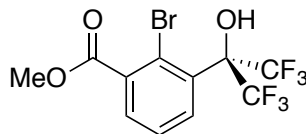

Initial attempts to prepare diol **E** (via its recently reported literature prep<sup>3</sup>) using six equiv of Ruppert’s reagent (TMSCF<sub>3</sub>) and four equiv of [Me<sub>4</sub>N][F] yielded a mixture of trifluoromethylated products; the “half” trifluoromethylated derivative could be isolated cleanly in low yield.

In the glovebox, dimethyl 2-bromoisophthalate (4.40 g, 16.1 mmol) and [Me<sub>4</sub>N][F] (6.00 g, 64.4 mmol, 4 equiv.) were suspended in DME (65 mL) in a Schlenk bomb with a stir bar. The bomb was taken out of the glove box, placed on the Schlenk line, and cooled to -40 °C in a dry ice/acetonitrile bath. TMSCF<sub>3</sub> (9.52 mL, 64.4 mmol, 4 equiv.) was injected *via* syringe through a rubber septum, and the mixture was stirred at -40 °C for 4 h. A second aliquot of TMSCF<sub>3</sub> (4.76 mL, 32.2 mmol, 2 equiv.) was injected in a similar fashion, and the mixture was stirred at -40 °C for another 6 h. After warming to room temperature, NH<sub>4</sub>Cl (*aq*) was added at 0 °C, and the mixture was extracted with toluene (3 x 50 mL). The combined organic layers were washed with water then brine, dried over MgSO<sub>4</sub>, filtered, and the filtrate was concentrated under vacuum. The crude product mixture was purified by column chromatography with DCM/hexanes (1:2) as the eluent. The pure fractions were recrystallized from dichloromethane (8 mL) layered with hexanes (50 mL) at 4 °C. The colorless precipitate was filtered and rinsed with cold pentane (40 mL), affording crystals suitable for X-ray diffraction (0.24 g, 0.49 mmol, 3%).

Anal. Calcd for C<sub>11</sub>H<sub>7</sub>BrF<sub>6</sub>O<sub>3</sub>: C, 34.67; H, 1.85. Found: C, 34.76; H, 1.57. <sup>1</sup>H NMR (500 MHz, CDCl<sub>3</sub>): δ 7.81 (br d, *J* = 15 Hz, 1H, Ar), 7.60 (dd, *J* = 5, 15 Hz, 1H, Ar), 7.50 (t, *J* = 15 Hz, 1H, Ar), 5.34 (br s, 1H, OH), 3.99 (s, 3H, Me). <sup>13</sup>C NMR (126 MHz, CDCl<sub>3</sub>): δ 138.9 (Ar), 132.1 (Ar), 130.9 (Ar), 128.7 (Ar), 127.6 (Ar), 122.4 (q, *J* = 290 Hz, CF<sub>3</sub>), 118.0 (Ar), 53.1 (Me), the quaternary carbon and C=O were not observed. <sup>19</sup>F NMR (470 MHz, CDCl<sub>3</sub>): δ -73.2 (s).

<sup>3</sup> Y. Imada, T. Kukita, H. Nakano and Y. Yamamoto, *Bull. Chem. Soc. Jpn.*, 2016, **89**, 546-548.



# <sup>1</sup>H NMR (300 MHz, CDCl<sub>3</sub>) spectrum

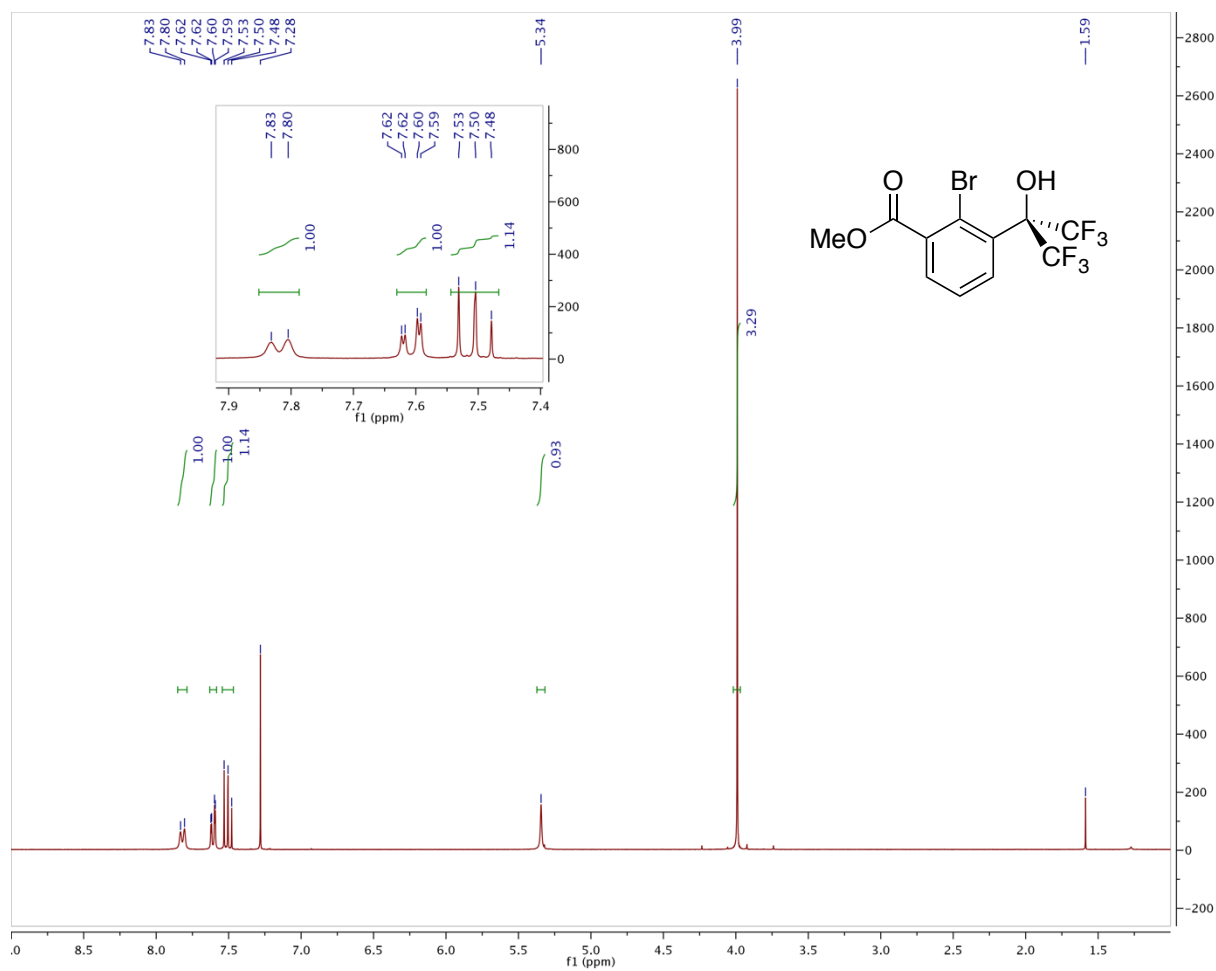

**$^{13}\text{C}$  NMR (126 MHz,  $\text{CDCl}_3$ ) spectrum**  
(inset displays  $\text{CF}_3$  quartet)

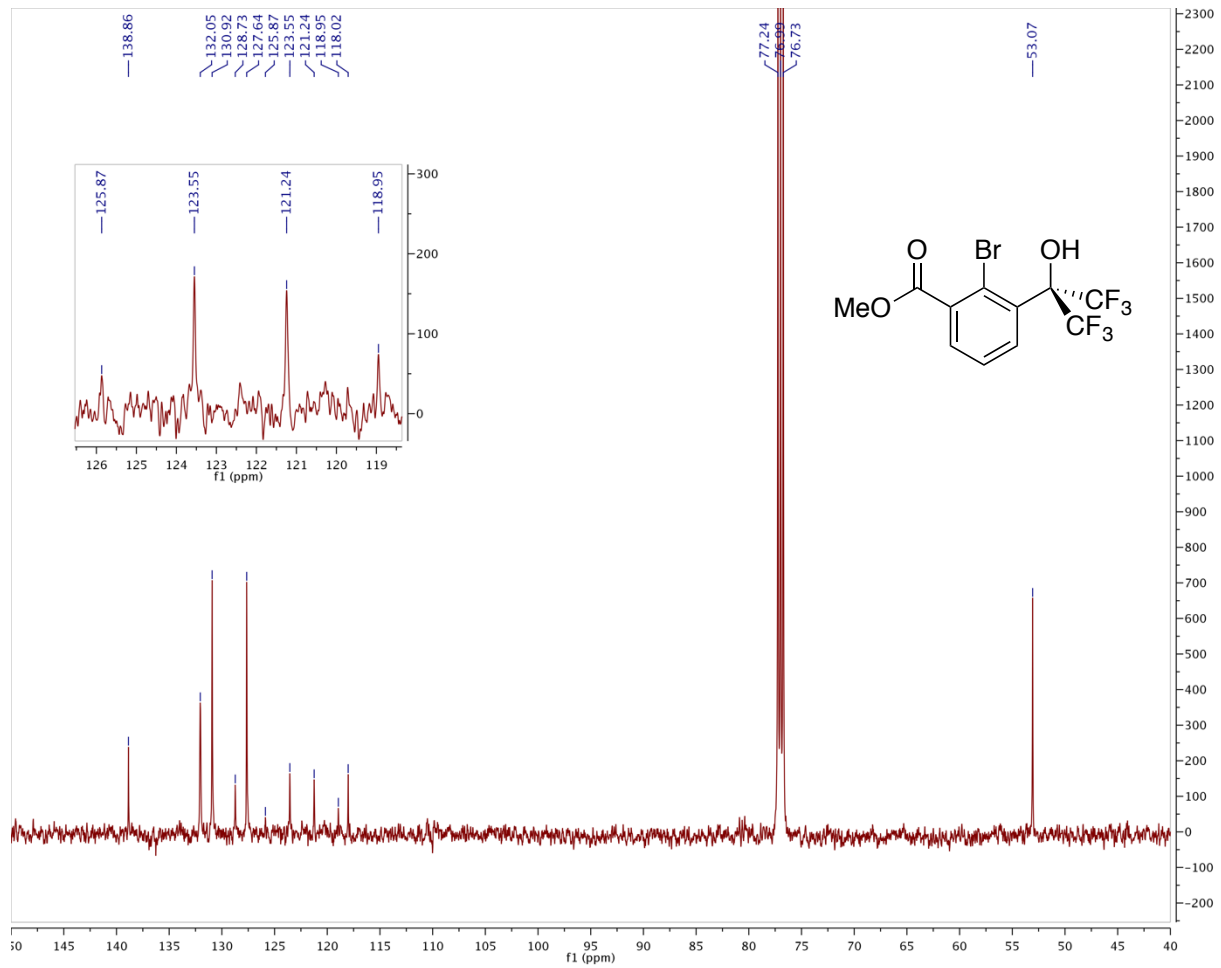

**<sup>19</sup>F NMR (282 MHz, CDCl<sub>3</sub>) spectrum**

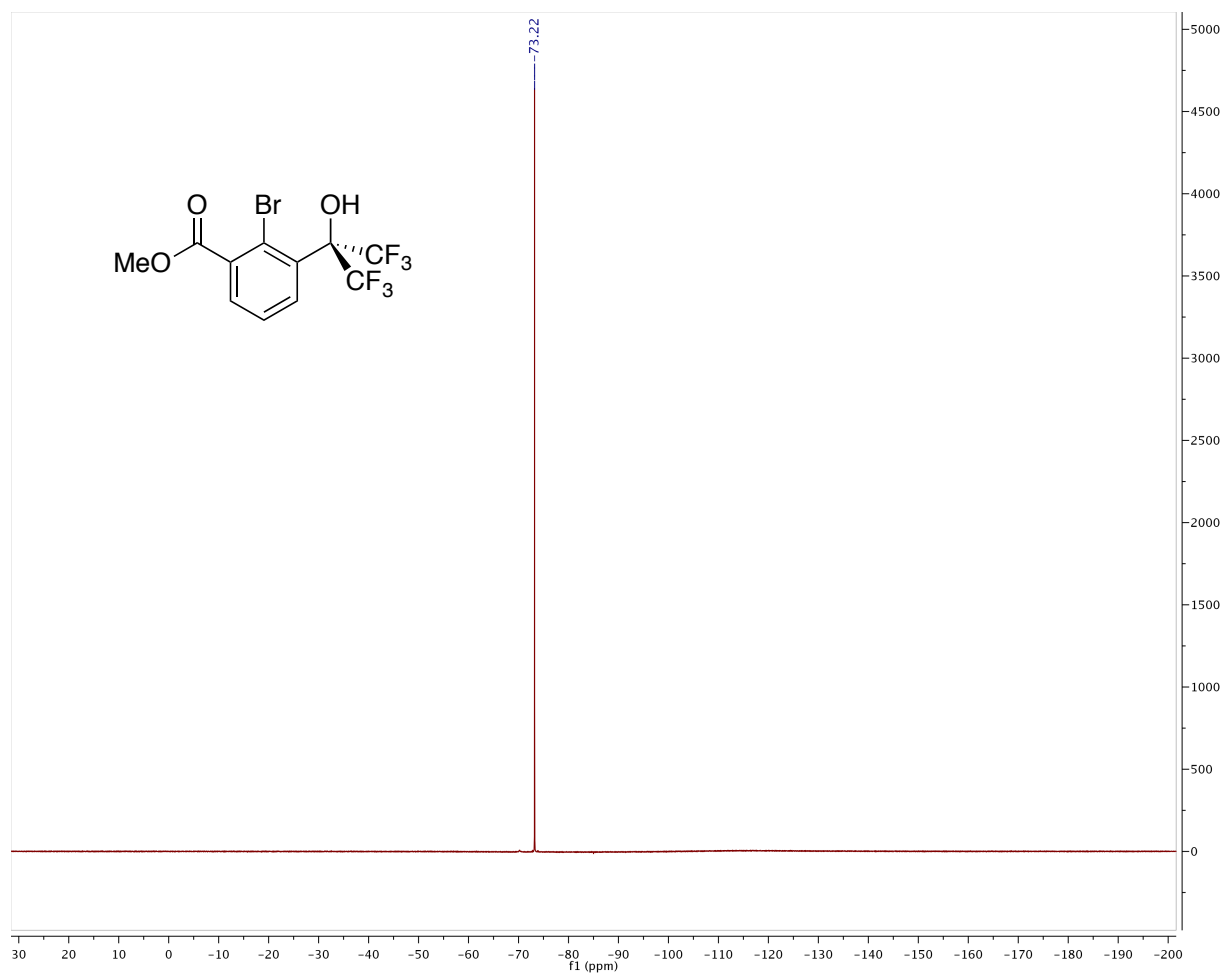

CENTC Elemental Analysis Facility  
University of Rochester  
Rochester, NY 14627 USA  
Email: ealab@chem.rochester.edu

|                       |                       |
|-----------------------|-----------------------|
| <b>Date of report</b> | 5/31/2019 4:51:42PM   |
| <b>User ID</b>        | Administrator         |
| <b>Comments</b>       | B23 [ Cain / Chinen ] |

|             |                      |         |               |
|-------------|----------------------|---------|---------------|
| DATE & TIME | 5/31/2019 2:28:33 PM | P_ID    | EA LAB        |
| SAMPLE ID   | 19329                | USER ID | Administrator |
| WEIGHT (mg) | 1.971                | MODE    | CHN           |

|          |         |
|----------|---------|
| CARBON   | 34.759% |
| HYDROGEN | 1.571%  |
| NITROGEN | 0.024%  |

#### Acknowledgment

Analytical data were obtained from the CENTC Elemental Analysis Facility at the University of Rochester, funded by NSF CHE-0650456.

#### Instrumentation

Microanalysis samples were weighed with a PerkinElmer Model AD6000 Autobalance and their compositions were determined with a PerkinElmer 2400 Series II Analyzer.

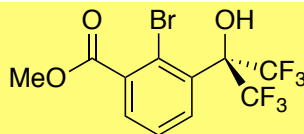

Chemical Formula: C<sub>11</sub>H<sub>7</sub>BrF<sub>6</sub>O<sub>3</sub>  
Exact Mass: 379.9483  
Molecular Weight: 381.0684  
Elemental Analysis: C, 34.67; H, 1.85; Br, 20.97; F, 29.91; O, 12.60

## Synthesis of Diol **E**.

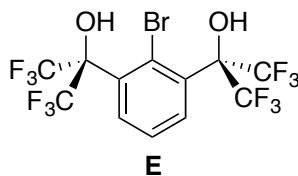

In order to access diol **E**, the published prep<sup>4</sup> had to be modified. Specifically, a large excess of  $\text{TMSCF}_3$  was required, and the solvent was changed from DME to DMF.

In the glovebox, dimethyl 2-bromoisophthalate (3.20 g, 11.7 mmol) and  $[\text{Me}_4\text{N}][\text{F}]$  (21.83 g, 234.4 mmol, 20 equiv.) were dissolved in DMF (300 mL) in a Schlenk flask with a stir bar. The flask was taken out of the glove box, placed on the Schlenk line, and fitted with an air-free addition funnel under positive  $\text{N}_2$  pressure. The flask was cooled to  $-40\text{ }^\circ\text{C}$  in a dry ice/acetonitrile bath with vigorous stirring.  $\text{TMSCF}_3$  (34.6 mL, 234 mmol, 20 equiv.) was transferred to the addition funnel *via* cannula and added dropwise to the Schlenk flask over several min. The mixture was stirred at  $-40\text{ }^\circ\text{C}$  for 4 h then another dose of  $\text{TMSCF}_3$  (17.3 mL, 117 mmol, 10 equiv.) was added in the same manner. The mixture was stirred overnight at  $-40\text{ }^\circ\text{C}$ , warmed to RT, and stirred for an additional 1 h.  $\text{NH}_4\text{Cl}$  (aq) was added at  $0\text{ }^\circ\text{C}$ , and the reaction mixture was extracted with toluene (3 x 50 mL). The combined organic layers were washed with water, brine, dried over  $\text{MgSO}_4$ , filtered, and the filtrate was concentrated under vacuum. The resulting yellow oil was purified by column chromatography using  $\text{Et}_2\text{O}/n\text{-hexane}$  (1:2) as the eluent to give pale yellow solid **7** (4.67 g, 9.55 mmol, 82%). The  $^1\text{H}$ ,  $^{13}\text{C}\{^1\text{H}\}$ , and  $^{19}\text{F}$  NMR spectra were consistent with the published report,<sup>4</sup> but a slight impurity at 3.99 ppm in the  $^1\text{H}$  NMR spectrum persisted.

---

<sup>4</sup> Y. Imada, T. Kukita, H. Nakano and Y. Yamamoto, *Bull. Chem. Soc. Jpn.*, 2016, **89**, 546-548.

## Synthesis of 2.

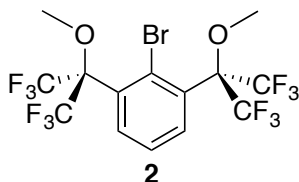

Diol **E** (3.61 g, 7.38 mmol) and DMF (180 mL) were combined in a Schlenk flask with a stir bar. The solution was purged with N<sub>2</sub> on the Schlenk line for 30 min, then K<sub>2</sub>CO<sub>3</sub> (5.10 g, 36.9 mmol, 5 equiv.) was added with stirring under positive N<sub>2</sub> pressure. Next, MeI (2.30 mL, 36.9 mmol, 5 equiv.) was injected *via* syringe, and the reaction mixture was stirred overnight, then quenched with NH<sub>4</sub>Cl (*aq*) and extracted with toluene (3 x 50 mL). The combined organic layers were washed with water, brine, dried over MgSO<sub>4</sub>, filtered, and the filtrate concentrated under vacuum, resulting in pale yellow solid **2** (2.97 g, 5.74 mmol, 78%). Recrystallization from acetonitrile (8 mL) at 4 °C afforded crystals suitable for X-ray diffraction.

Anal. Calcd for C<sub>14</sub>H<sub>9</sub>BrO<sub>2</sub>F<sub>12</sub>: C, 32.52; H, 1.75. Found: C, 32.71; H, 1.77. <sup>1</sup>H NMR (500 MHz, CDCl<sub>3</sub>): δ 7.76 (d, *J* = 10 Hz, 2H, Ar), 7.51 (t, *J* = 10 Hz, 1H, Ar), 3.52 (s, 6H, Me). <sup>13</sup>C{<sup>1</sup>H} NMR (151 MHz, CDCl<sub>3</sub>): δ 134.1 (Ar), 129.6 (Ar), 127.0 (Ar), 123.5 (Ar), 122.4 (q, *J* = 290 Hz, CF<sub>3</sub>), 86.5 (septet, *J* = 29 Hz, C(CF<sub>3</sub>)<sub>2</sub>), 54.8 (OMe). <sup>19</sup>F NMR (471 MHz, CDCl<sub>3</sub>): δ -66.9 (s).

# <sup>1</sup>H NMR (500 MHz, CDCl<sub>3</sub>) spectrum

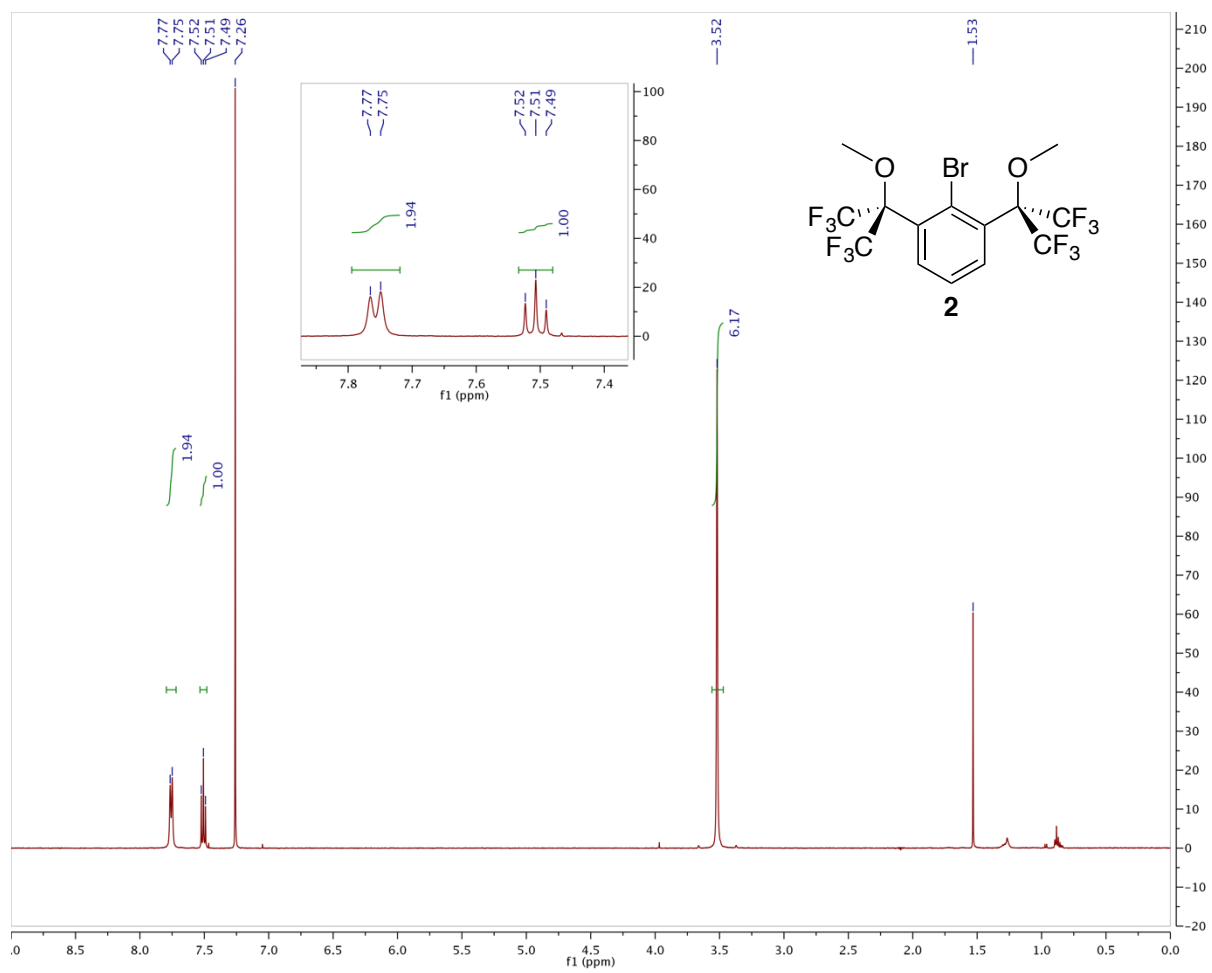

**$^{13}\text{C}\{^1\text{H}\}$  NMR (151 MHz,  $\text{CDCl}_3$ ) spectrum**  
(insets display  $\text{CF}_3$  quartet and quaternary carbon atoms)

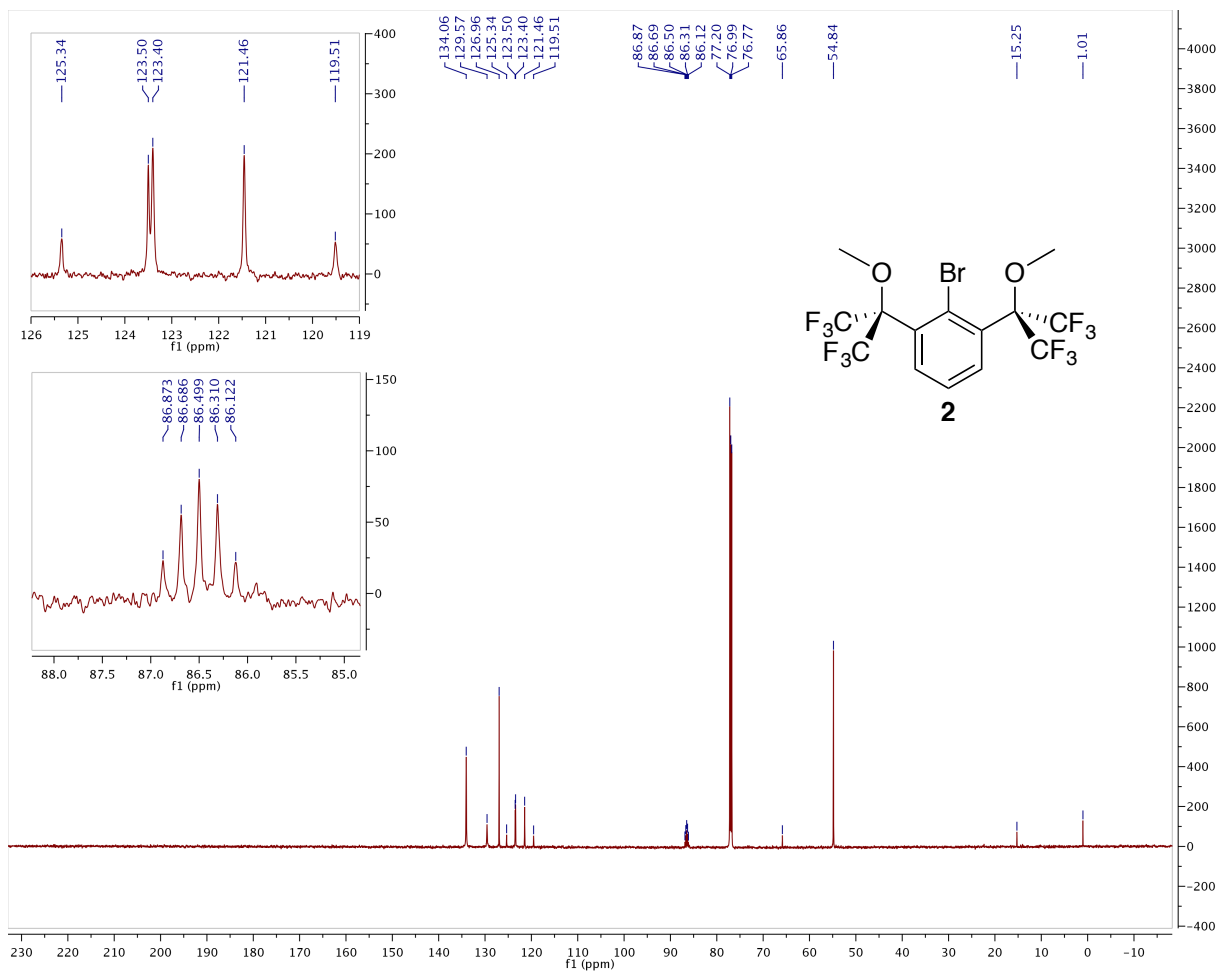

Trace ether and grease are present.



**<sup>19</sup>F NMR (471 MHz, CDCl<sub>3</sub>) spectrum**

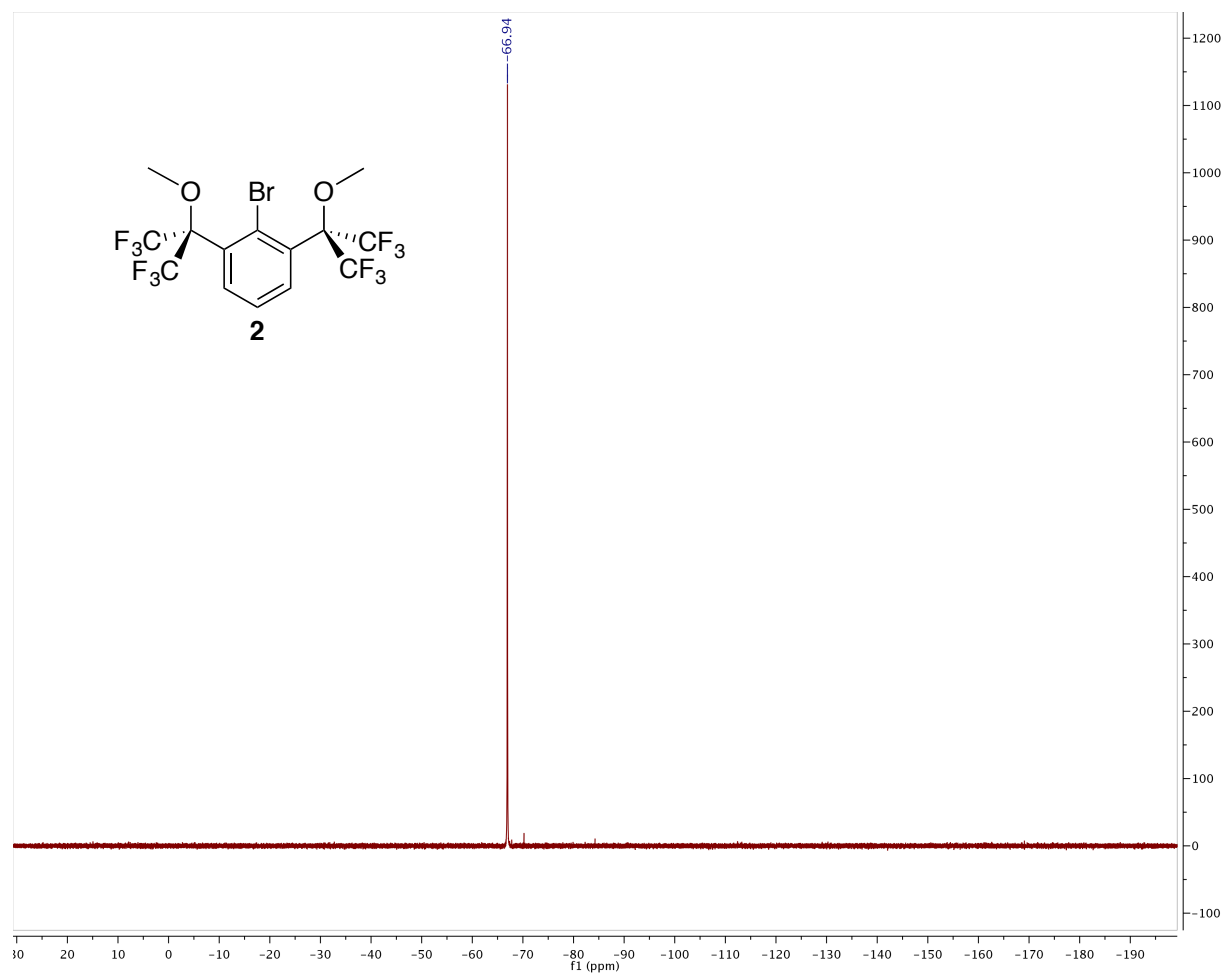

CENTC Elemental Analysis Facility  
University of Rochester  
Rochester, NY 14627 USA  
Email: ealab@chem.rochester.edu

|                        |                       |                |               |
|------------------------|-----------------------|----------------|---------------|
| <b>Date of report</b>  | 7/2/2021 4:00:04PM    |                |               |
| <b>User ID</b>         | Administrator         |                |               |
| <b>Comments</b>        | B89 [ Cain / Chinen ] |                |               |
| <b>DATE &amp; TIME</b> | 7/2/2021 10:01:04 AM  | <b>P_ID</b>    | EA LAB        |
| <b>SAMPLE ID</b>       | 21372                 | <b>USER ID</b> | Administrator |
| <b>WEIGHT (mg)</b>     | 2.431                 | <b>MODE</b>    | CHN           |

|          |         |
|----------|---------|
| CARBON   | 32.708% |
| HYDROGEN | 1.769%  |
| NITROGEN | 0.007%  |

#### Acknowledgment

Analytical data were obtained from the CENTC Elemental Analysis Facility at the University of Rochester, funded by NSF CHE-0650456.

#### Instrumentation

Microanalysis samples were weighed with a PerkinElmer Model AD6000 Autobalance and their compositions were determined with a PerkinElmer 2400 Series II Analyzer.

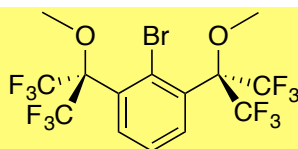

Chemical Formula:  $C_{14}H_9BrF_{12}O_2$   
Exact Mass: 515.9594  
Molecular Weight: 517.1088  
m/z: 515.9594 (100.0%), 517.9574 (97.3%), 516.9628 (15.1%),  
518.9607 (14.7%), 517.9661 (1.1%), 519.9641 (1.0%)  
Elemental Analysis: C, 32.52; H, 1.75; Br, 15.45; F, 44.09; O, 6.19

### Synthesis of 3.

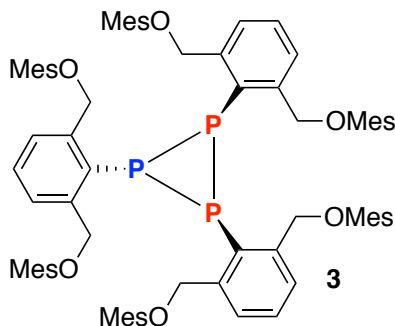

OCO-supported aryl bromide **1** (1.134 g, 2.50 mmol) was loaded into a Schlenk flask, dissolved in Et<sub>2</sub>O (60 mL), taken outside of the glovebox, and cooled to -78 °C. A 1.6 M solution of *n*-BuLi in hexanes (1.7 mL, 2.72 mmol, 1.1 equiv) was injected (under N<sub>2</sub>), and the reaction mixture was stirred at -78 °C for 5 min. A second Schlenk flask containing a solution of PCl<sub>3</sub> (550 mg, 4.01 mmol, 1.6 equiv.) in Et<sub>2</sub>O (5 mL) was transferred via cannula to the cooled reaction mixture. The reaction mixture was stirred at -78 °C for 10 min and then at room temperature (RT) for 1 h, leading to the precipitation of a white solid. The volatiles were removed under reduced pressure, the Schlenk flask was brought back into the glovebox, the residue was triturated with Et<sub>2</sub>O (10 mL), and the volatiles were again removed. The residue was dissolved in THF (20 mL), and PMe<sub>3</sub> was added (485 mg, 6.375 mmol, 2.6 equiv.). The reaction mixture was stirred at RT for 1 d. The organic volatiles were removed under reduced pressure, and the residue was extracted with toluene (3 x 20 mL). The combined extracts were filtered through a Celite plug, the filtrate was concentrated to dryness, triturated with *n*-pentane (10 mL), and again concentrated to dryness under reduced pressure. The resulting residue was triturated with acetonitrile (10 mL) and stirred at RT for 1 h, generating a white precipitate that was collected by filtration and dried (565 mg, 0.466 mmol, 56%). X-Ray quality crystals of **3** were obtained by recrystallization from a solution of hot acetonitrile.

Anal. Calcd for C<sub>78</sub>H<sub>87</sub>O<sub>6</sub>P<sub>3</sub>: C, 77.20; H, 7.23. Found: C, 76.89; H, 7.14. <sup>31</sup>P{<sup>1</sup>H} NMR (202 MHz, CDCl<sub>3</sub>): δ -116.2 (d, <sup>1</sup>J<sub>PP</sub> = 186 Hz), -144.0 (t, <sup>1</sup>J<sub>PP</sub> = 186 Hz). <sup>1</sup>H NMR (500 MHz, CDCl<sub>3</sub>): δ 7.71 (d, *J* = 7.7 Hz, 2H, Ar<sup>1</sup>), 7.40 (t, *J* = 7.7 Hz, 1H, Ar<sup>1</sup>), 7.33-7.28 (m, 4H, Ar<sup>2</sup>), 7.28-7.22 (m, 2H, Ar<sup>2</sup>), 6.71 (s, 8H, Ar<sup>2</sup>), 6.62 (s, 4H, Ar<sup>1</sup>), 5.39 (s, 4H, CH<sub>2</sub>-Ar<sup>1</sup>), 4.71 (br, 8H, CH<sub>2</sub>-Ar<sup>2</sup>), 2.25 (s, 12H, Ar<sup>1</sup>), 2.20 (s, 6H, Ar<sup>1</sup>), 2.02 (s, 12H, Ar<sup>2</sup>), 1.95 (br, 24H, Ar<sup>2</sup>). <sup>13</sup>C NMR (126 MHz, CDCl<sub>3</sub>): δ 153.46 (Ar), 153.44 (Ar), 143.5 (Ar), 143.4 (d, *J*<sub>PC</sub> = 6.9 Hz, Ar), 133.6 (Ar), 133.0 (Ar), 132.9 (Ar), 130.7 (Ar), 130.5 (Ar), 130.4 (Ar), 129.6 (Ar), 129.4 (Ar), 129.0 (Ar), 128.4 (d, *J*<sub>PC</sub> = 10.0 Hz, Ar), 127.9 (Ar), 126.4 (Ar), 73.2 (CH<sub>2</sub>), 72.8 (d, *J*<sub>PC</sub> = 7.6 Hz, CH<sub>2</sub>), 20.9 (CH<sub>3</sub>), 16.7 (CH<sub>3</sub>), 16.4 (CH<sub>3</sub>), 16.3 (CH<sub>3</sub>).

Ar<sup>1</sup> refers to the aryl groups associated with the Blue P

Ar<sup>2</sup> refers to the aryl groups associated with the Red Ps.

7.72  
7.70  
7.41  
7.40  
7.38  
7.31  
7.30  
7.26  
7.26  
7.25  
7.23  
6.82  
6.71  
6.62

5.39

4.71

2.25  
2.20  
2.02  
1.95

<sup>1</sup>H NMR Spectrum of **3**

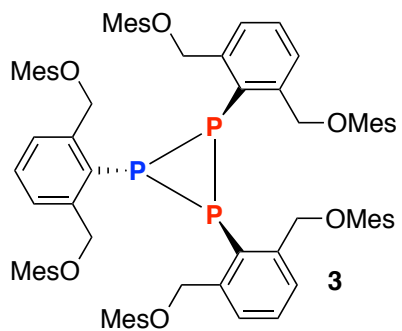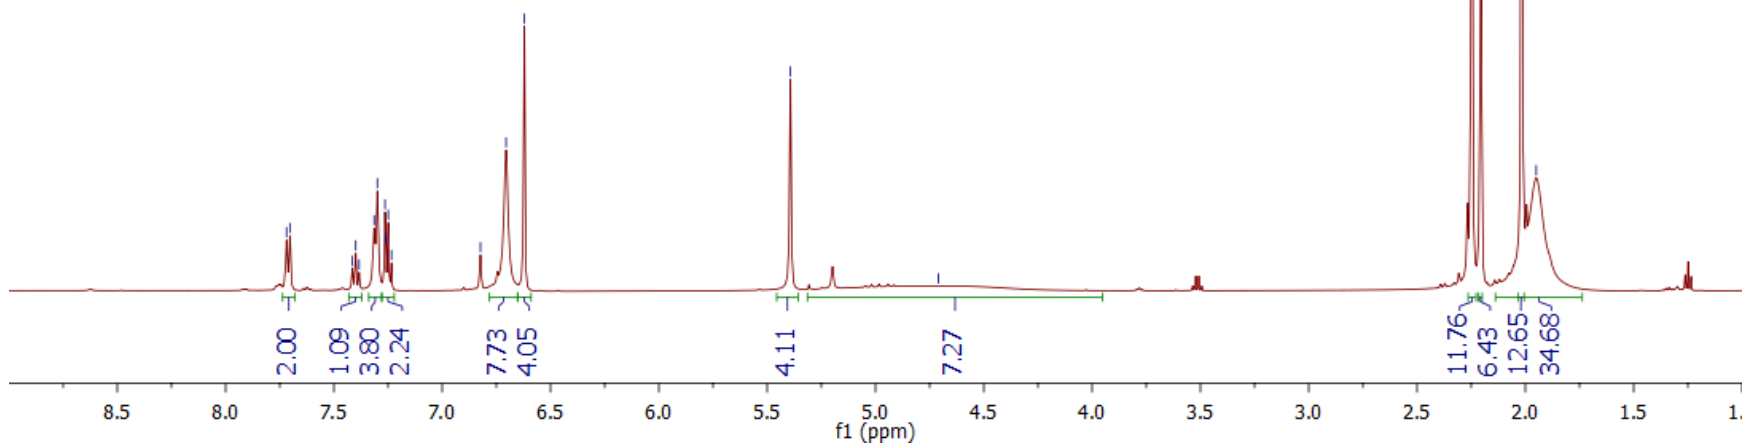

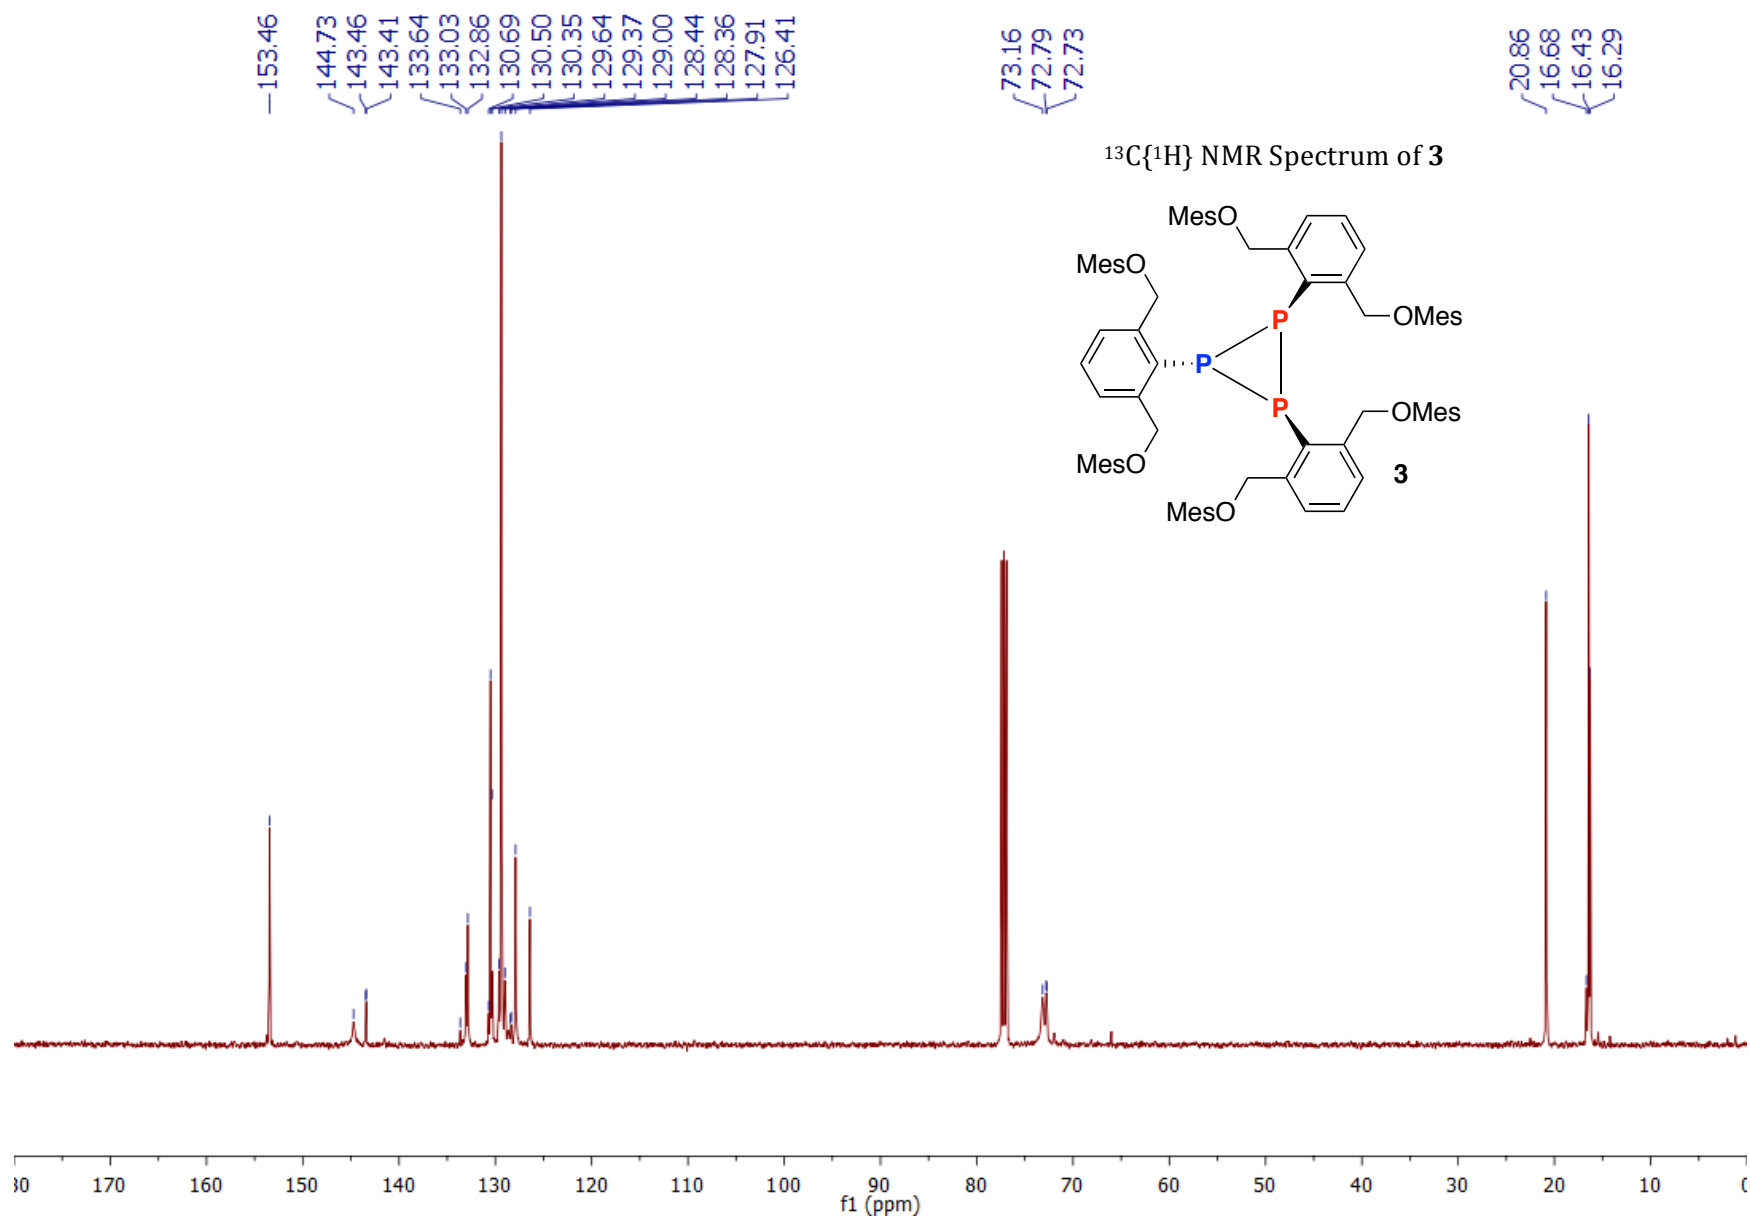

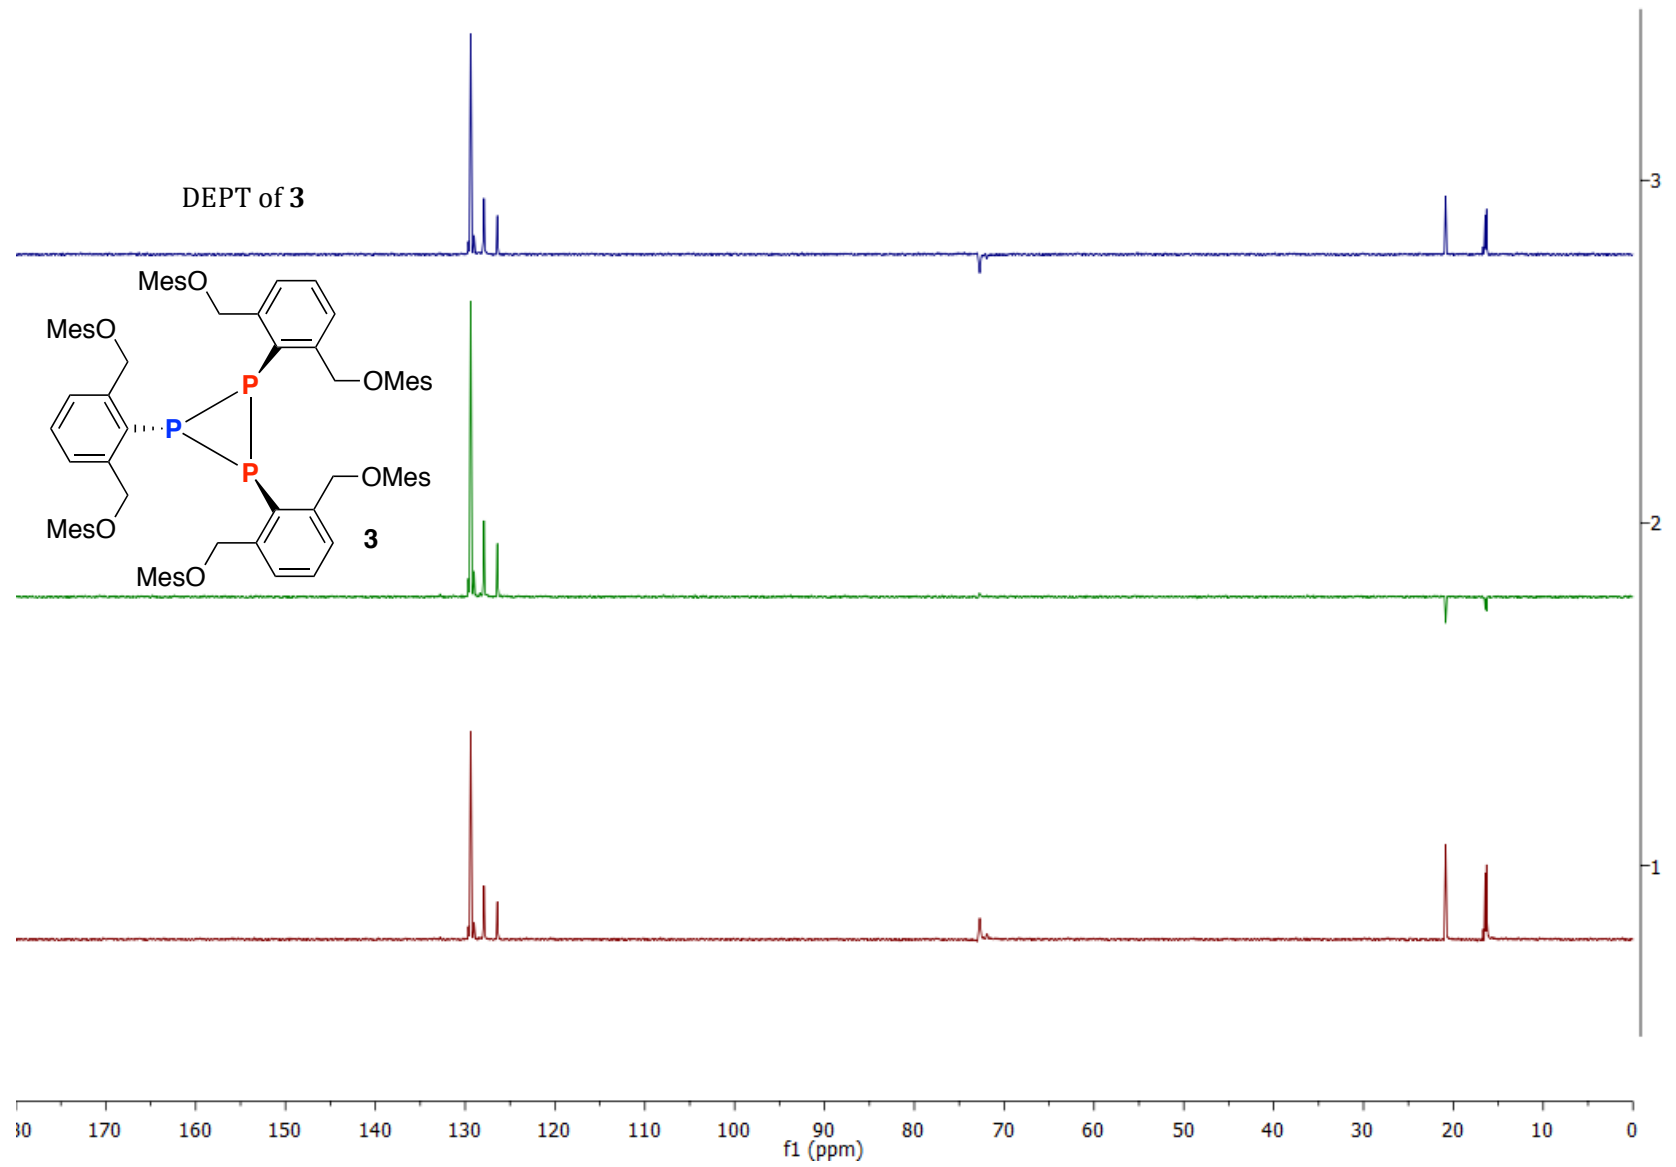

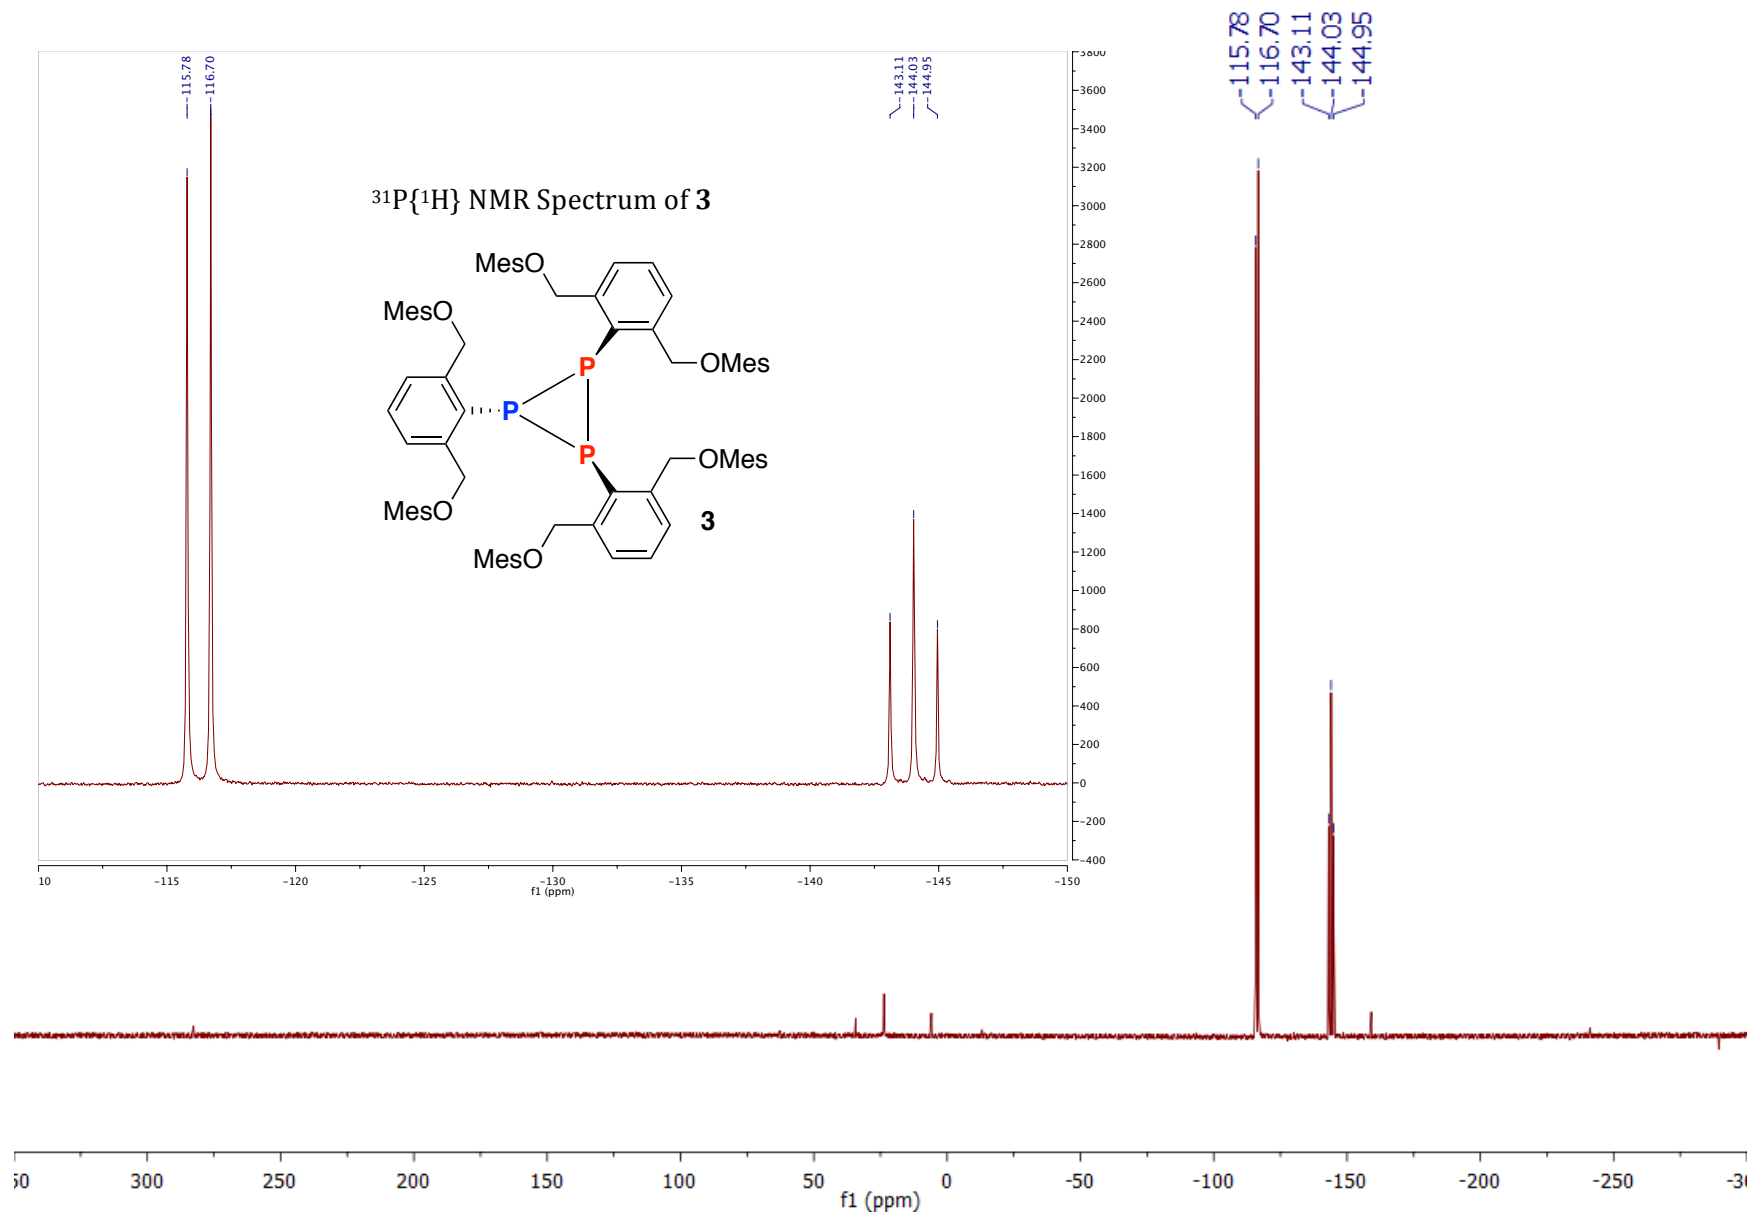

CENTC Elemental Analysis Facility  
University of Rochester  
Rochester, NY 14627 USA  
Email: ealab@chem.rochester.edu

**Date of report** 6/2/2017 9:04:46PM

**User ID** Administrator

**Comments** JH167 [ Cain / Hyl ]

DATE & TIME 6/2/2017 9:04:04 PM  
SAMPLE ID 17322D  
WEIGHT (mg) 2.720

CARBON 76.728%  
HYDROGEN 7.258%  
NITROGEN 0.131%

DATE & TIME 6/2/2017 8:52:18 PM  
SAMPLE ID 17322  
WEIGHT (mg) 2.145

CARBON 76.893%  
HYDROGEN 7.138%  
NITROGEN -.095%

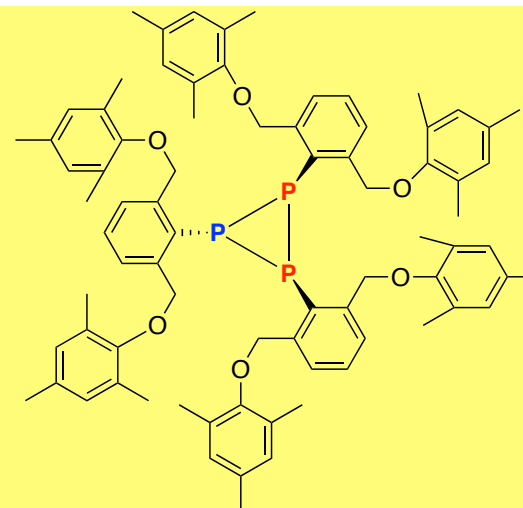

Chemical Formula:  $C_{78}H_{87}O_6P_3$   
Exact Mass: 1212.5716  
Molecular Weight: 1213.4693  
Elemental Analysis: C, 77.20; H, 7.23; O, 7.91; P, 7.56

#### Special Handling

The sample was transferred under argon and was combusted in a tin capsule that was crimp-sealed with a die apparatus.

#### Acknowledgment

Analytical data were obtained from the CENTC Elemental Analysis Facility at the University of Rochester funded by NSF CHE-0650456.

#### Instrumentation

Microanalysis samples were weighed with a PerkinElmer Model AD-6 Autobalance and their compositions were determined with a PerkinElmer 2400 Series II Analyzer. Air-sensitive samples were handled in a VAC Atmospheres glovebox.



## Generation and Observation of **5** by $^{31}\text{P}\{^1\text{H}\}$ and $^{19}\text{F}$ NMR Spectroscopy.

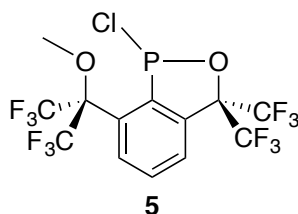

Fluorinated aryl bromide **2** (500 mg, 0.967 mmol) was dissolved in 6 mL of THF in a vial with a stir bar inside the glovebox and  $(i\text{-Pr})\text{MgCl}\cdot\text{LiCl}$  was added dropwise via syringe (0.82 mL, 1.064 mmol, 1.1 equiv, 1.3 M in THF), resulting in a homogeneous, yellow reaction mixture. The reaction mixture was stirred for 1 h at RT then directly filtered into 2 mL of a pre-cooled solution ( $-35\text{ }^\circ\text{C}$ , 1 h) of  $\text{PCl}_3$  (146 mg, 1.064 mmol, 1.1 equiv) in THF. The solution was warmed to RT for 1 h then analyzed by  $^{31}\text{P}\{^1\text{H}\}$  NMR spectroscopy, revealing the presence of unreacted  $\text{PCl}_3$  (218 ppm),  $i\text{-PrPCl}_2$  (202 ppm) and the chlorophosphine (171 ppm). The “intermediate” product mixture was then concentrated under vacuum to remove the volatile and unwanted phosphorus byproducts ( $\text{PCl}_3$  and  $i\text{-PrPCl}_2$ ), leaving a pale yellow solid (405 mg, 0.751 mmol, 78%) that was reanalyzed by  $^{31}\text{P}\{^1\text{H}\}$  and  $^{19}\text{F}$  NMR spectroscopy in  $\text{C}_6\text{D}_6$ .

$^{19}\text{F}$  NMR (282 MHz,  $\text{C}_6\text{D}_6$ ): \*  $\delta$  -68.9 (m,  $J_{\text{FF}} \sim 8\text{ Hz}$ ,  $J_{\text{PF}} \sim 2\text{ Hz}$ ,  $J_{\text{HF}} \sim 0.5\text{-}1.5\text{ Hz}$ ), -70.4 (m,  $J_{\text{FF}} \sim 8\text{ Hz}$ ,  $J_{\text{PF}} \sim 4\text{ Hz}$ ,  $J_{\text{HF}} \sim 0.2\text{-}2.6\text{ Hz}$ ), 70.9 (s, impurity\*\*), -73.4 (m,  $J_{\text{FF}} \sim 9\text{ Hz}$ ,  $J_{\text{PF}} \sim 2\text{ Hz}$ ,  $J_{\text{HH}} \sim 1\text{ Hz}$ ), -76.3 (m,  $J_{\text{FF}} \sim 9\text{ Hz}$ ,  $J_{\text{PF}} \sim 2\text{ Hz}$ ,  $J_{\text{HH}} \sim 0.5\text{-}2\text{ Hz}$ ).  $^{31}\text{P}\{^1\text{H}\}$  NMR (121 MHz,  $\text{C}_6\text{D}_6$ ):  $\delta$  166.4 (s).

\*Reported coupling constants in the  $^{19}\text{F}$  NMR spectrum were determined by simulation with Mestrenova.

\*\*The impurity at 70.9 ppm in the  $^{19}\text{F}$  NMR spectrum is the product of protodemetalation.

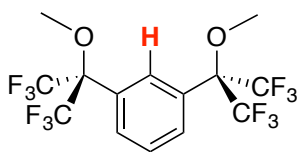

# $^{19}\text{F}$ NMR (282 MHz, $\text{C}_6\text{D}_6$ ) spectra

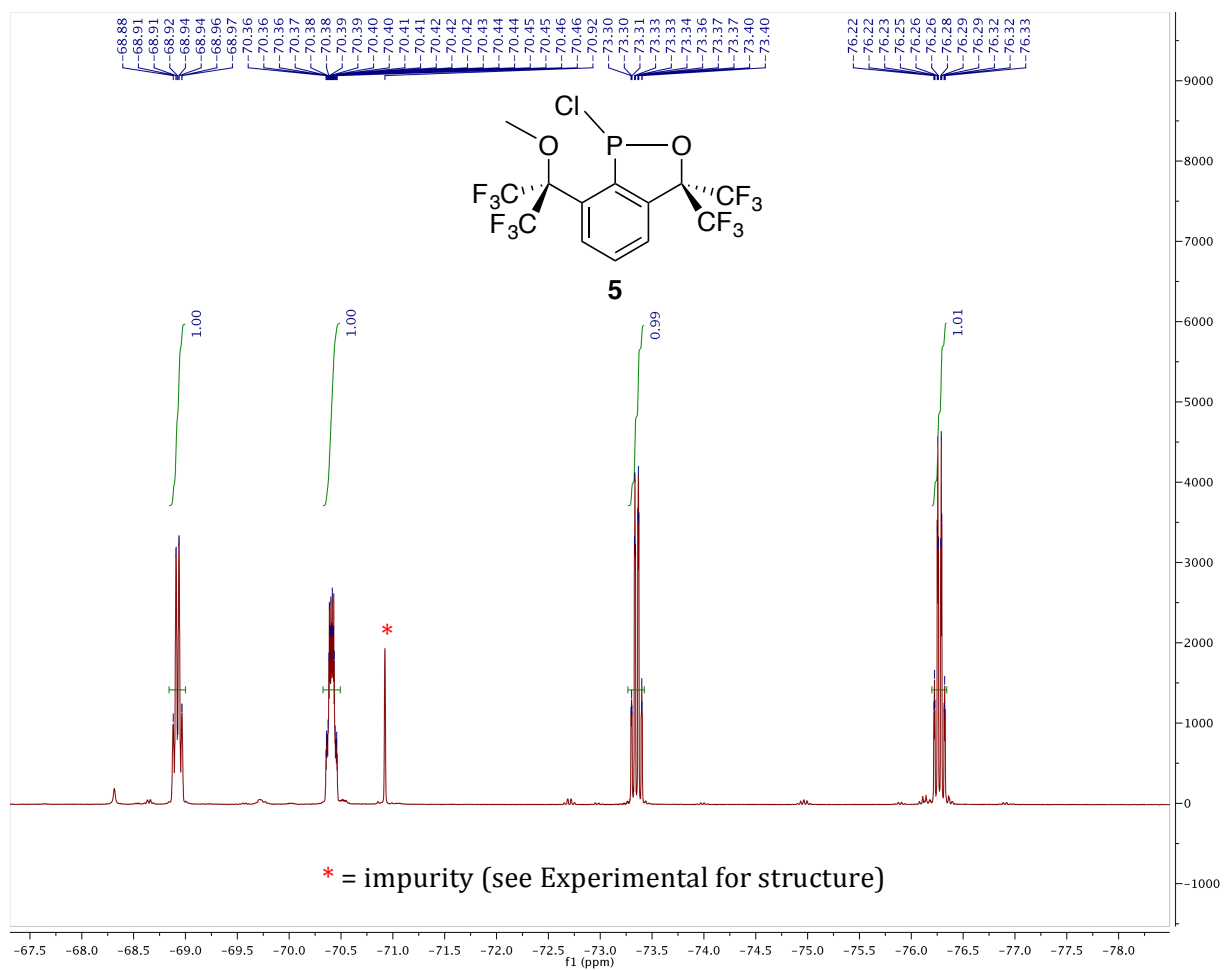

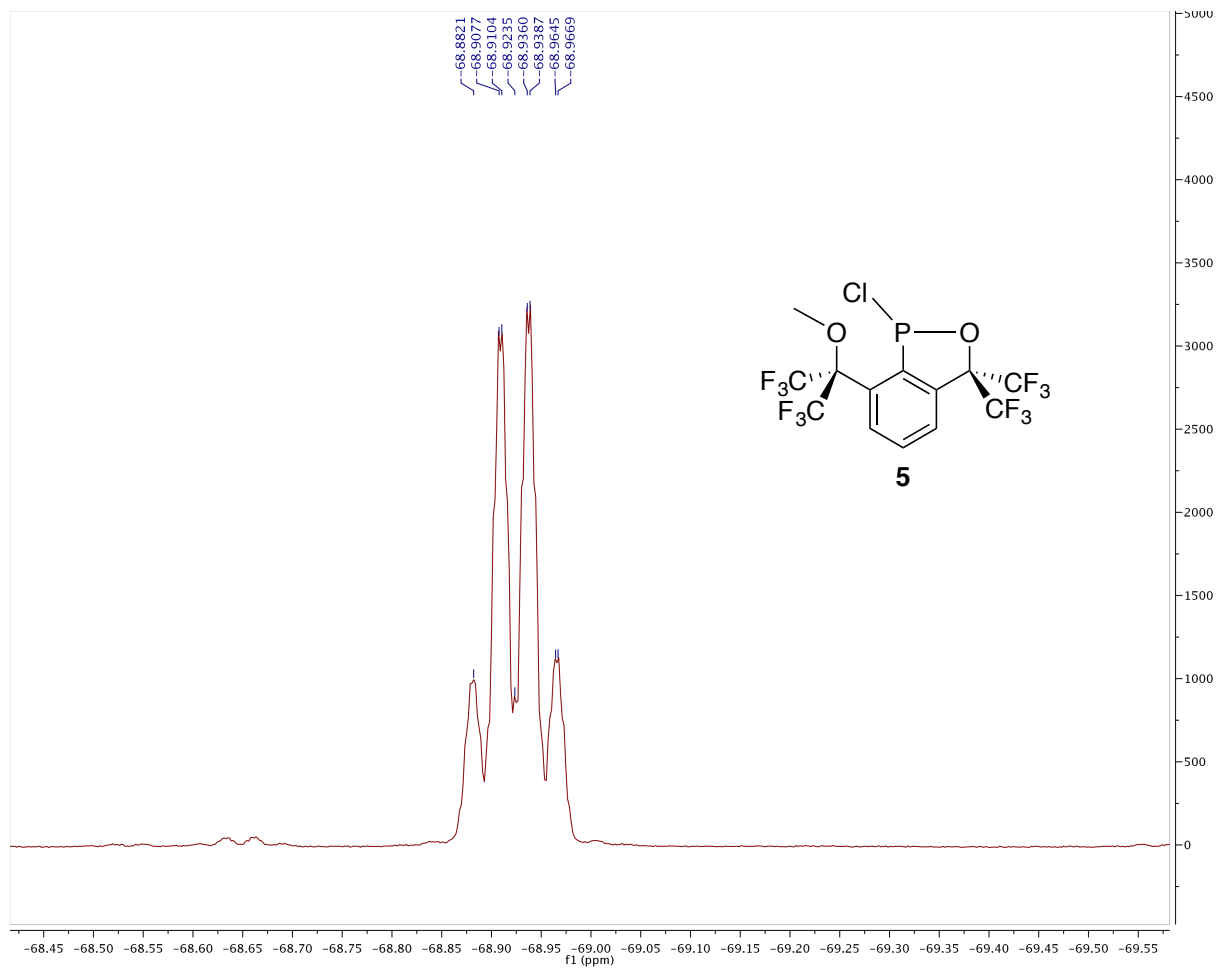

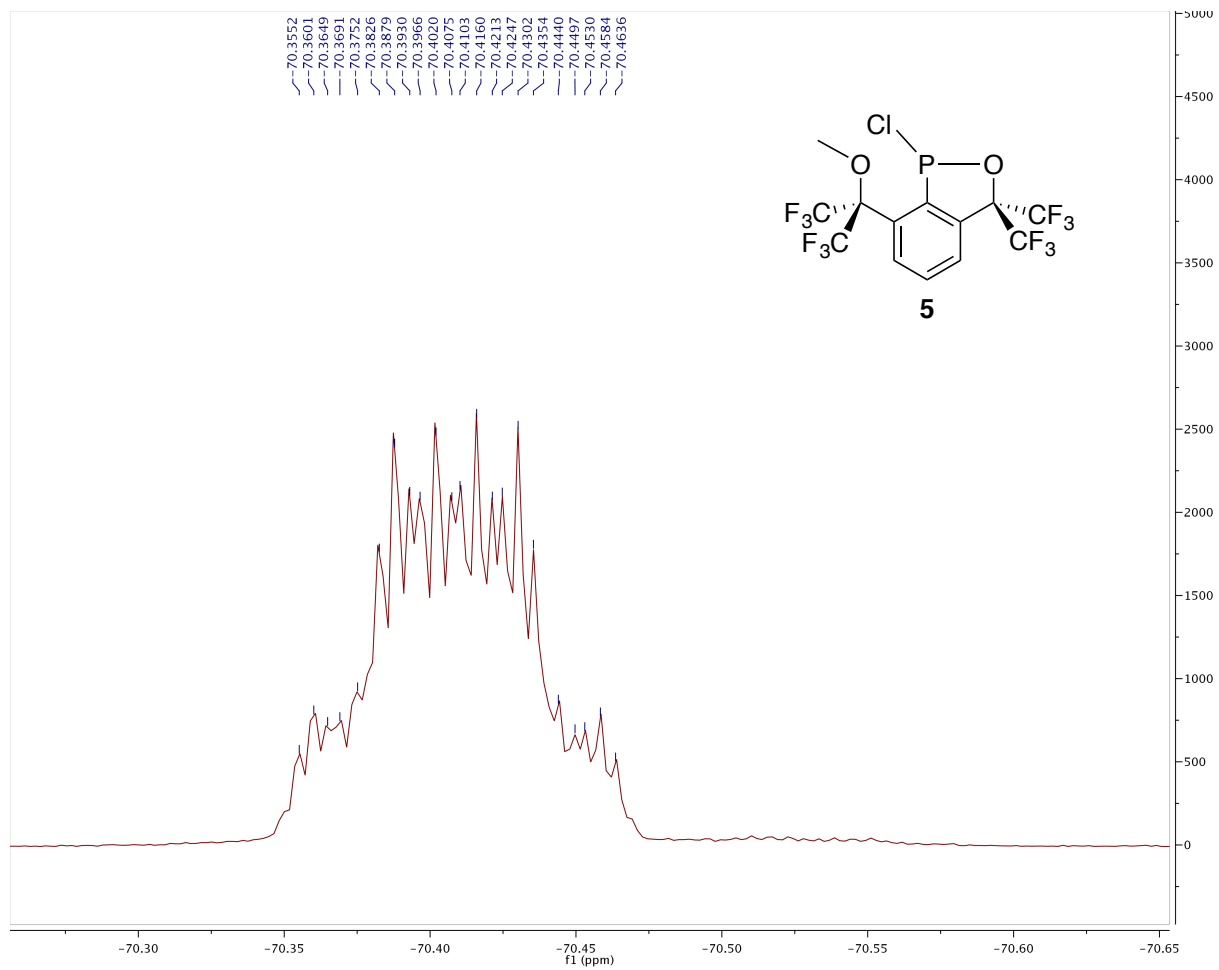

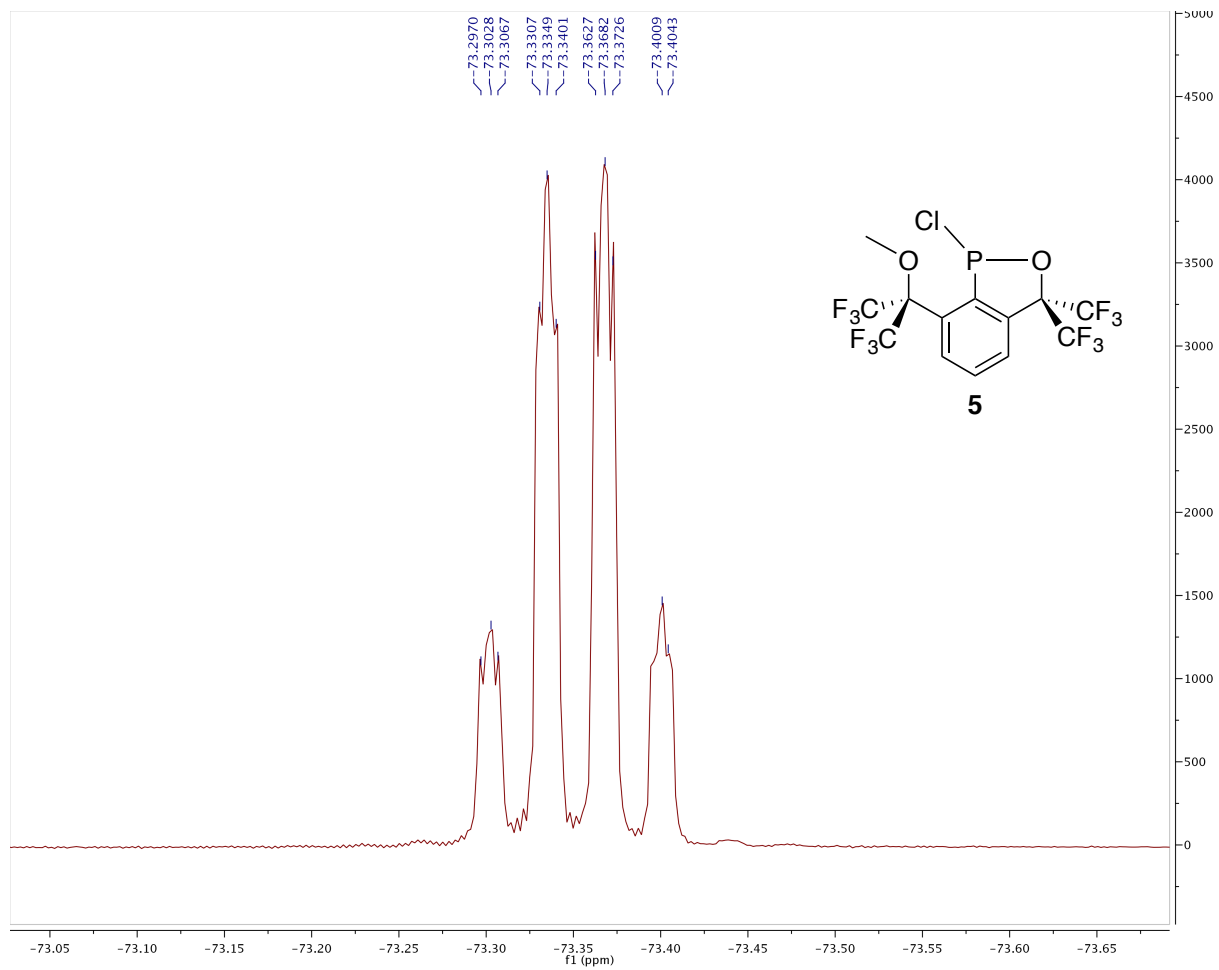

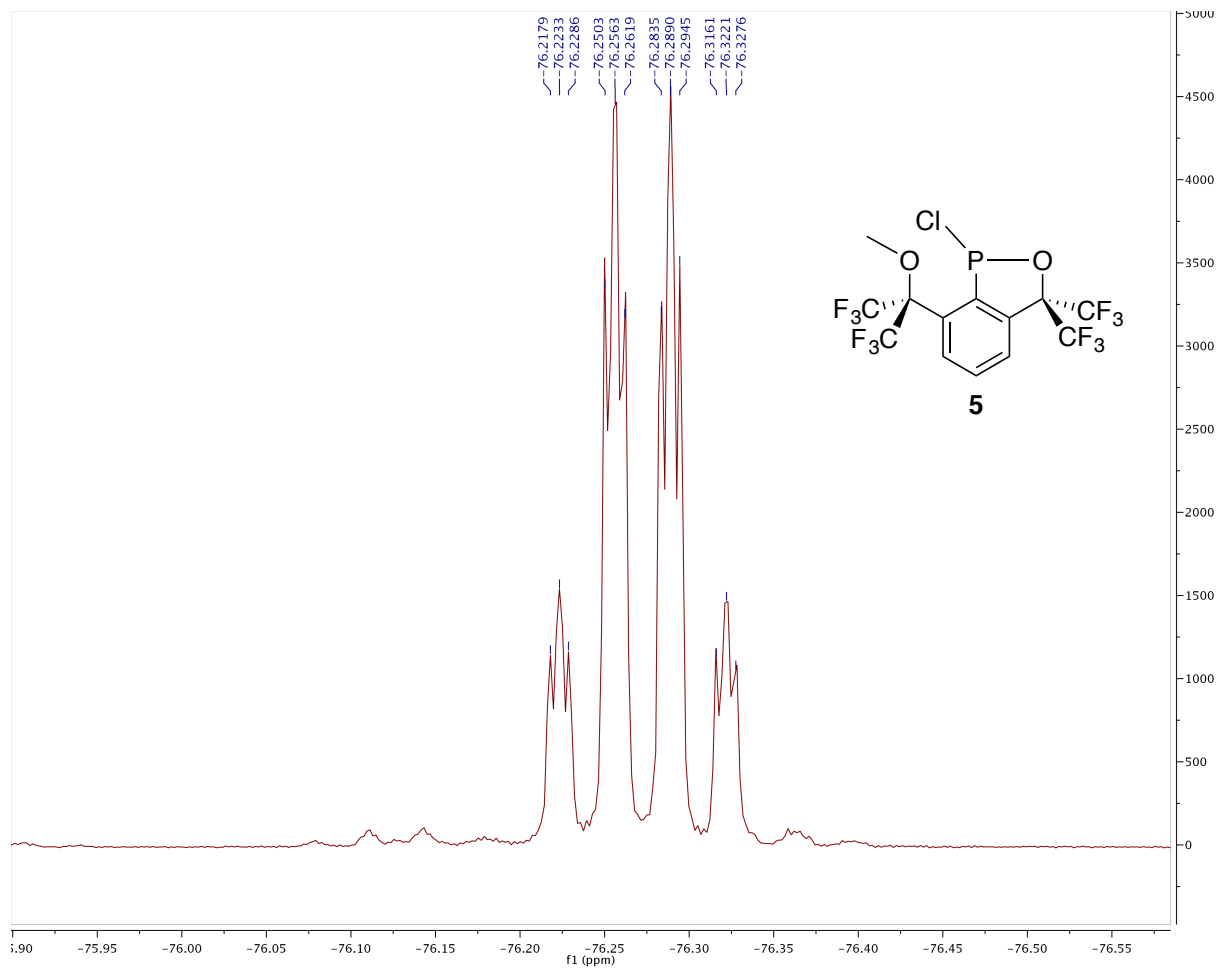

**$^{31}\text{P}\{^1\text{H}\}$  NMR (121 MHz,  $\text{C}_6\text{D}_6$ ) spectrum**

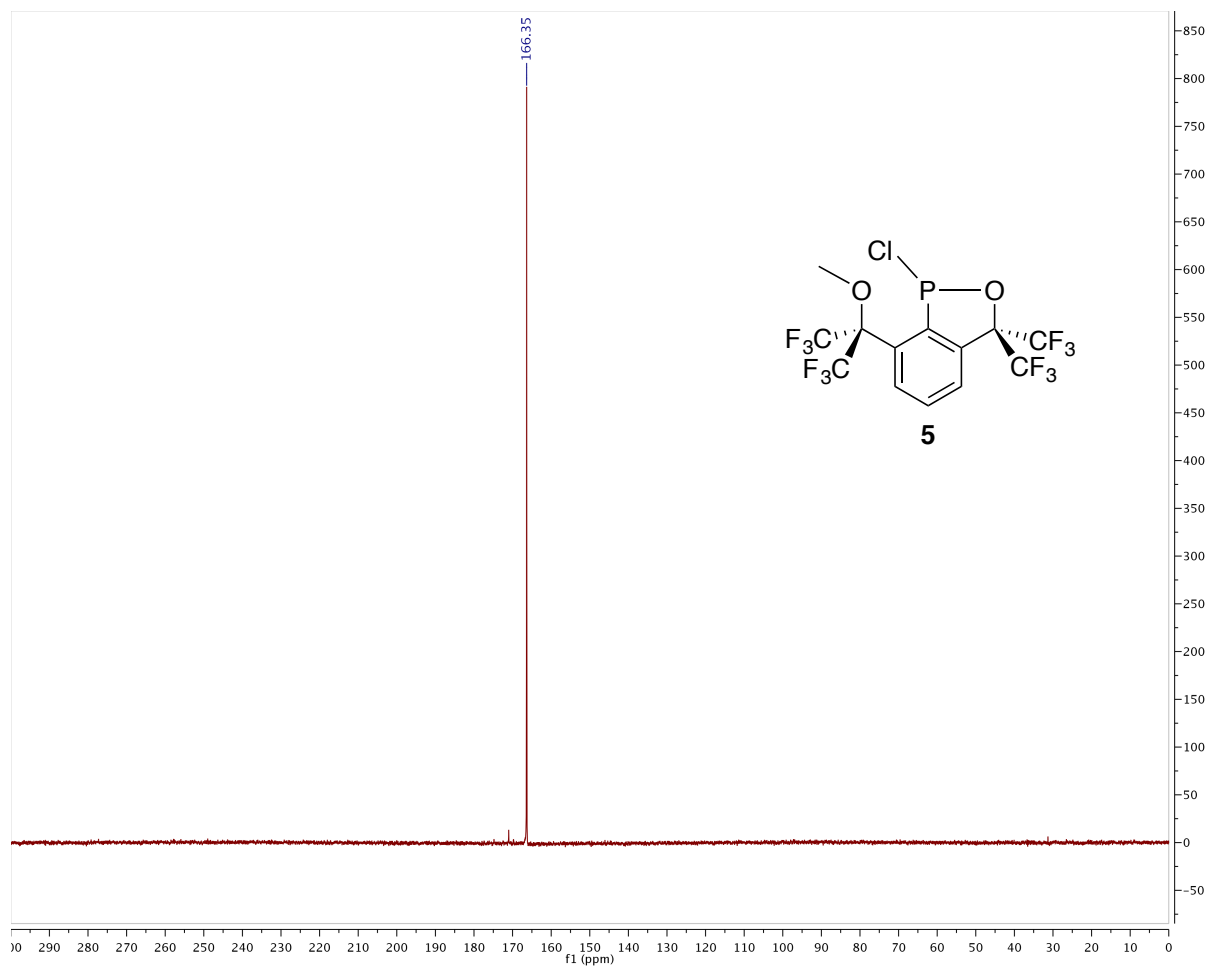

## Synthesis of 6.

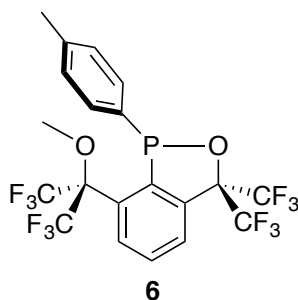

Fluorinated aryl bromide **2** (500 mg, 0.967 mmol) was dissolved in 6 mL of THF in a vial with a stir bar inside the glovebox and (*i*-Pr)MgCl·LiCl was added dropwise via syringe (0.82 mL, 1.064 mmol, 1.1 equiv, 1.3 M in THF), resulting in a homogeneous, yellow reaction mixture. The reaction mixture was stirred for 1 h at room temperature (RT) then directly filtered into 2 mL of a pre-cooled solution (-35 °C, 1 h) of PCl<sub>3</sub> (146 mg, 1.064 mmol, 1.1 equiv) in THF. The solution was warmed to RT for 1 h then analyzed by <sup>31</sup>P{<sup>1</sup>H} NMR spectroscopy, revealing the presence of unreacted PCl<sub>3</sub> (218 ppm), *i*-PrPCl<sub>2</sub> (202 ppm) and the chlorophosphine (170 ppm). The “intermediate” product mixture was then concentrated under vacuum to remove the volatile and unwanted phosphorus byproducts (PCl<sub>3</sub> and *i*-PrPCl<sub>2</sub>), leaving a pale yellow residue that was dissolved in 6 mL of THF and transferred to a Schlenk bomb fitted with a screw-top Teflon cap. The bomb was taken outside of the glovebox, cooled to 0 °C, and (*p*-CH<sub>3</sub>)C<sub>6</sub>H<sub>4</sub>MgBr (1.06 mL, 1.064 mmol, 1.1 equiv, 1.0 M in THF) was injected via syringe under positive N<sub>2</sub> pressure, affording a light orange reaction mixture, which was subsequently warmed to RT. The Schlenk bomb was resealed (under positive N<sub>2</sub> pressure), brought back inside the glove box, and an aliquot was analyzed by <sup>31</sup>P{<sup>1</sup>H} NMR spectroscopy displaying a prominent signal at 129 ppm with slight impurities at -2 and -8 ppm. The entire reaction mixture was concentrated under vacuum, extracted with pentane (3 x 50 mL), and filtered through a Kimwipe plug. The filtrate was concentrated under vacuum, dissolved in ether (2 mL) and cooled to -35 °C overnight, resulting in large white/colorless blocks suitable for X-ray diffraction (202 mg, 0.371 mmol, 38% yield).

Anal. Calcd for C<sub>20</sub>H<sub>13</sub>F<sub>12</sub>O<sub>2</sub>P: C, 44.14; H, 2.41. Found: C, 44.09; H, 2.41. <sup>1</sup>H NMR (600 MHz, C<sub>6</sub>D<sub>6</sub>): δ 7.57 (br d, *J* = 8 Hz, 1H, Ar), 7.52 (d, *J* = 8 Hz, 1H, Ar), 7.10 (apparent t, *J* = 8 Hz, 2H, Ar), 6.88 (t, *J* = 8 Hz, 1H, Ar), 6.81 (d, *J* = 8 Hz, 2H, Ar), 3.11 (s, 3H, OMe), 1.92 (s, 3H, *p*-Me). <sup>13</sup>C{<sup>1</sup>H} NMR (151 MHz, C<sub>6</sub>D<sub>6</sub>): δ 143.4 (d, *J* = 33 Hz, Ar), 141.2 (Ar), 137.8 (d, *J* = 41 Hz, Ar), 135.7 (d, *J* = 6 Hz, Ar), 133.0 (d, *J* = 5 Hz, Ar), 132.2 (d, *J* = 25 Hz, Ar), 131.1 (Ar), 130.0 (Ar), 129.0 (d, *J* = 8 Hz, Ar), 126.9 (Ar), four overlapping CF<sub>3</sub> signals\*: 123.1 (qd, *J* ~ 290 and 9 Hz), 123.0 (q, *J* ~ 290 Hz), 122.5 (q, *J* ~ 290 Hz), and 122.4 (qd, *J* ~ 290 and 3 Hz), 89.5 (septet of doublets, *J* = 31.5 and 16.5 Hz, C(CF<sub>3</sub>)<sub>2</sub> in P-ring), 80.8 (septet, *J* = 28 Hz, C(CF<sub>3</sub>)<sub>2</sub>), 55.3 (OMe), 21.2 (Me). <sup>19</sup>F NMR (282 MHz, C<sub>6</sub>D<sub>6</sub>):\*\* δ -69.5 (m, *J*<sub>FF</sub> ~ 8 Hz, *J*<sub>PF</sub> ~ 2 Hz, *J*<sub>HF</sub> ~ 0.5-2 Hz), -69.6 (m, *J*<sub>FF</sub> ~ 8 Hz, *J*<sub>PF</sub> ~ 7 Hz, *J*<sub>HF</sub> ~ 0.5-2.5 Hz), -74.0 (m, *J*<sub>FF</sub> ~ 9 Hz, *J*<sub>HF</sub> ~ 0.5-1 Hz), and -76.5 (m, *J*<sub>FF</sub> ~ 9 Hz, *J*<sub>HF</sub> ~ 1-5 Hz). <sup>31</sup>P{<sup>1</sup>H} NMR (121 MHz, C<sub>6</sub>D<sub>6</sub>): δ 129.4 (septet, *J* = 6 Hz). \*In CDCl<sub>3</sub>, the overlapping CF<sub>3</sub> signals in the <sup>13</sup>C{<sup>1</sup>H} NMR spectrum are better resolved: δ 122.5 (q, *J* = 290 Hz), 122.3 (qd, *J* = 290 and 9 Hz), 122.0 (q, *J* = 290 Hz), 121.6 (qd, *J* = 290 and 2 Hz). \*\*Reported coupling constants in the <sup>19</sup>F NMR spectrum were determined by simulation with Mestrenova.



# $^1\text{H}$ NMR (600 MHz, $\text{C}_6\text{D}_6$ ) spectrum

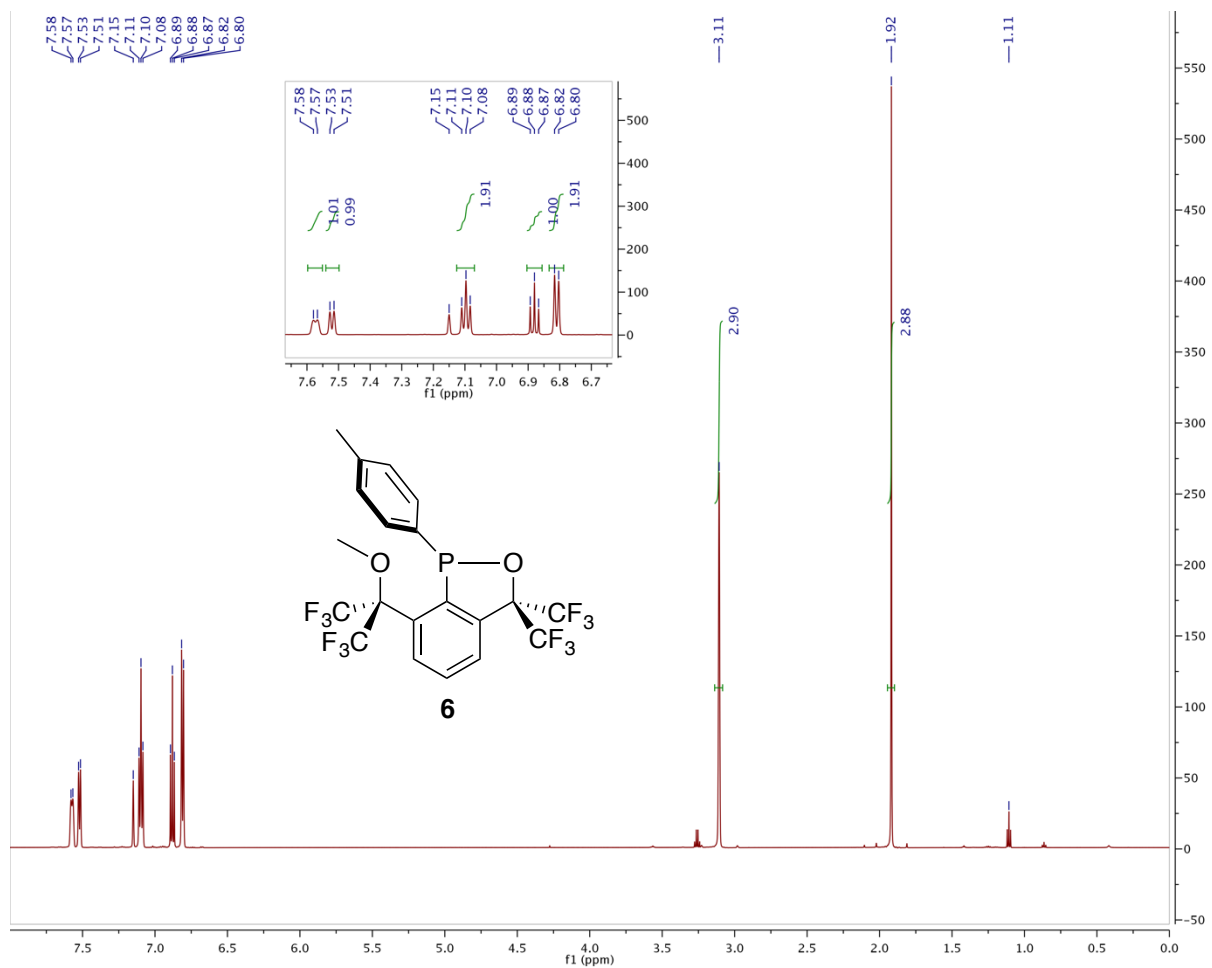

# $^{13}\text{C}\{^1\text{H}\}$ NMR (151 MHz, $\text{C}_6\text{D}_6$ ) spectra

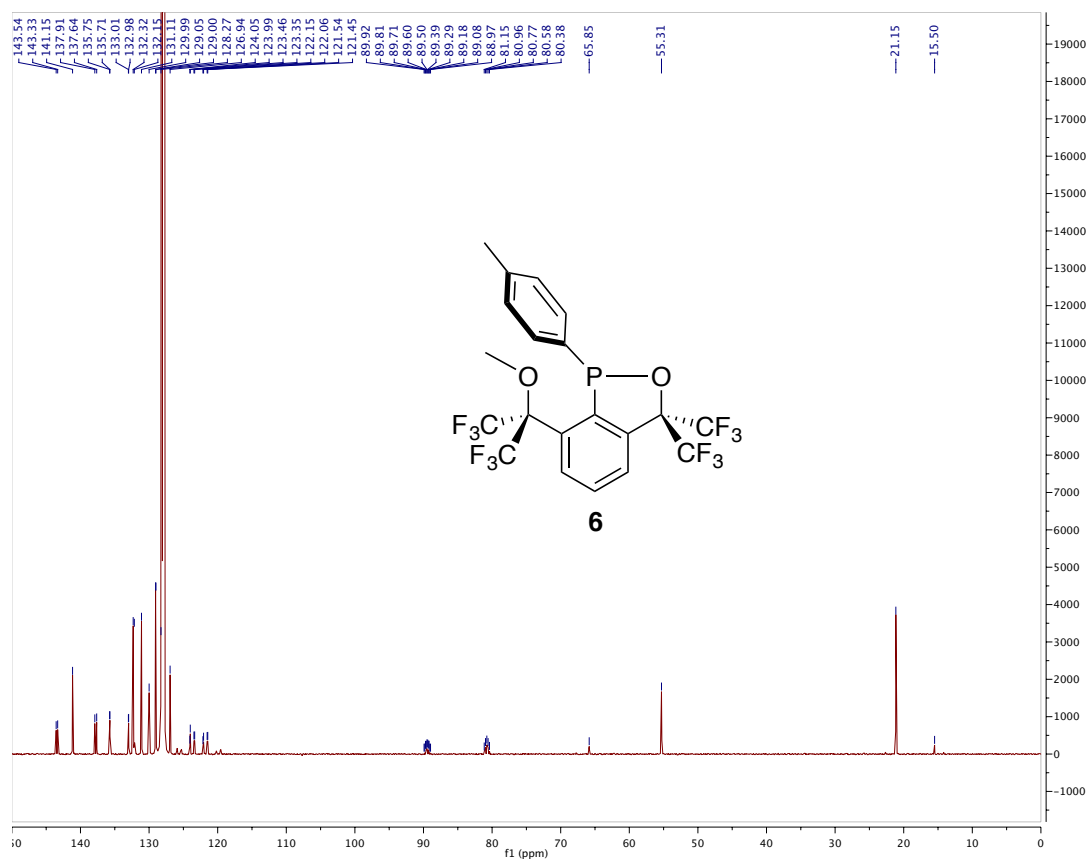

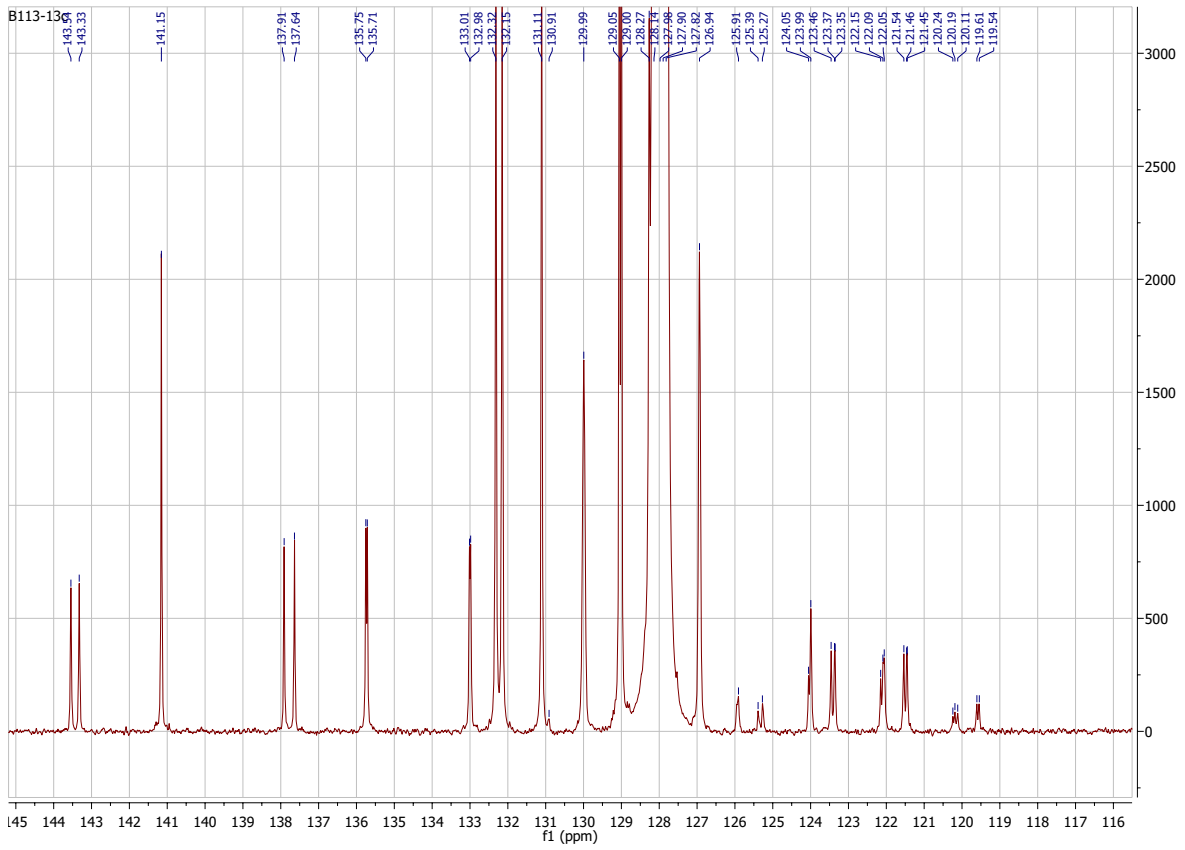

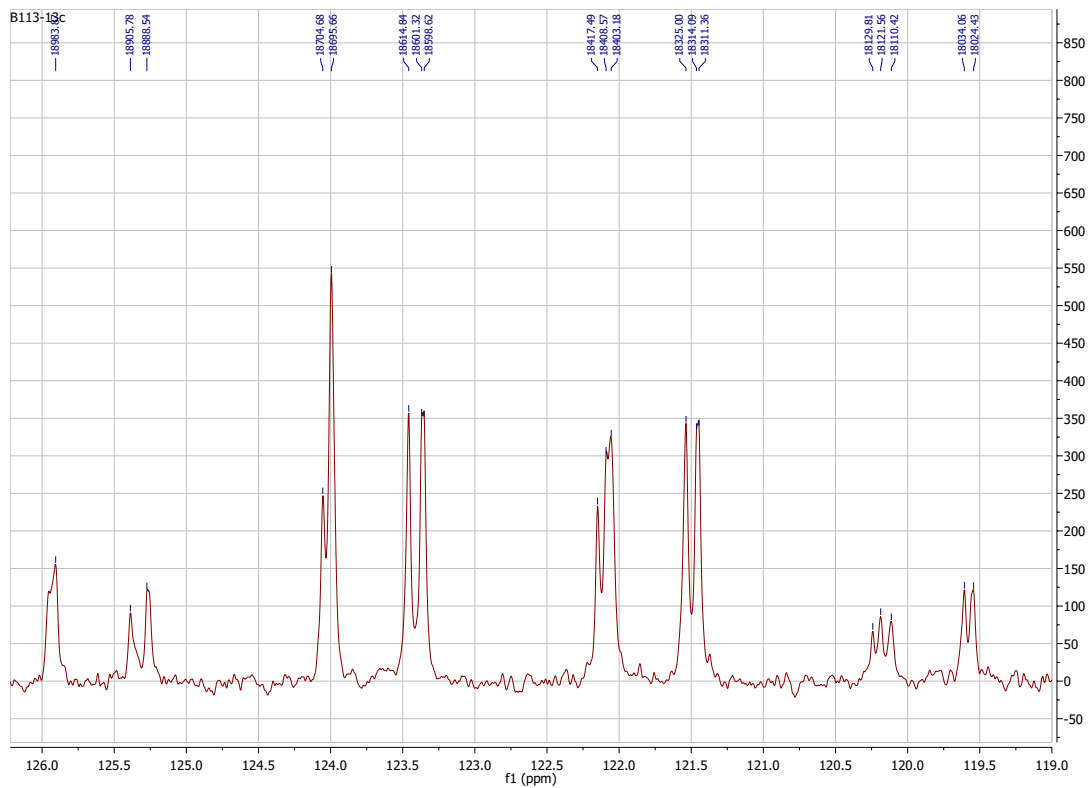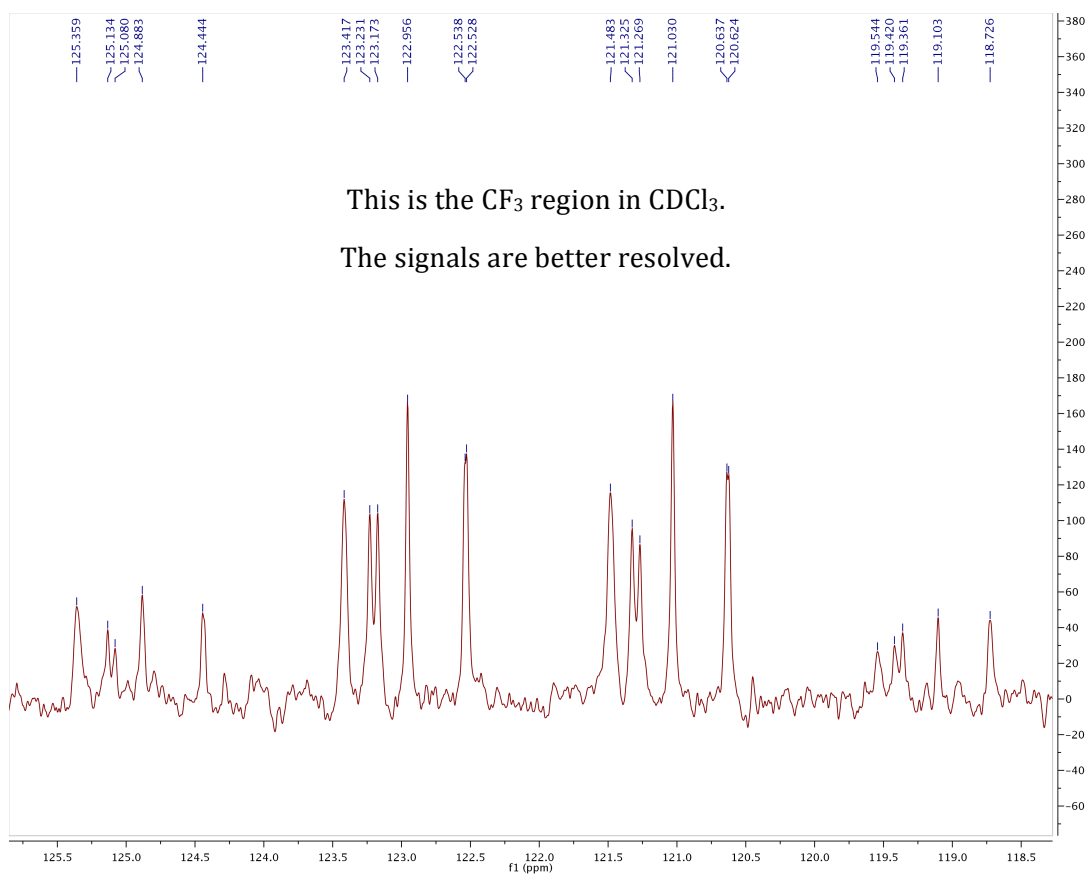

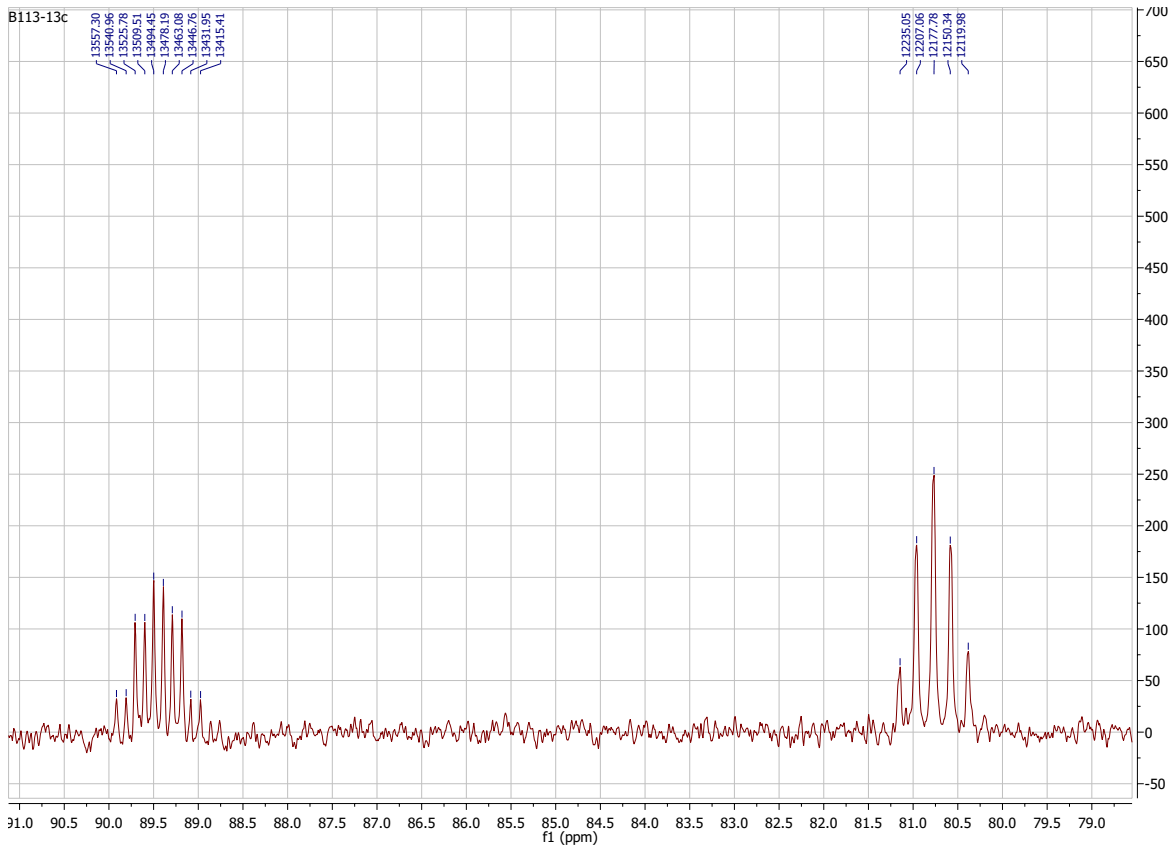

# DEPT-135

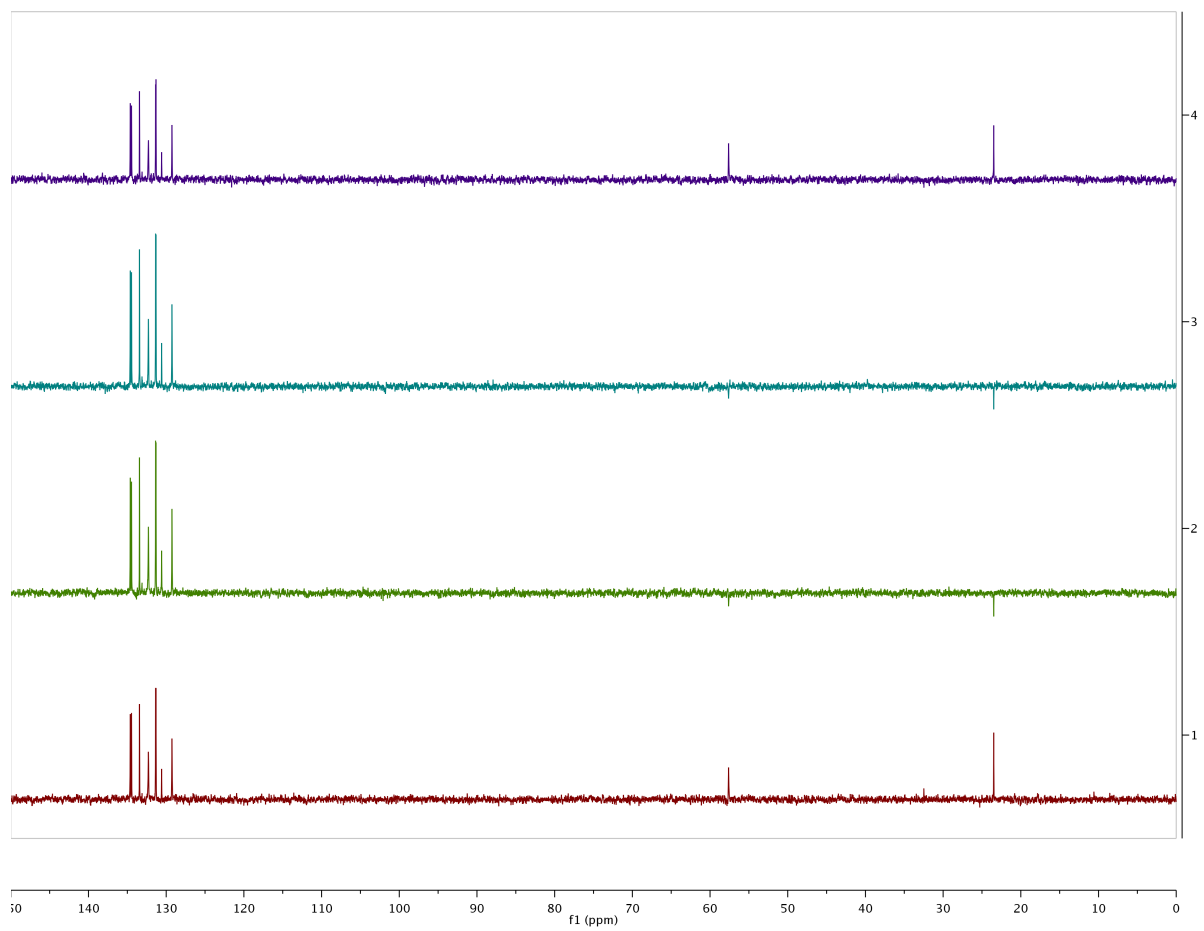

# $^{19}\text{F}$ NMR (282 MHz, $\text{C}_6\text{D}_6$ ) spectrum

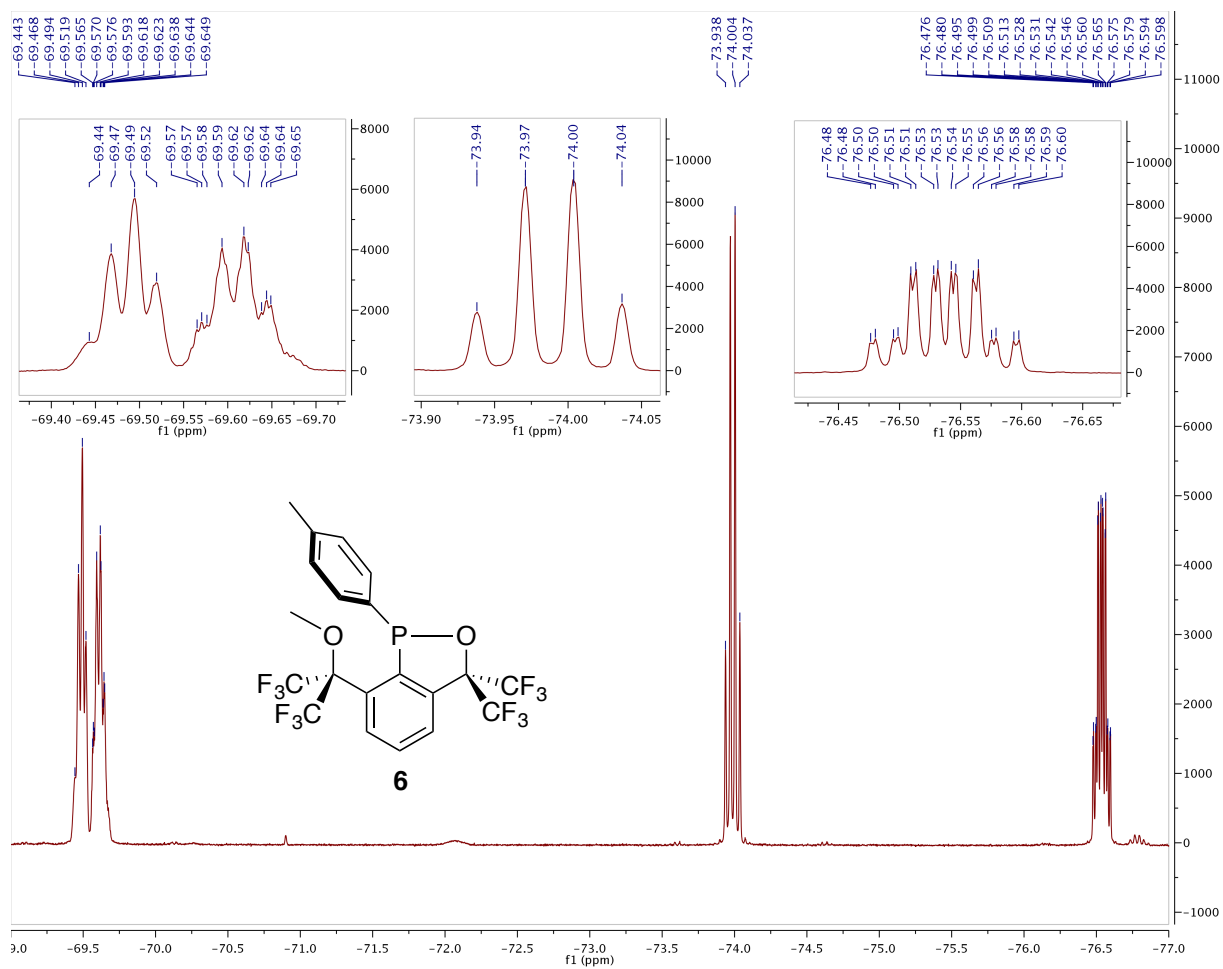

### $^{31}\text{P}\{^1\text{H}\}$ NMR (121 MHz, $\text{C}_6\text{D}_6$ ) spectrum

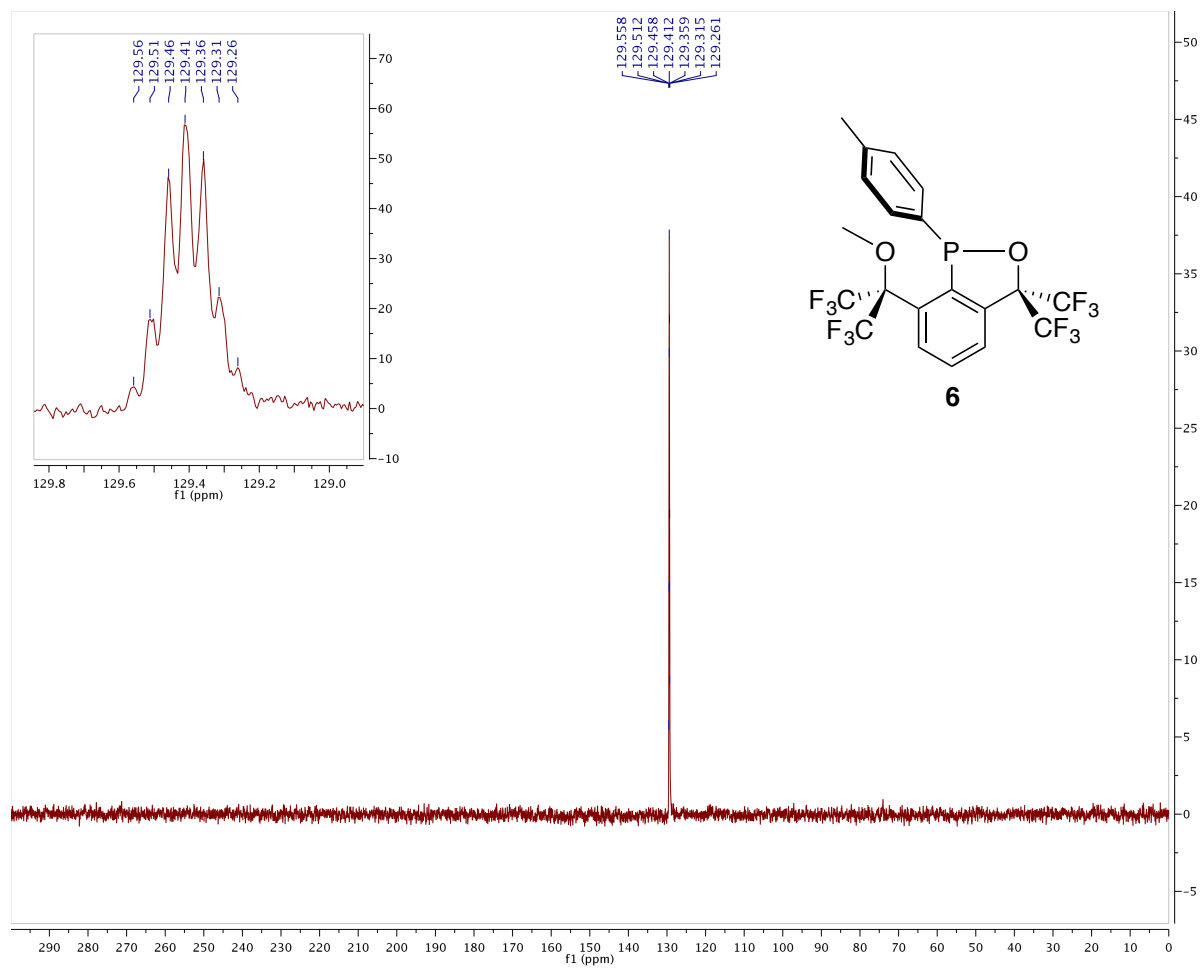



CENTC Elemental Analysis Facility  
University of Rochester  
Rochester, NY 14627 USA  
Email: ealab@chem.rochester.edu

|                       |                           |
|-----------------------|---------------------------|
| <b>Date of report</b> | 6/11/2021 4:30:53PM       |
| <b>User ID</b>        | Administrator             |
| <b>Comments</b>       | RC B111 [ Cain / Chinen ] |

|             |                      |         |               |
|-------------|----------------------|---------|---------------|
| DATE & TIME | 6/11/2021 2:21:07 PM | P_ID    | EA LAB        |
| SAMPLE ID   | 21331                | USER ID | Administrator |
| WEIGHT (mg) | 2.006                | MODE    | CHN           |

|          |         |
|----------|---------|
| CARBON   | 44.088% |
| HYDROGEN | 2.405%  |
| NITROGEN | -.095%  |

#### Special Handling

The sample was transferred under argon and was combusted in a tin capsule that was crimp-sealed with a die apparatus.

#### Acknowledgment

Analytical data were obtained from the CENTC Elemental Analysis Facility at the University of Rochester, funded by NSF CHE-0650456.

#### Instrumentation

Microanalysis samples were weighed with a PerkinElmer Model AD6000 Autobalance and their compositions were determined with a PerkinElmer 2400 Series II Analyzer. Air-sensitive samples were handled in a VAC Atmospheres glovebox.

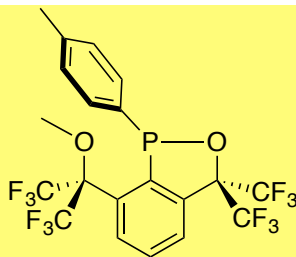

Chemical Formula:  $C_{20}H_{13}F_{12}O_2P$   
Exact Mass: 544.0462  
Molecular Weight: 544.2766  
Elemental Analysis: C, 44.14; H, 2.41; F, 41.89; O, 5.88; P, 5.69

## 2. Simulated $^{19}\text{F}$ NMR Spectra using MestreNova

The  $^{19}\text{F}$  spectra for **5** and **6** were simulated with MestreNova. All  $^{19}\text{F}$  and  $^{31}\text{P}$  spins were included in the simulation along with the aromatic protons. Number of points was matched to the experimental spectrum (16 K to 512 K depending on the experiment). Line widths were set at 0.9 Hz for spectra collected at 282 MHz and 1.1 Hz for spectra collected at 564 MHz.  $^{31}\text{P}$  and  $^1\text{H}$  chemical shifts were set to zero in the  $^{19}\text{F}$  simulations. Initial chemical shifts and coupling constants were estimated from the experimental spectrum then iteratively refined until the simulated pattern matched the experimental pattern. After simulating the  $^{19}\text{F}$  spectra at 282 MHz the resultant coupling constants were tested against the experimental  $^{19}\text{F}$  spectra collected at 564 MHz. The spectra were refined further through slight adjustments to the coupling constants until a suitable match was obtained for the low and high field spectrum.

**Table S1.** Simulated  $^{19}\text{F}$  chemical shifts and coupling constants for **5** at 282 MHz.

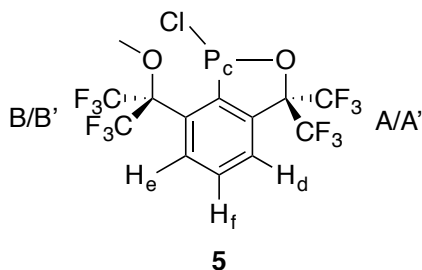

| $^{19}\text{F}$ (ppm) | Label              | CF <sub>3</sub> A | CF <sub>3</sub> A' | CF <sub>3</sub> B | CF <sub>3</sub> B' | P <sub>c</sub> | H <sub>d</sub> | H <sub>e</sub> | H <sub>f</sub> |
|-----------------------|--------------------|-------------------|--------------------|-------------------|--------------------|----------------|----------------|----------------|----------------|
| -68.9237              | CF <sub>3</sub> A  |                   |                    |                   |                    |                |                |                |                |
| -70.4093              | CF <sub>3</sub> A' | 7.93              |                    |                   |                    |                |                |                |                |
| -73.3518              | CF <sub>3</sub> B  |                   |                    |                   |                    |                |                |                |                |
| -76.2722              | CF <sub>3</sub> B' |                   |                    | 9.34              |                    |                |                |                |                |
|                       | P <sub>c</sub>     | 1.65              | 3.86               | 1.9               | 1.77               |                |                |                |                |
|                       | H <sub>d</sub>     | 1.25              | 2.58               |                   |                    |                |                |                |                |
|                       | H <sub>e</sub>     | 0.60              | 0.17               | 1.22              | 1.60               |                |                |                |                |
|                       | H <sub>f</sub>     | 1.35              | 2.25               | 0.25              | 0.35               |                | 0.10           | 0.70           |                |

**Figure S1.** Experimental (red) and simulated (blue)  $^{19}\text{F}$  signals at -68.9237 (A), -70.4093 (B), -73.3518 (C) and -76.2722 (D) for **5** at 282 MHz.

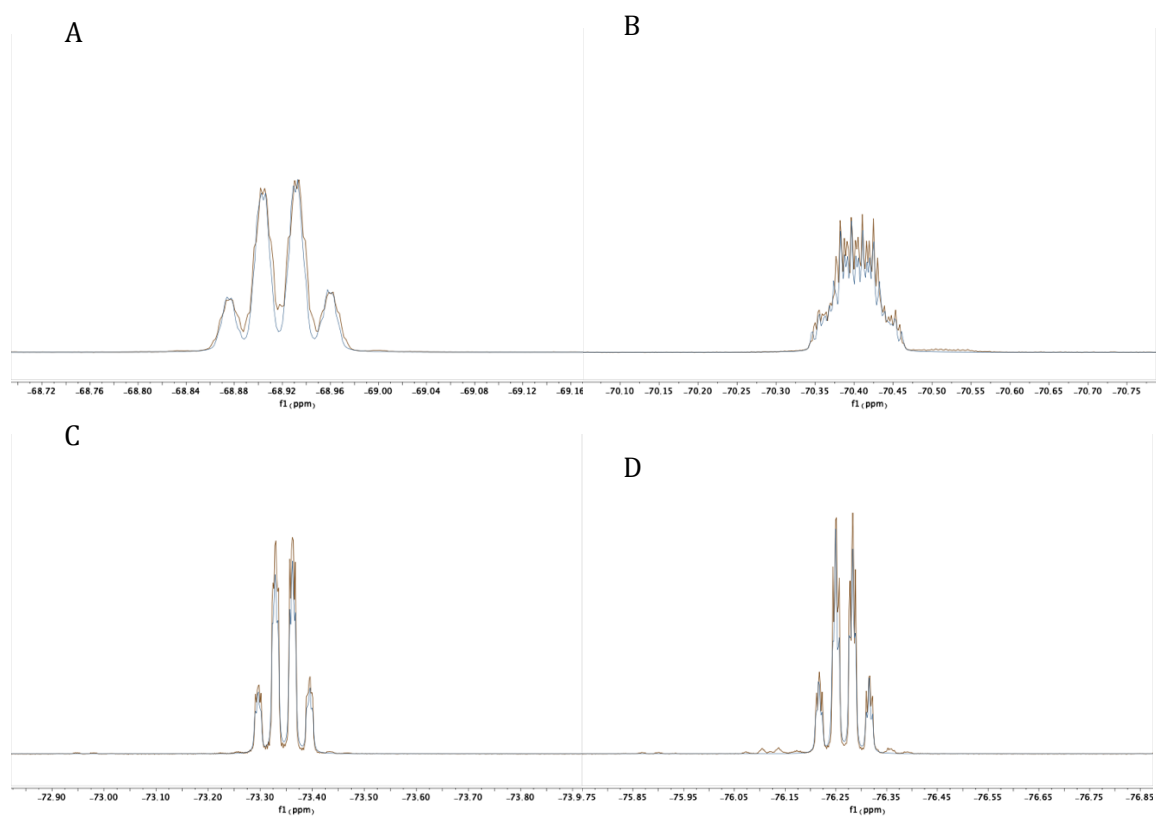

**Figure S2.** Experimental (red) and simulated (blue)  $^{19}\text{F}$  signals at -68.9460 (A), -70.4300 (B), -73.3746 (C) and -76.2950 (D) for 5 at 564 MHz.

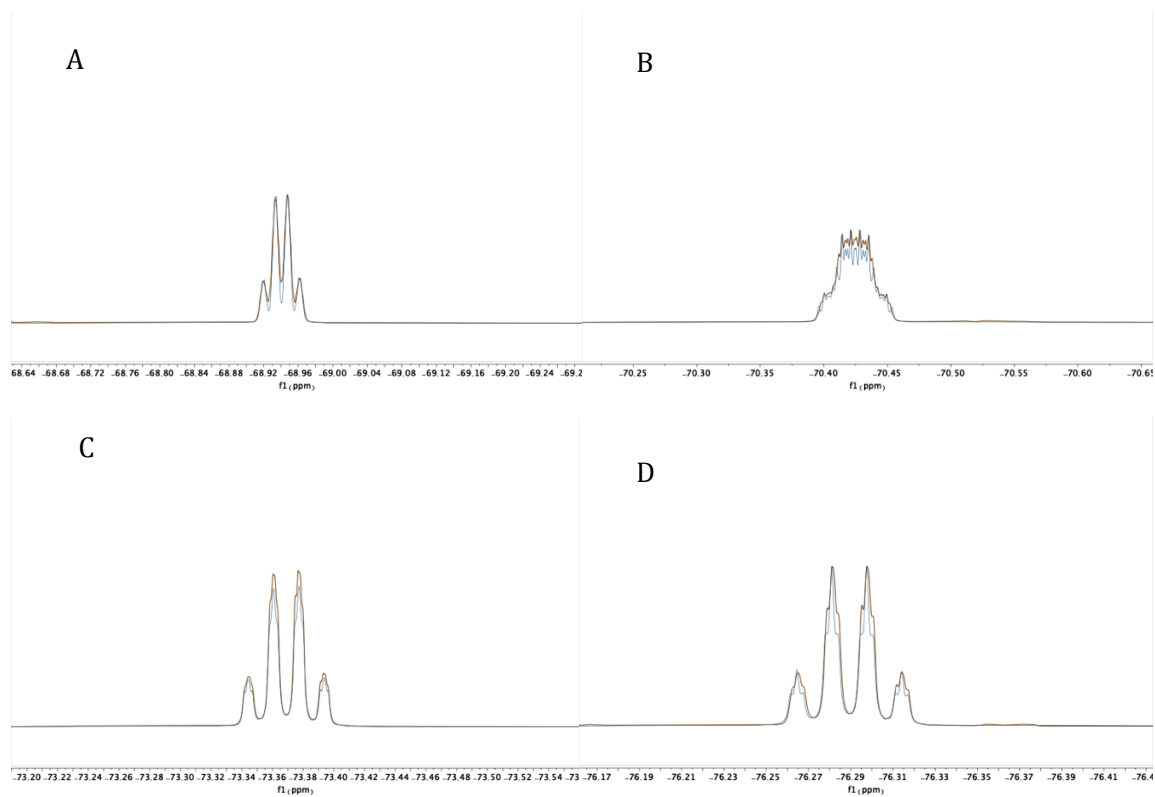

**Table S2.** Simulated  $^{19}\text{F}$  chemical shifts and coupling constants for **6** at 282 MHz.

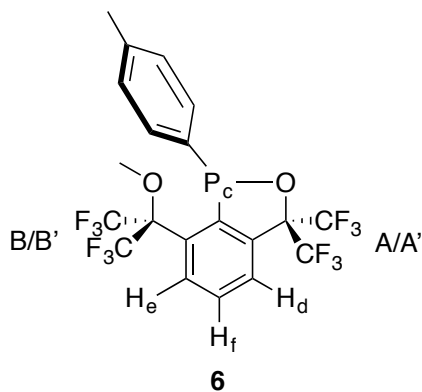

| $^{19}\text{F}$ (ppm) | Label            | $\text{CF}_3$ A | $\text{CF}_3$ A' | $\text{CF}_3$ B | $\text{CF}_3$ B' | $\text{P}_c$ | $\text{H}_d$ | $\text{H}_e$ | $\text{H}_f$ |
|-----------------------|------------------|-----------------|------------------|-----------------|------------------|--------------|--------------|--------------|--------------|
| -68.4819              | $\text{CF}_3$ A  |                 |                  |                 |                  |              |              |              |              |
| -69.6176              | $\text{CF}_3$ A' | 7.90            |                  |                 |                  |              |              |              |              |
| -73.9876              | $\text{CF}_3$ B  |                 |                  |                 |                  |              |              |              |              |
| -76.5368              | $\text{CF}_3$ B' |                 |                  | 9.30            |                  |              |              |              |              |
|                       | $\text{P}_c$     | 2.00            | 7.28             |                 |                  |              |              |              |              |
|                       | $\text{H}_d$     | 1.65            | 2.36             |                 |                  |              |              |              |              |
|                       | $\text{H}_e$     | 0.45            | 0.54             | 0.88            | 5.00             |              |              |              |              |
|                       | $\text{H}_f$     | 0.9             | 1.35             | 0.4             | 1.30             | 0.1          | 0.5          | 0.5          |              |

**Figure S3.** Experimental (red) and simulated (blue)  $^{19}\text{F}$  signals at -69.4819 and -69.6176 (A), -73.9876 (B), and -76.5368 (C) for **6** at 282 MHz.

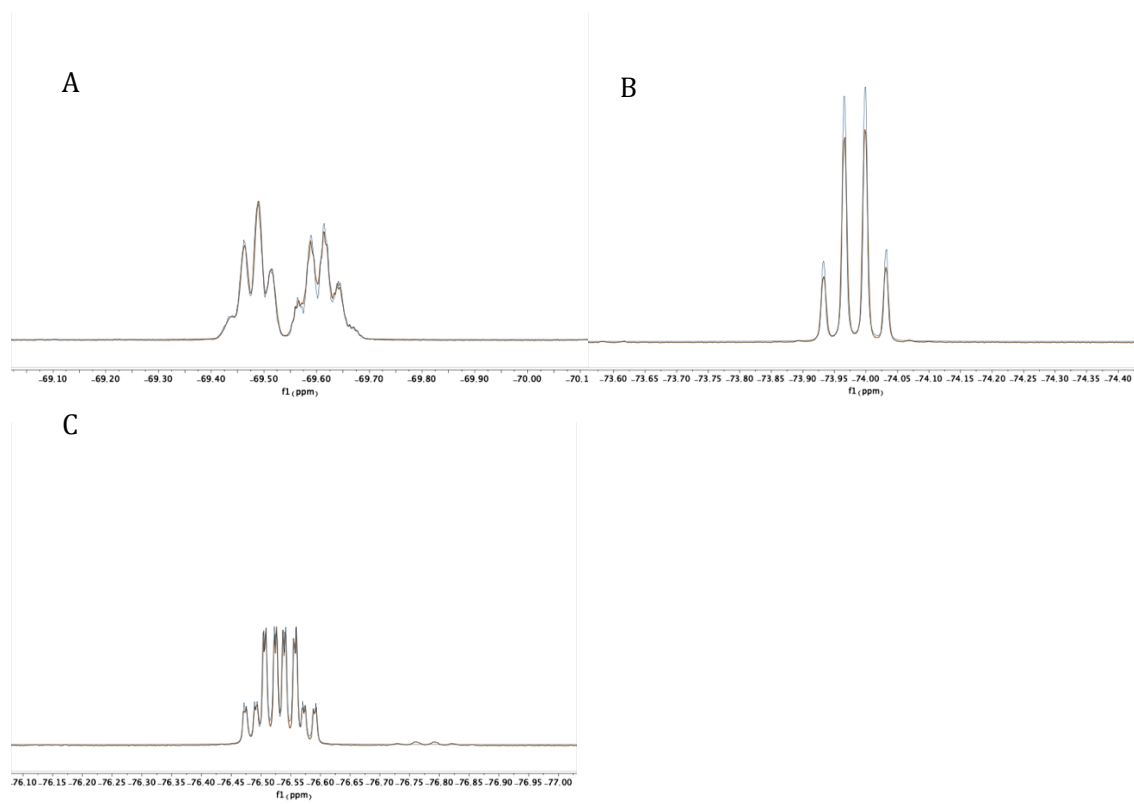

**Figure S4.** Experimental (red) and simulated (blue)  $^{19}\text{F}$  signals at -71.988 and -72.1280 (A), -76.4970 (B), and -79.0490 (C) for **6** at 564 MHz.

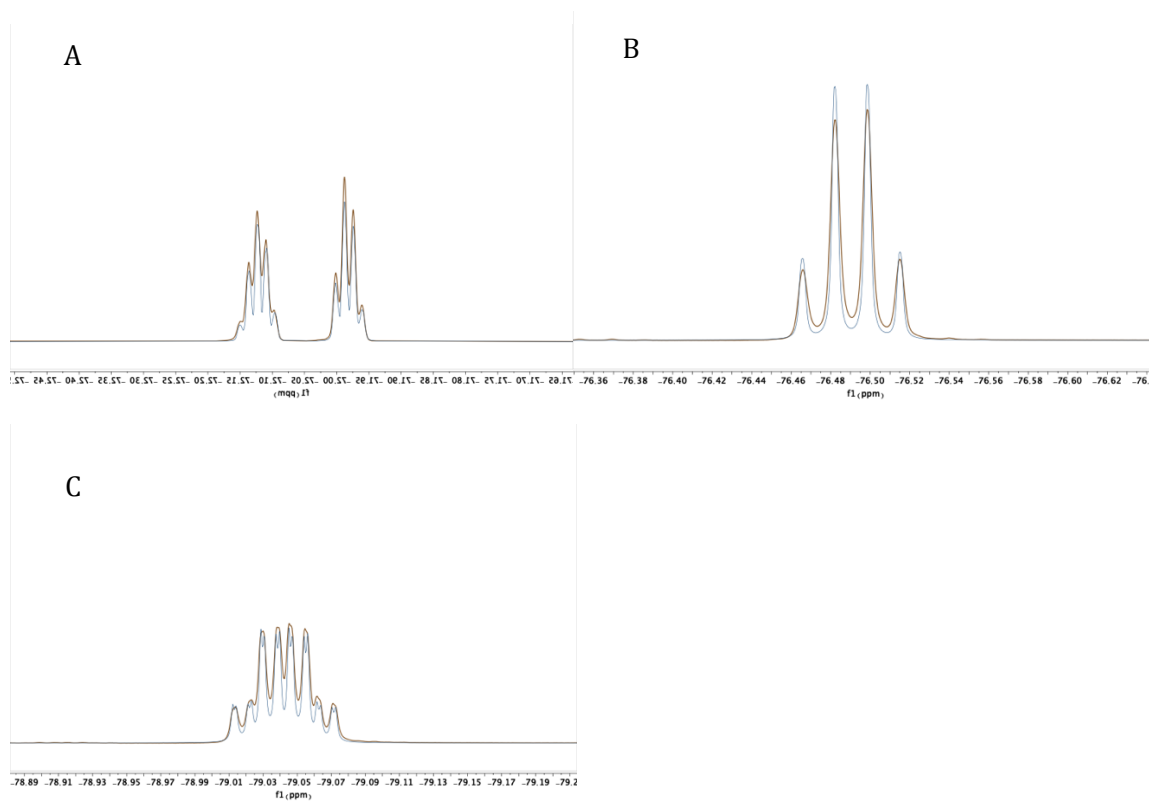

### 3. Experimental Details for Crystal Structure Refinement and Acquisition

All data were collected on Bruker Micro-Star rotating anode systems using micro-focus optics and APEX detectors. All, except CAIN100 (6), were collected using Mo-K $\alpha$  radiation. Cu-K $\alpha$  radiation was used for CAIN100 (6). CAIN58 (3) diffracted only weakly and no high-angle data were available (resolution = 0.86Å). All data sets were processed using current Bruker software and refinement was completed using OLEX2 programs. (1) Pseudo-mirror plane disorder was found in CAIN100 (6).

(1) Dolomanov, O.V.; Bourhis, L.J.; Gildea, R.J.; Howard, J.A.K.; Puschmann, H., OLEX2: A complete structure solution, refinement and analysis program (2009). *J. Appl. Cryst.*, 42, 339-341.



## X-RAY OF 1

Table 1. Crystal data and structure refinement for cain57\_0m\_a (1).

|                                   |                                                   |                  |
|-----------------------------------|---------------------------------------------------|------------------|
| Identification code               | JH154                                             |                  |
| Empirical formula                 | C <sub>26</sub> H <sub>29</sub> Br O <sub>2</sub> |                  |
| Formula weight                    | 453.40                                            |                  |
| Temperature                       | 100.0 K                                           |                  |
| Wavelength                        | 0.71073 Å                                         |                  |
| Crystal system                    | Triclinic                                         |                  |
| Space group                       | P-1                                               |                  |
| Unit cell dimensions              | a = 7.4093(13) Å                                  | α = 101.293(4)°. |
|                                   | b = 8.2707(14) Å                                  | β = 100.471(5)°. |
|                                   | c = 18.706(3) Å                                   | γ = 94.032(6)°.  |
| Volume                            | 1098.7(3) Å <sup>3</sup>                          |                  |
| Z                                 | 2                                                 |                  |
| Density (calculated)              | 1.371 Mg/m <sup>3</sup>                           |                  |
| Absorption coefficient            | 1.890 mm <sup>-1</sup>                            |                  |
| F(000)                            | 472                                               |                  |
| Crystal size                      | 0.32 x 0.3 x 0.28 mm <sup>3</sup>                 |                  |
| Theta range for data collection   | 2.813 to 25.372°.                                 |                  |
| Index ranges                      | -8 ≤ h ≤ 8, -8 ≤ k ≤ 9, -22 ≤ l ≤ 22              |                  |
| Reflections collected             | 11445                                             |                  |
| Independent reflections           | 3990 [R(int) = 0.0341]                            |                  |
| Completeness to theta = 25.242°   | 99.5 %                                            |                  |
| Absorption correction             | Semi-empirical from equivalents                   |                  |
| Max. and min. transmission        | 0.2590 and 0.2112                                 |                  |
| Refinement method                 | Full-matrix least-squares on F <sup>2</sup>       |                  |
| Data / restraints / parameters    | 3990 / 0 / 268                                    |                  |
| Goodness-of-fit on F <sup>2</sup> | 1.092                                             |                  |
| Final R indices [I > 2σ(I)]       | R1 = 0.0465, wR2 = 0.1194                         |                  |
| R indices (all data)              | R1 = 0.0553, wR2 = 0.1231                         |                  |
| Extinction coefficient            | n/a                                               |                  |
| Largest diff. peak and hole       | 2.092 and -0.456 e.Å <sup>-3</sup>                |                  |

Table 2. Atomic coordinates ( $\times 10^4$ ) and equivalent isotropic displacement parameters ( $\text{\AA}^2 \times 10^3$ ) for cain57\_0m\_a (1).  $U(\text{eq})$  is defined as one third of the trace of the orthogonalized  $U^{ij}$  tensor.

|       | x        | y        | z       | $U(\text{eq})$ |
|-------|----------|----------|---------|----------------|
| Br(1) | 2058(1)  | 1429(1)  | 5060(1) | 22(1)          |
| O(1)  | 3198(3)  | 4135(3)  | 6829(1) | 17(1)          |
| O(2)  | 1719(3)  | 2549(3)  | 3248(1) | 18(1)          |
| C(9)  | 4142(5)  | 3949(5)  | 7521(2) | 17(1)          |
| C(18) | 838(5)   | 1614(4)  | 2553(2) | 17(1)          |
| C(13) | 5742(5)  | 5178(5)  | 8762(2) | 24(1)          |
| C(24) | 386(5)   | 4310(5)  | 2127(2) | 23(1)          |
| C(14) | 4820(5)  | 5373(5)  | 8068(2) | 19(1)          |
| C(10) | 4363(5)  | 2357(5)  | 7652(2) | 20(1)          |
| C(17) | 4616(5)  | 7078(5)  | 7915(2) | 24(1)          |
| C(19) | 193(5)   | 2451(5)  | 1989(2) | 19(1)          |
| C(2)  | 3472(5)  | 4811(4)  | 5661(2) | 14(1)          |
| C(12) | 6002(5)  | 3620(5)  | 8905(2) | 26(1)          |
| C(21) | -882(5)  | -224(5)  | 1154(2) | 24(1)          |
| C(6)  | 1519(5)  | 4236(4)  | 4410(2) | 15(1)          |
| C(5)  | 1739(5)  | 5923(4)  | 4417(2) | 18(1)          |
| C(20) | -663(5)  | 1495(5)  | 1296(2) | 23(1)          |
| C(23) | 678(5)   | -109(5)  | 2425(2) | 20(1)          |
| C(8)  | 438(5)   | 3069(4)  | 3723(2) | 18(1)          |
| C(11) | 5307(5)  | 2227(5)  | 8346(2) | 25(1)          |
| C(7)  | 2378(5)  | 3714(4)  | 5038(2) | 14(1)          |
| C(3)  | 3678(5)  | 6474(4)  | 5627(2) | 17(1)          |
| C(15) | 3635(6)  | 824(5)   | 7058(2) | 27(1)          |
| C(1)  | 4457(5)  | 4257(4)  | 6333(2) | 16(1)          |
| C(4)  | 2820(5)  | 7032(4)  | 5021(2) | 20(1)          |
| C(22) | -183(6)  | -1003(5) | 1723(2) | 26(1)          |
| C(26) | 1386(6)  | -1006(5) | 3031(2) | 28(1)          |
| C(25) | -1889(6) | -1229(6) | 403(2)  | 37(1)          |
| C(16) | 7060(6)  | 3434(6)  | 9649(2) | 37(1)          |

Table 3. Bond lengths [Å] and angles [°] for cain57\_0m\_a (1).

---

|              |          |
|--------------|----------|
| Br(1)-C(7)   | 1.897(3) |
| O(1)-C(9)    | 1.397(4) |
| O(1)-C(1)    | 1.443(4) |
| O(2)-C(18)   | 1.393(4) |
| O(2)-C(8)    | 1.445(4) |
| C(9)-C(14)   | 1.395(5) |
| C(9)-C(10)   | 1.401(5) |
| C(18)-C(19)  | 1.403(5) |
| C(18)-C(23)  | 1.391(5) |
| C(13)-H(13)  | 0.9500   |
| C(13)-C(14)  | 1.396(5) |
| C(13)-C(12)  | 1.386(6) |
| C(24)-H(24A) | 0.9800   |
| C(24)-H(24B) | 0.9800   |
| C(24)-H(24C) | 0.9800   |
| C(24)-C(19)  | 1.501(5) |
| C(14)-C(17)  | 1.506(5) |
| C(10)-C(11)  | 1.387(5) |
| C(10)-C(15)  | 1.506(5) |
| C(17)-H(17A) | 0.9800   |
| C(17)-H(17B) | 0.9800   |
| C(17)-H(17C) | 0.9800   |
| C(19)-C(20)  | 1.391(5) |
| C(2)-C(7)    | 1.406(5) |
| C(2)-C(3)    | 1.389(5) |
| C(2)-C(1)    | 1.503(5) |
| C(12)-C(11)  | 1.391(6) |
| C(12)-C(16)  | 1.510(5) |
| C(21)-C(20)  | 1.387(5) |
| C(21)-C(22)  | 1.389(6) |
| C(21)-C(25)  | 1.516(5) |
| C(6)-C(5)    | 1.390(5) |
| C(6)-C(8)    | 1.502(5) |
| C(6)-C(7)    | 1.392(5) |

|                   |          |
|-------------------|----------|
| C(5)-H(5)         | 0.9500   |
| C(5)-C(4)         | 1.386(5) |
| C(20)-H(20)       | 0.9500   |
| C(23)-C(22)       | 1.388(5) |
| C(23)-C(26)       | 1.510(5) |
| C(8)-H(8A)        | 0.9900   |
| C(8)-H(8B)        | 0.9900   |
| C(11)-H(11)       | 0.9500   |
| C(3)-H(3)         | 0.9500   |
| C(3)-C(4)         | 1.374(5) |
| C(15)-H(15A)      | 0.9800   |
| C(15)-H(15B)      | 0.9800   |
| C(15)-H(15C)      | 0.9800   |
| C(1)-H(1A)        | 0.9900   |
| C(1)-H(1B)        | 0.9900   |
| C(4)-H(4)         | 0.9500   |
| C(22)-H(22)       | 0.9500   |
| C(26)-H(26A)      | 0.9800   |
| C(26)-H(26B)      | 0.9800   |
| C(26)-H(26C)      | 0.9800   |
| C(25)-H(25A)      | 0.9800   |
| C(25)-H(25B)      | 0.9800   |
| C(25)-H(25C)      | 0.9800   |
| C(16)-H(16A)      | 0.9800   |
| C(16)-H(16B)      | 0.9800   |
| C(16)-H(16C)      | 0.9800   |
| C(9)-O(1)-C(1)    | 110.7(2) |
| C(18)-O(2)-C(8)   | 112.6(3) |
| O(1)-C(9)-C(10)   | 119.7(3) |
| C(14)-C(9)-O(1)   | 118.4(3) |
| C(14)-C(9)-C(10)  | 121.8(3) |
| O(2)-C(18)-C(19)  | 118.5(3) |
| C(23)-C(18)-O(2)  | 119.8(3) |
| C(23)-C(18)-C(19) | 121.7(3) |
| C(14)-C(13)-H(13) | 119.3    |

|                     |          |
|---------------------|----------|
| C(12)-C(13)-H(13)   | 119.3    |
| C(12)-C(13)-C(14)   | 121.4(4) |
| H(24A)-C(24)-H(24B) | 109.5    |
| H(24A)-C(24)-H(24C) | 109.5    |
| H(24B)-C(24)-H(24C) | 109.5    |
| C(19)-C(24)-H(24A)  | 109.5    |
| C(19)-C(24)-H(24B)  | 109.5    |
| C(19)-C(24)-H(24C)  | 109.5    |
| C(9)-C(14)-C(13)    | 118.1(3) |
| C(9)-C(14)-C(17)    | 121.3(3) |
| C(13)-C(14)-C(17)   | 120.6(3) |
| C(9)-C(10)-C(15)    | 121.6(3) |
| C(11)-C(10)-C(9)    | 117.9(3) |
| C(11)-C(10)-C(15)   | 120.4(3) |
| C(14)-C(17)-H(17A)  | 109.5    |
| C(14)-C(17)-H(17B)  | 109.5    |
| C(14)-C(17)-H(17C)  | 109.5    |
| H(17A)-C(17)-H(17B) | 109.5    |
| H(17A)-C(17)-H(17C) | 109.5    |
| H(17B)-C(17)-H(17C) | 109.5    |
| C(18)-C(19)-C(24)   | 121.5(3) |
| C(20)-C(19)-C(18)   | 117.7(3) |
| C(20)-C(19)-C(24)   | 120.8(3) |
| C(7)-C(2)-C(1)      | 123.3(3) |
| C(3)-C(2)-C(7)      | 116.9(3) |
| C(3)-C(2)-C(1)      | 119.7(3) |
| C(13)-C(12)-C(11)   | 118.9(4) |
| C(13)-C(12)-C(16)   | 120.7(4) |
| C(11)-C(12)-C(16)   | 120.4(4) |
| C(20)-C(21)-C(22)   | 118.4(3) |
| C(20)-C(21)-C(25)   | 120.8(4) |
| C(22)-C(21)-C(25)   | 120.8(4) |
| C(5)-C(6)-C(8)      | 119.0(3) |
| C(5)-C(6)-C(7)      | 117.6(3) |
| C(7)-C(6)-C(8)      | 123.4(3) |
| C(6)-C(5)-H(5)      | 119.5    |

|                     |          |
|---------------------|----------|
| C(4)-C(5)-C(6)      | 121.0(3) |
| C(4)-C(5)-H(5)      | 119.5    |
| C(19)-C(20)-H(20)   | 118.9    |
| C(21)-C(20)-C(19)   | 122.1(4) |
| C(21)-C(20)-H(20)   | 118.9    |
| C(18)-C(23)-C(26)   | 121.6(3) |
| C(22)-C(23)-C(18)   | 118.3(3) |
| C(22)-C(23)-C(26)   | 120.1(3) |
| O(2)-C(8)-C(6)      | 107.5(3) |
| O(2)-C(8)-H(8A)     | 110.2    |
| O(2)-C(8)-H(8B)     | 110.2    |
| C(6)-C(8)-H(8A)     | 110.2    |
| C(6)-C(8)-H(8B)     | 110.2    |
| H(8A)-C(8)-H(8B)    | 108.5    |
| C(10)-C(11)-C(12)   | 121.8(4) |
| C(10)-C(11)-H(11)   | 119.1    |
| C(12)-C(11)-H(11)   | 119.1    |
| C(2)-C(7)-Br(1)     | 118.3(3) |
| C(6)-C(7)-Br(1)     | 118.9(3) |
| C(6)-C(7)-C(2)      | 122.8(3) |
| C(2)-C(3)-H(3)      | 119.2    |
| C(4)-C(3)-C(2)      | 121.7(3) |
| C(4)-C(3)-H(3)      | 119.2    |
| C(10)-C(15)-H(15A)  | 109.5    |
| C(10)-C(15)-H(15B)  | 109.5    |
| C(10)-C(15)-H(15C)  | 109.5    |
| H(15A)-C(15)-H(15B) | 109.5    |
| H(15A)-C(15)-H(15C) | 109.5    |
| H(15B)-C(15)-H(15C) | 109.5    |
| O(1)-C(1)-C(2)      | 109.0(3) |
| O(1)-C(1)-H(1A)     | 109.9    |
| O(1)-C(1)-H(1B)     | 109.9    |
| C(2)-C(1)-H(1A)     | 109.9    |
| C(2)-C(1)-H(1B)     | 109.9    |
| H(1A)-C(1)-H(1B)    | 108.3    |
| C(5)-C(4)-H(4)      | 120.0    |

|                     |          |
|---------------------|----------|
| C(3)-C(4)-C(5)      | 120.1(3) |
| C(3)-C(4)-H(4)      | 120.0    |
| C(21)-C(22)-H(22)   | 119.1    |
| C(23)-C(22)-C(21)   | 121.8(4) |
| C(23)-C(22)-H(22)   | 119.1    |
| C(23)-C(26)-H(26A)  | 109.5    |
| C(23)-C(26)-H(26B)  | 109.5    |
| C(23)-C(26)-H(26C)  | 109.5    |
| H(26A)-C(26)-H(26B) | 109.5    |
| H(26A)-C(26)-H(26C) | 109.5    |
| H(26B)-C(26)-H(26C) | 109.5    |
| C(21)-C(25)-H(25A)  | 109.5    |
| C(21)-C(25)-H(25B)  | 109.5    |
| C(21)-C(25)-H(25C)  | 109.5    |
| H(25A)-C(25)-H(25B) | 109.5    |
| H(25A)-C(25)-H(25C) | 109.5    |
| H(25B)-C(25)-H(25C) | 109.5    |
| C(12)-C(16)-H(16A)  | 109.5    |
| C(12)-C(16)-H(16B)  | 109.5    |
| C(12)-C(16)-H(16C)  | 109.5    |
| H(16A)-C(16)-H(16B) | 109.5    |
| H(16A)-C(16)-H(16C) | 109.5    |
| H(16B)-C(16)-H(16C) | 109.5    |

---

Symmetry transformations used to generate equivalent atoms:

Table 4. Anisotropic displacement parameters ( $\text{\AA}^2 \times 10^3$ ) for cain57\_0m\_a (1). The anisotropic displacement factor exponent takes the form:  $-2\pi^2 [ h^2 a^{*2} U^{11} + \dots + 2 h k a^* b^* U^{12} ]$

|       | U <sup>11</sup> | U <sup>22</sup> | U <sup>33</sup> | U <sup>23</sup> | U <sup>13</sup> | U <sup>12</sup> |
|-------|-----------------|-----------------|-----------------|-----------------|-----------------|-----------------|
| Br(1) | 33(1)           | 12(1)           | 20(1)           | 4(1)            | 1(1)            | -1(1)           |
| O(1)  | 15(1)           | 24(1)           | 13(1)           | 7(1)            | 3(1)            | 2(1)            |
| O(2)  | 14(1)           | 24(1)           | 14(1)           | 0(1)            | 3(1)            | 4(1)            |
| C(9)  | 13(2)           | 26(2)           | 13(2)           | 4(1)            | 3(1)            | 2(1)            |
| C(18) | 12(2)           | 25(2)           | 11(2)           | -2(1)           | 1(1)            | -1(1)           |
| C(13) | 20(2)           | 35(2)           | 16(2)           | 2(2)            | 4(2)            | 2(2)            |
| C(24) | 24(2)           | 24(2)           | 22(2)           | 6(2)            | 4(2)            | 2(2)            |
| C(14) | 16(2)           | 24(2)           | 17(2)           | 3(2)            | 6(2)            | 4(2)            |
| C(10) | 20(2)           | 23(2)           | 20(2)           | 5(2)            | 7(2)            | 3(2)            |
| C(17) | 25(2)           | 21(2)           | 24(2)           | 0(2)            | 6(2)            | 2(2)            |
| C(19) | 16(2)           | 24(2)           | 17(2)           | 5(2)            | 6(2)            | 3(2)            |
| C(2)  | 12(2)           | 16(2)           | 14(2)           | 1(1)            | 5(1)            | 2(1)            |
| C(12) | 22(2)           | 41(2)           | 17(2)           | 9(2)            | 4(2)            | 5(2)            |
| C(21) | 23(2)           | 29(2)           | 18(2)           | -4(2)           | 6(2)            | -3(2)           |
| C(6)  | 10(2)           | 21(2)           | 16(2)           | 3(1)            | 6(1)            | 3(1)            |
| C(5)  | 20(2)           | 24(2)           | 15(2)           | 8(2)            | 6(2)            | 8(2)            |
| C(20) | 24(2)           | 31(2)           | 14(2)           | 5(2)            | 3(2)            | 5(2)            |
| C(23) | 21(2)           | 23(2)           | 20(2)           | 6(2)            | 8(2)            | 4(2)            |
| C(8)  | 14(2)           | 25(2)           | 14(2)           | 4(2)            | 2(1)            | 3(1)            |
| C(11) | 28(2)           | 27(2)           | 24(2)           | 12(2)           | 7(2)            | 7(2)            |
| C(7)  | 15(2)           | 10(2)           | 17(2)           | 2(1)            | 7(1)            | 2(1)            |
| C(3)  | 20(2)           | 15(2)           | 18(2)           | 0(1)            | 7(2)            | 1(1)            |
| C(15) | 31(2)           | 21(2)           | 28(2)           | 5(2)            | 6(2)            | -1(2)           |
| C(1)  | 14(2)           | 18(2)           | 16(2)           | 3(1)            | 4(1)            | 1(1)            |
| C(4)  | 24(2)           | 14(2)           | 25(2)           | 6(2)            | 10(2)           | 4(2)            |
| C(22) | 33(2)           | 19(2)           | 24(2)           | -2(2)           | 10(2)           | 0(2)            |
| C(26) | 36(2)           | 28(2)           | 23(2)           | 9(2)            | 6(2)            | 12(2)           |
| C(25) | 39(3)           | 42(3)           | 21(2)           | -7(2)           | 1(2)            | -5(2)           |
| C(16) | 37(3)           | 51(3)           | 23(2)           | 16(2)           | -1(2)           | 6(2)            |



Table 5. Hydrogen coordinates ( $\times 10^4$ ) and isotropic displacement parameters ( $\text{\AA}^2 \times 10^{-3}$ ) for cain57\_0m\_a (1).

|        | x     | y     | z     | U(eq) |
|--------|-------|-------|-------|-------|
| H(13)  | 6202  | 6133  | 9143  | 29    |
| H(24A) | -582  | 4731  | 2383  | 35    |
| H(24B) | 264   | 4661  | 1651  | 35    |
| H(24C) | 1600  | 4753  | 2436  | 35    |
| H(17A) | 5573  | 7379  | 7651  | 36    |
| H(17B) | 4746  | 7883  | 8386  | 36    |
| H(17C) | 3395  | 7082  | 7608  | 36    |
| H(5)   | 1139  | 6320  | 4002  | 22    |
| H(20)  | -1112 | 2038  | 907   | 27    |
| H(8A)  | -164  | 2095  | 3857  | 21    |
| H(8B)  | -530  | 3634  | 3463  | 21    |
| H(11)  | 5483  | 1158  | 8443  | 30    |
| H(3)   | 4431  | 7246  | 6033  | 21    |
| H(15A) | 2684  | 1098  | 6676  | 40    |
| H(15B) | 3100  | -26   | 7280  | 40    |
| H(15C) | 4648  | 403   | 6830  | 40    |
| H(1A)  | 4900  | 3166  | 6178  | 19    |
| H(1B)  | 5540  | 5066  | 6590  | 19    |
| H(4)   | 2967  | 8180  | 5015  | 24    |
| H(22)  | -298  | -2181 | 1629  | 31    |
| H(26A) | 2231  | -233  | 3438  | 42    |
| H(26B) | 2042  | -1924 | 2830  | 42    |
| H(26C) | 343   | -1444 | 3219  | 42    |
| H(25A) | -2900 | -640  | 202   | 55    |
| H(25B) | -2391 | -2314 | 459   | 55    |
| H(25C) | -1026 | -1381 | 61    | 55    |
| H(16A) | 8368  | 3818  | 9700  | 56    |
| H(16B) | 6932  | 2264  | 9682  | 56    |
| H(16C) | 6566  | 4098  | 10049 | 56    |

## X-RAY OF “HALF TRIFLUOROMETHYLATED”

Table 1. Crystal data and structure refinement for cain80\_0m\_a (“HALF”).

|                                   |                                             |                              |
|-----------------------------------|---------------------------------------------|------------------------------|
| Identification code               | RC.BIZ                                      |                              |
| Empirical formula                 | C11 H7 Br F6 O3                             |                              |
| Formula weight                    | 381.08                                      |                              |
| Temperature                       | 100.0 K                                     |                              |
| Wavelength                        | 0.71073 Å                                   |                              |
| Crystal system                    | Monoclinic                                  |                              |
| Space group                       | C c                                         |                              |
| Unit cell dimensions              | a = 13.9233(7) Å                            | $\alpha = 90^\circ$ .        |
|                                   | b = 14.4415(9) Å                            | $\beta = 100.826(2)^\circ$ . |
|                                   | c = 12.9349(7) Å                            | $\gamma = 90^\circ$ .        |
| Volume                            | 2554.6(2) Å <sup>3</sup>                    |                              |
| Z                                 | 8                                           |                              |
| Density (calculated)              | 1.982 Mg/m <sup>3</sup>                     |                              |
| Absorption coefficient            | 3.300 mm <sup>-1</sup>                      |                              |
| F(000)                            | 1488                                        |                              |
| Crystal size                      | 0.32 x 0.31 x 0.28 mm <sup>3</sup>          |                              |
| Theta range for data collection   | 2.051 to 28.287°.                           |                              |
| Index ranges                      | -16<=h<=18, -19<=k<=16, -16<=l<=17          |                              |
| Reflections collected             | 8847                                        |                              |
| Independent reflections           | 4616 [R(int) = 0.0348]                      |                              |
| Completeness to theta = 25.000°   | 99.9 %                                      |                              |
| Absorption correction             | Semi-empirical from equivalents             |                              |
| Max. and min. transmission        | 0.7457 and 0.5761                           |                              |
| Refinement method                 | Full-matrix least-squares on F <sup>2</sup> |                              |
| Data / restraints / parameters    | 4616 / 2 / 386                              |                              |
| Goodness-of-fit on F <sup>2</sup> | 0.833                                       |                              |
| Final R indices [I>2sigma(I)]     | R1 = 0.0230, wR2 = 0.0533                   |                              |
| R indices (all data)              | R1 = 0.0251, wR2 = 0.0541                   |                              |
| Absolute structure parameter      | 0.007(5)                                    |                              |
| Extinction coefficient            | n/a                                         |                              |
| Largest diff. peak and hole       | 0.414 and -0.312 e.Å <sup>-3</sup>          |                              |

Table 2. Atomic coordinates ( $\times 10^4$ ) and equivalent isotropic displacement parameters ( $\text{\AA}^2 \times 10^3$ ) for cain80\_0m\_a (“HALF”).  $U(\text{eq})$  is defined as one third of the trace of the orthogonalized  $U^{ij}$  tensor.

|        | x       | y        | z       | $U(\text{eq})$ |
|--------|---------|----------|---------|----------------|
| Br(1') | 5669(1) | 5628(1)  | 6811(1) | 14(1)          |
| Br(1)  | 5256(1) | 1266(1)  | 6661(1) | 14(1)          |
| F(1)   | 5475(2) | -755(2)  | 5767(2) | 19(1)          |
| F(4')  | 2685(2) | 6101(2)  | 4523(2) | 23(1)          |
| F(2')  | 2736(2) | 4670(2)  | 3218(2) | 23(1)          |
| F(4)   | 3386(2) | -766(2)  | 3017(2) | 23(1)          |
| F(6')  | 3417(2) | 5943(2)  | 6139(2) | 23(1)          |
| O(1')  | 4166(2) | 4280(2)  | 5760(2) | 14(1)          |
| F(6)   | 2601(2) | 365(2)   | 3590(2) | 21(1)          |
| F(3)   | 4336(2) | -1719(2) | 5146(2) | 23(1)          |
| O(1)   | 3687(2) | -25(2)   | 5679(2) | 14(1)          |
| F(1')  | 4032(2) | 3812(2)  | 3564(2) | 22(1)          |
| O(3)   | 5924(2) | 3525(2)  | 5804(2) | 20(1)          |
| F(2)   | 5198(2) | -1092(2) | 4116(2) | 23(1)          |
| O(3')  | 7750(2) | 6609(2)  | 5833(2) | 18(1)          |
| F(3')  | 2821(2) | 3569(2)  | 4340(2) | 28(1)          |
| F(5)   | 2584(2) | -996(2)  | 4257(2) | 24(1)          |
| O(2)   | 7081(2) | 2437(2)  | 6001(2) | 16(1)          |
| O(2')  | 6683(2) | 7612(2)  | 6297(2) | 15(1)          |
| F(5')  | 2288(2) | 4985(2)  | 5464(2) | 32(1)          |
| C(10)  | 6211(2) | 2765(2)  | 5604(2) | 12(1)          |
| C(11') | 7487(2) | 8046(3)  | 7012(3) | 19(1)          |
| C(11)  | 7693(2) | 3018(3)  | 6772(3) | 19(1)          |
| C(10') | 6923(2) | 6889(2)  | 5762(2) | 12(1)          |
| C(5')  | 5403(2) | 5886(2)  | 5345(2) | 11(1)          |
| C(9)   | 4632(2) | 886(3)   | 3376(3) | 14(1)          |
| C(8)   | 5130(2) | 1629(3)  | 3045(3) | 15(1)          |
| C(3)   | 4774(3) | -937(3)  | 4945(3) | 16(1)          |
| C(4')  | 4622(2) | 5516(2)  | 4612(3) | 10(1)          |
| C(5)   | 5130(2) | 1355(2)  | 5178(2) | 10(1)          |
| C(4)   | 4602(2) | 738(2)   | 4441(2) | 10(1)          |

|       |         |         |         |       |
|-------|---------|---------|---------|-------|
| C(6)  | 5633(2) | 2104(2) | 4833(3) | 12(1) |
| C(9') | 4529(2) | 5805(2) | 3567(3) | 14(1) |
| C(2') | 3835(2) | 4872(2) | 4916(3) | 12(1) |
| C(7') | 5938(2) | 6781(3) | 3974(3) | 15(1) |
| C(6') | 6061(2) | 6507(2) | 5014(3) | 11(1) |
| C(8') | 5169(3) | 6434(3) | 3242(3) | 16(1) |
| C(3') | 3339(3) | 4235(3) | 3989(3) | 18(1) |
| C(1') | 3041(3) | 5484(3) | 5266(3) | 18(1) |
| C(2)  | 4052(2) | -115(2) | 4749(2) | 12(1) |
| C(1)  | 3148(3) | -381(3) | 3887(3) | 17(1) |
| C(7)  | 5624(2) | 2247(2) | 3776(3) | 14(1) |

---

Table 3. Bond lengths [ $\text{\AA}$ ] and angles [ $^\circ$ ] for cain80\_0m\_a (“HALF”).

---

|               |          |
|---------------|----------|
| Br(1')-C(5')  | 1.900(3) |
| Br(1)-C(5)    | 1.898(3) |
| F(1)-C(3)     | 1.327(4) |
| F(4')-C(1')   | 1.336(4) |
| F(2')-C(3')   | 1.334(4) |
| F(4)-C(1)     | 1.352(4) |
| F(6')-C(1')   | 1.330(4) |
| O(1')-H(1')   | 0.8400   |
| O(1')-C(2')   | 1.395(4) |
| F(6)-C(1)     | 1.333(4) |
| F(3)-C(3)     | 1.332(4) |
| O(1)-C(2)     | 1.396(4) |
| O(1)-H(1)     | 0.78(4)  |
| F(1')-C(3')   | 1.344(4) |
| O(3)-C(10)    | 1.211(4) |
| F(2)-C(3)     | 1.336(4) |
| O(3')-C(10')  | 1.208(4) |
| F(3')-C(3')   | 1.333(4) |
| F(5)-C(1)     | 1.332(4) |
| O(2)-C(10)    | 1.312(4) |
| O(2)-C(11)    | 1.451(4) |
| O(2')-C(11')  | 1.453(4) |
| O(2')-C(10')  | 1.329(4) |
| F(5')-C(1')   | 1.336(4) |
| C(10)-C(6)    | 1.502(5) |
| C(11')-H(11A) | 0.9800   |
| C(11')-H(11B) | 0.9800   |
| C(11')-H(11C) | 0.9800   |
| C(11)-H(11D)  | 0.9800   |
| C(11)-H(11E)  | 0.9800   |
| C(11)-H(11F)  | 0.9800   |
| C(10')-C(6')  | 1.498(5) |
| C(5')-C(4')   | 1.407(5) |
| C(5')-C(6')   | 1.405(4) |

|             |          |
|-------------|----------|
| C(9)-H(9)   | 0.9500   |
| C(9)-C(8)   | 1.388(5) |
| C(9)-C(4)   | 1.403(4) |
| C(8)-H(8)   | 0.9500   |
| C(8)-C(7)   | 1.385(5) |
| C(3)-C(2)   | 1.546(5) |
| C(4')-C(9') | 1.396(4) |
| C(4')-C(2') | 1.544(4) |
| C(5)-C(4)   | 1.408(5) |
| C(5)-C(6)   | 1.406(5) |
| C(4)-C(2)   | 1.542(4) |
| C(6)-C(7)   | 1.380(4) |
| C(9')-H(9') | 0.9500   |
| C(9')-C(8') | 1.392(5) |
| C(2')-C(3') | 1.565(5) |
| C(2')-C(1') | 1.547(5) |
| C(7')-H(7') | 0.9500   |
| C(7')-C(6') | 1.383(5) |
| C(7')-C(8') | 1.383(5) |
| C(8')-H(8') | 0.9500   |
| C(2)-C(1)   | 1.565(5) |
| C(7)-H(7)   | 0.9500   |

|                      |          |
|----------------------|----------|
| C(2')-O(1')-H(1')    | 109.5    |
| C(2)-O(1)-H(1)       | 108(3)   |
| C(10)-O(2)-C(11)     | 116.1(3) |
| C(10')-O(2')-C(11')  | 115.5(3) |
| O(3)-C(10)-O(2)      | 124.1(3) |
| O(3)-C(10)-C(6)      | 124.1(3) |
| O(2)-C(10)-C(6)      | 111.7(3) |
| O(2')-C(11')-H(11A)  | 109.5    |
| O(2')-C(11')-H(11B)  | 109.5    |
| O(2')-C(11')-H(11C)  | 109.5    |
| H(11A)-C(11')-H(11B) | 109.5    |
| H(11A)-C(11')-H(11C) | 109.5    |
| H(11B)-C(11')-H(11C) | 109.5    |

|                     |          |
|---------------------|----------|
| O(2)-C(11)-H(11D)   | 109.5    |
| O(2)-C(11)-H(11E)   | 109.5    |
| O(2)-C(11)-H(11F)   | 109.5    |
| H(11D)-C(11)-H(11E) | 109.5    |
| H(11D)-C(11)-H(11F) | 109.5    |
| H(11E)-C(11)-H(11F) | 109.5    |
| O(3')-C(10')-O(2')  | 123.6(3) |
| O(3')-C(10')-C(6')  | 124.2(3) |
| O(2')-C(10')-C(6')  | 112.1(3) |
| C(4')-C(5')-Br(1')  | 125.4(2) |
| C(6')-C(5')-Br(1')  | 114.4(2) |
| C(6')-C(5')-C(4')   | 120.2(3) |
| C(8)-C(9)-H(9)      | 119.0    |
| C(8)-C(9)-C(4)      | 121.9(3) |
| C(4)-C(9)-H(9)      | 119.0    |
| C(9)-C(8)-H(8)      | 120.0    |
| C(7)-C(8)-C(9)      | 120.1(3) |
| C(7)-C(8)-H(8)      | 120.0    |
| F(1)-C(3)-F(3)      | 107.9(3) |
| F(1)-C(3)-F(2)      | 107.9(3) |
| F(1)-C(3)-C(2)      | 109.7(3) |
| F(3)-C(3)-F(2)      | 107.6(3) |
| F(3)-C(3)-C(2)      | 112.0(3) |
| F(2)-C(3)-C(2)      | 111.6(3) |
| C(5')-C(4')-C(2')   | 123.6(3) |
| C(9')-C(4')-C(5')   | 117.3(3) |
| C(9')-C(4')-C(2')   | 119.0(3) |
| C(4)-C(5)-Br(1)     | 125.4(2) |
| C(6)-C(5)-Br(1)     | 114.6(2) |
| C(6)-C(5)-C(4)      | 120.0(3) |
| C(9)-C(4)-C(5)      | 117.4(3) |
| C(9)-C(4)-C(2)      | 118.9(3) |
| C(5)-C(4)-C(2)      | 123.5(3) |
| C(5)-C(6)-C(10)     | 121.0(3) |
| C(7)-C(6)-C(10)     | 117.8(3) |
| C(7)-C(6)-C(5)      | 121.2(3) |

|                    |          |
|--------------------|----------|
| C(4')-C(9')-H(9')  | 118.7    |
| C(8')-C(9')-C(4')  | 122.6(3) |
| C(8')-C(9')-H(9')  | 118.7    |
| O(1')-C(2')-C(4')  | 115.0(3) |
| O(1')-C(2')-C(3')  | 105.8(3) |
| O(1')-C(2')-C(1')  | 105.6(3) |
| C(4')-C(2')-C(3')  | 113.0(3) |
| C(4')-C(2')-C(1')  | 108.1(3) |
| C(1')-C(2')-C(3')  | 108.9(3) |
| C(6')-C(7')-H(7')  | 120.0    |
| C(6')-C(7')-C(8')  | 120.0(3) |
| C(8')-C(7')-H(7')  | 120.0    |
| C(5')-C(6')-C(10') | 121.9(3) |
| C(7')-C(6')-C(10') | 117.4(3) |
| C(7')-C(6')-C(5')  | 120.7(3) |
| C(9')-C(8')-H(8')  | 120.4    |
| C(7')-C(8')-C(9')  | 119.2(3) |
| C(7')-C(8')-H(8')  | 120.4    |
| F(2')-C(3')-F(1')  | 107.9(3) |
| F(2')-C(3')-C(2')  | 114.9(3) |
| F(1')-C(3')-C(2')  | 109.5(3) |
| F(3')-C(3')-F(2')  | 106.8(3) |
| F(3')-C(3')-F(1')  | 106.7(3) |
| F(3')-C(3')-C(2')  | 110.6(3) |
| F(4')-C(1')-F(5')  | 107.4(3) |
| F(4')-C(1')-C(2')  | 111.1(3) |
| F(6')-C(1')-F(4')  | 108.1(3) |
| F(6')-C(1')-F(5')  | 107.7(3) |
| F(6')-C(1')-C(2')  | 110.2(3) |
| F(5')-C(1')-C(2')  | 112.2(3) |
| O(1)-C(2)-C(3)     | 105.1(3) |
| O(1)-C(2)-C(4)     | 115.3(3) |
| O(1)-C(2)-C(1)     | 105.2(2) |
| C(3)-C(2)-C(1)     | 109.9(3) |
| C(4)-C(2)-C(3)     | 108.4(2) |
| C(4)-C(2)-C(1)     | 112.6(3) |



|                |          |
|----------------|----------|
| F(4)-C(1)-C(2) | 113.8(3) |
| F(6)-C(1)-F(4) | 107.9(3) |
| F(6)-C(1)-C(2) | 110.3(3) |
| F(5)-C(1)-F(4) | 106.1(3) |
| F(5)-C(1)-F(6) | 107.4(3) |
| F(5)-C(1)-C(2) | 110.9(3) |
| C(8)-C(7)-H(7) | 120.3    |
| C(6)-C(7)-C(8) | 119.4(3) |
| C(6)-C(7)-H(7) | 120.3    |

---

Symmetry transformations used to generate equivalent atoms:

Table 4. Anisotropic displacement parameters ( $\text{\AA}^2 \times 10^3$ ) for cain80\_0m\_a (“**HALF**”). The anisotropic displacement factor exponent takes the form:  $-2\pi^2 [ h^2 a^{*2} U^{11} + \dots + 2 h k a^* b^* U^{12} ]$

|        | U <sup>11</sup> | U <sup>22</sup> | U <sup>33</sup> | U <sup>23</sup> | U <sup>13</sup> | U <sup>12</sup> |
|--------|-----------------|-----------------|-----------------|-----------------|-----------------|-----------------|
| Br(1') | 18(1)           | 13(1)           | 10(1)           | 1(1)            | 1(1)            | -2(1)           |
| Br(1)  | 17(1)           | 17(1)           | 9(1)            | -1(1)           | 2(1)            | -5(1)           |
| F(1)   | 17(1)           | 17(1)           | 23(1)           | 3(1)            | 2(1)            | 5(1)            |
| F(4')  | 22(1)           | 28(1)           | 20(1)           | 4(1)            | 3(1)            | 15(1)           |
| F(2')  | 17(1)           | 30(1)           | 18(1)           | -1(1)           | -4(1)           | -1(1)           |
| F(4)   | 27(1)           | 23(1)           | 18(1)           | -9(1)           | 4(1)            | -7(1)           |
| F(6')  | 22(1)           | 31(1)           | 17(1)           | -5(1)           | 3(1)            | 14(1)           |
| O(1')  | 12(1)           | 15(1)           | 16(1)           | 5(1)            | 4(1)            | 1(1)            |
| F(6)   | 14(1)           | 22(1)           | 25(1)           | -1(1)           | -4(1)           | 2(1)            |
| F(3)   | 28(1)           | 10(1)           | 34(1)           | 2(1)            | 11(1)           | 0(1)            |
| O(1)   | 16(1)           | 13(1)           | 14(1)           | -1(1)           | 6(1)            | -1(1)           |
| F(1')  | 23(1)           | 17(1)           | 26(1)           | -9(1)           | 3(1)            | 1(1)            |
| O(3)   | 18(1)           | 13(1)           | 28(1)           | -6(1)           | 3(1)            | 2(1)            |
| F(2)   | 30(1)           | 19(1)           | 23(1)           | 1(1)            | 14(1)           | 11(1)           |
| O(3')  | 12(1)           | 18(1)           | 23(1)           | -3(1)           | 2(1)            | 4(1)            |
| F(3')  | 27(1)           | 28(1)           | 27(1)           | 3(1)            | -1(1)           | -17(1)          |
| F(5)   | 22(1)           | 25(1)           | 25(1)           | -2(1)           | 4(1)            | -12(1)          |
| O(2)   | 10(1)           | 14(1)           | 23(1)           | -6(1)           | -1(1)           | 2(1)            |
| O(2')  | 13(1)           | 11(1)           | 21(1)           | -6(1)           | 2(1)            | 1(1)            |
| F(5')  | 15(1)           | 40(2)           | 45(1)           | 6(1)            | 16(1)           | 2(1)            |
| C(10)  | 12(1)           | 12(2)           | 14(2)           | -2(1)           | 5(1)            | -2(1)           |
| C(11') | 16(2)           | 16(2)           | 23(2)           | -7(1)           | 1(1)            | -3(1)           |
| C(11)  | 14(2)           | 21(2)           | 22(2)           | -5(2)           | -1(1)           | -4(1)           |
| C(10') | 15(2)           | 11(2)           | 11(1)           | 1(1)            | 3(1)            | 1(1)            |
| C(5')  | 14(2)           | 11(2)           | 7(1)            | -1(1)           | 2(1)            | 3(1)            |
| C(9)   | 13(2)           | 13(2)           | 13(2)           | -1(1)           | 1(1)            | 3(1)            |
| C(8)   | 15(2)           | 20(2)           | 9(2)            | 4(1)            | 2(1)            | 2(1)            |
| C(3)   | 22(2)           | 12(2)           | 15(2)           | 1(1)            | 8(1)            | 2(1)            |
| C(4')  | 10(1)           | 7(2)            | 14(2)           | 0(1)            | 4(1)            | 3(1)            |
| C(5)   | 9(1)            | 11(2)           | 9(1)            | 1(1)            | 1(1)            | 5(1)            |
| C(4)   | 9(1)            | 10(2)           | 13(2)           | -1(1)           | 1(1)            | 2(1)            |

|       |       |       |       |       |      |       |
|-------|-------|-------|-------|-------|------|-------|
| C(6)  | 7(1)  | 12(2) | 16(2) | -2(1) | 2(1) | 3(1)  |
| C(9') | 16(2) | 12(2) | 14(2) | 0(1)  | 3(1) | 3(1)  |
| C(2') | 9(1)  | 12(2) | 16(2) | 1(1)  | 3(1) | -1(1) |
| C(7') | 17(2) | 12(2) | 16(2) | 0(1)  | 7(1) | -1(1) |
| C(6') | 10(1) | 9(2)  | 16(2) | -3(1) | 3(1) | 2(1)  |
| C(8') | 22(2) | 14(2) | 13(2) | -1(1) | 6(1) | -1(1) |
| C(3') | 18(2) | 16(2) | 17(2) | 2(1)  | 0(1) | -4(1) |
| C(1') | 14(2) | 20(2) | 18(2) | 1(1)  | 3(1) | 5(1)  |
| C(2)  | 12(1) | 10(2) | 13(2) | -1(1) | 3(1) | 0(1)  |
| C(1)  | 17(2) | 16(2) | 16(2) | -2(1) | 4(1) | -1(1) |
| C(7)  | 12(2) | 14(2) | 16(2) | 2(1)  | 4(1) | 1(1)  |

---

Table 5. Hydrogen coordinates ( $\times 10^4$ ) and isotropic displacement parameters ( $\text{\AA}^2 \times 10^{-3}$ ) for cain80\_0m\_a (“HALF”).

|        | x        | y       | z        | U(eq)  |
|--------|----------|---------|----------|--------|
| H(1')  | 4705     | 4050    | 5694     | 21     |
| H(11A) | 7985     | 8249    | 6617     | 28     |
| H(11B) | 7775     | 7598    | 7552     | 28     |
| H(11C) | 7243     | 8582    | 7348     | 28     |
| H(11D) | 7844     | 3594    | 6436     | 29     |
| H(11E) | 8302     | 2690    | 7055     | 29     |
| H(11F) | 7347     | 3161    | 7346     | 29     |
| H(9)   | 4301     | 465     | 2865     | 16     |
| H(8)   | 5132     | 1713    | 2317     | 18     |
| H(9')  | 4008     | 5563    | 3059     | 17     |
| H(7')  | 6381     | 7209    | 3761     | 18     |
| H(8')  | 5078     | 6622    | 2527     | 19     |
| H(7)   | 5953     | 2764    | 3552     | 17     |
| H(1)   | 3450(30) | 460(30) | 5680(30) | 12(11) |

## X-RAY OF 2

Table 1. Crystal data and structure refinement for cain84\_0m\_a (2).

|                                   |                                                                  |                  |
|-----------------------------------|------------------------------------------------------------------|------------------|
| Identification code               | B31Cs                                                            |                  |
| Empirical formula                 | C <sub>14</sub> H <sub>9</sub> Br F <sub>12</sub> O <sub>2</sub> |                  |
| Formula weight                    | 517.12                                                           |                  |
| Temperature                       | 100.0 K                                                          |                  |
| Wavelength                        | 0.71073 Å                                                        |                  |
| Crystal system                    | Monoclinic                                                       |                  |
| Space group                       | P 2 <sub>1</sub> /n                                              |                  |
| Unit cell dimensions              | a = 11.9324(10) Å                                                | α = 90°.         |
|                                   | b = 12.4694(12) Å                                                | β = 116.905(4)°. |
|                                   | c = 12.4948(10) Å                                                | γ = 90°.         |
| Volume                            | 1657.9(3) Å <sup>3</sup>                                         |                  |
| Z                                 | 4                                                                |                  |
| Density (calculated)              | 2.072 Mg/m <sup>3</sup>                                          |                  |
| Absorption coefficient            | 2.618 mm <sup>-1</sup>                                           |                  |
| F(000)                            | 1008                                                             |                  |
| Crystal size                      | 0.33 x 0.32 x 0.25 mm <sup>3</sup>                               |                  |
| Theta range for data collection   | 1.959 to 26.386°.                                                |                  |
| Index ranges                      | -14 ≤ h ≤ 14, -13 ≤ k ≤ 15, -15 ≤ l ≤ 11                         |                  |
| Reflections collected             | 8685                                                             |                  |
| Independent reflections           | 3370 [R(int) = 0.0365]                                           |                  |
| Completeness to theta = 25.242°   | 99.7 %                                                           |                  |
| Absorption correction             | Semi-empirical from equivalents                                  |                  |
| Max. and min. transmission        | 0.7454 and 0.6400                                                |                  |
| Refinement method                 | Full-matrix least-squares on F <sup>2</sup>                      |                  |
| Data / restraints / parameters    | 3370 / 0 / 264                                                   |                  |
| Goodness-of-fit on F <sup>2</sup> | 1.075                                                            |                  |
| Final R indices [I > 2σ(I)]       | R1 = 0.0464, wR2 = 0.1265                                        |                  |
| R indices (all data)              | R1 = 0.0573, wR2 = 0.1341                                        |                  |
| Extinction coefficient            | n/a                                                              |                  |
| Largest diff. peak and hole       | 1.690 and -0.525 e.Å <sup>-3</sup>                               |                  |

Table 2. Atomic coordinates ( $\times 10^4$ ) and equivalent isotropic displacement parameters ( $\text{\AA}^2 \times 10^3$ ) for cain84\_0m\_a (2).  $U(\text{eq})$  is defined as one third of the trace of the orthogonalized  $U^{ij}$  tensor.

|       | x       | y       | z       | $U(\text{eq})$ |
|-------|---------|---------|---------|----------------|
| Br(1) | 5171(1) | 2633(1) | 2871(1) | 17(1)          |
| F(12) | 8013(2) | 3404(2) | 4264(2) | 24(1)          |
| F(11) | 9253(2) | 3791(2) | 3493(2) | 25(1)          |
| F(8)  | 8153(2) | 5668(2) | 1954(3) | 27(1)          |
| F(7)  | 6437(2) | 5126(2) | 449(2)  | 22(1)          |
| F(10) | 8458(2) | 5052(2) | 4111(2) | 25(1)          |
| F(9)  | 8120(2) | 4180(2) | 1070(2) | 26(1)          |
| O(2)  | 6912(3) | 3082(2) | 1916(2) | 14(1)          |
| F(5)  | 1598(3) | 5632(2) | 2774(3) | 36(1)          |
| F(1)  | 4091(3) | 3270(2) | 4573(2) | 32(1)          |
| O(1)  | 2554(3) | 3103(3) | 2224(3) | 21(1)          |
| F(3)  | 3582(3) | 4911(2) | 4645(3) | 33(1)          |
| F(6)  | 636(3)  | 4208(3) | 1895(3) | 39(1)          |
| F(4)  | 1446(3) | 5233(2) | 1045(3) | 36(1)          |
| F(2)  | 2202(3) | 3658(3) | 4177(3) | 37(1)          |
| C(1)  | 5002(3) | 4135(3) | 2566(3) | 10(1)          |
| C(6)  | 5938(3) | 4689(3) | 2399(3) | 9(1)           |
| C(4)  | 4934(4) | 6364(3) | 2454(4) | 15(1)          |
| C(10) | 2187(4) | 2988(4) | 949(4)  | 20(1)          |
| C(5)  | 5899(4) | 5808(3) | 2377(4) | 13(1)          |
| C(2)  | 3971(4) | 4685(3) | 2578(3) | 11(1)          |
| C(12) | 8208(4) | 4099(3) | 3547(4) | 17(1)          |
| C(3)  | 3967(4) | 5803(3) | 2528(4) | 13(1)          |
| C(13) | 7449(4) | 4792(3) | 1437(4) | 18(1)          |
| C(11) | 7061(3) | 4152(3) | 2295(3) | 10(1)          |
| C(14) | 5956(4) | 2851(4) | 723(4)  | 21(1)          |
| C(7)  | 2861(4) | 4132(3) | 2683(4) | 13(1)          |
| C(8)  | 1632(4) | 4819(4) | 2112(5) | 27(1)          |
| C(9)  | 3192(4) | 3993(4) | 4042(4) | 25(1)          |

Table 3. Bond lengths [ $\text{\AA}$ ] and angles [ $^\circ$ ] for cain84\_0m\_a (2).

---

|              |          |
|--------------|----------|
| Br(1)-C(1)   | 1.905(4) |
| F(12)-C(12)  | 1.340(5) |
| F(11)-C(12)  | 1.336(5) |
| F(8)-C(13)   | 1.351(5) |
| F(7)-C(13)   | 1.344(5) |
| F(10)-C(12)  | 1.345(5) |
| F(9)-C(13)   | 1.328(5) |
| O(2)-C(11)   | 1.400(5) |
| O(2)-C(14)   | 1.438(5) |
| F(5)-C(8)    | 1.320(6) |
| F(1)-C(9)    | 1.326(6) |
| O(1)-C(10)   | 1.455(5) |
| O(1)-C(7)    | 1.386(5) |
| F(3)-C(9)    | 1.333(5) |
| F(6)-C(8)    | 1.332(5) |
| F(4)-C(8)    | 1.351(6) |
| F(2)-C(9)    | 1.334(5) |
| C(1)-C(6)    | 1.408(5) |
| C(1)-C(2)    | 1.414(5) |
| C(6)-C(5)    | 1.396(5) |
| C(6)-C(11)   | 1.554(5) |
| C(4)-H(4)    | 0.9500   |
| C(4)-C(5)    | 1.384(6) |
| C(4)-C(3)    | 1.388(6) |
| C(10)-H(10A) | 0.9800   |
| C(10)-H(10B) | 0.9800   |
| C(10)-H(10C) | 0.9800   |
| C(5)-H(5)    | 0.9500   |
| C(2)-C(3)    | 1.395(5) |
| C(2)-C(7)    | 1.552(5) |
| C(12)-C(11)  | 1.545(5) |
| C(3)-H(3)    | 0.9500   |
| C(13)-C(11)  | 1.566(5) |
| C(14)-H(14A) | 0.9800   |

|                     |          |
|---------------------|----------|
| C(14)-H(14B)        | 0.9800   |
| C(14)-H(14C)        | 0.9800   |
| C(7)-C(8)           | 1.564(6) |
| C(7)-C(9)           | 1.569(6) |
| C(11)-O(2)-C(14)    | 117.5(3) |
| C(7)-O(1)-C(10)     | 115.9(3) |
| C(6)-C(1)-Br(1)     | 119.5(3) |
| C(6)-C(1)-C(2)      | 121.1(4) |
| C(2)-C(1)-Br(1)     | 119.3(3) |
| C(1)-C(6)-C(11)     | 124.9(3) |
| C(5)-C(6)-C(1)      | 118.1(3) |
| C(5)-C(6)-C(11)     | 116.8(3) |
| C(5)-C(4)-H(4)      | 120.1    |
| C(5)-C(4)-C(3)      | 119.7(4) |
| C(3)-C(4)-H(4)      | 120.1    |
| O(1)-C(10)-H(10A)   | 109.5    |
| O(1)-C(10)-H(10B)   | 109.5    |
| O(1)-C(10)-H(10C)   | 109.5    |
| H(10A)-C(10)-H(10B) | 109.5    |
| H(10A)-C(10)-H(10C) | 109.5    |
| H(10B)-C(10)-H(10C) | 109.5    |
| C(6)-C(5)-H(5)      | 119.3    |
| C(4)-C(5)-C(6)      | 121.4(4) |
| C(4)-C(5)-H(5)      | 119.3    |
| C(1)-C(2)-C(7)      | 124.4(3) |
| C(3)-C(2)-C(1)      | 118.0(4) |
| C(3)-C(2)-C(7)      | 117.5(3) |
| F(12)-C(12)-F(10)   | 106.6(3) |
| F(12)-C(12)-C(11)   | 111.3(3) |
| F(11)-C(12)-F(12)   | 107.3(3) |
| F(11)-C(12)-F(10)   | 106.8(3) |
| F(11)-C(12)-C(11)   | 112.4(3) |
| F(10)-C(12)-C(11)   | 112.2(3) |
| C(4)-C(3)-C(2)      | 121.3(4) |
| C(4)-C(3)-H(3)      | 119.3    |



|                     |          |
|---------------------|----------|
| C(2)-C(3)-H(3)      | 119.3    |
| F(8)-C(13)-C(11)    | 113.4(3) |
| F(7)-C(13)-F(8)     | 107.1(3) |
| F(7)-C(13)-C(11)    | 111.4(3) |
| F(9)-C(13)-F(8)     | 106.7(3) |
| F(9)-C(13)-F(7)     | 107.0(3) |
| F(9)-C(13)-C(11)    | 110.8(3) |
| O(2)-C(11)-C(6)     | 117.2(3) |
| O(2)-C(11)-C(12)    | 102.7(3) |
| O(2)-C(11)-C(13)    | 106.5(3) |
| C(6)-C(11)-C(13)    | 111.8(3) |
| C(12)-C(11)-C(6)    | 109.7(3) |
| C(12)-C(11)-C(13)   | 108.3(3) |
| O(2)-C(14)-H(14A)   | 109.5    |
| O(2)-C(14)-H(14B)   | 109.5    |
| O(2)-C(14)-H(14C)   | 109.5    |
| H(14A)-C(14)-H(14B) | 109.5    |
| H(14A)-C(14)-H(14C) | 109.5    |
| H(14B)-C(14)-H(14C) | 109.5    |
| O(1)-C(7)-C(2)      | 116.9(3) |
| O(1)-C(7)-C(8)      | 107.5(3) |
| O(1)-C(7)-C(9)      | 103.7(3) |
| C(2)-C(7)-C(8)      | 112.2(3) |
| C(2)-C(7)-C(9)      | 109.5(3) |
| C(8)-C(7)-C(9)      | 106.3(3) |
| F(5)-C(8)-F(6)      | 106.8(4) |
| F(5)-C(8)-F(4)      | 106.7(4) |
| F(5)-C(8)-C(7)      | 115.0(4) |
| F(6)-C(8)-F(4)      | 106.5(4) |
| F(6)-C(8)-C(7)      | 110.2(4) |
| F(4)-C(8)-C(7)      | 111.2(4) |
| F(1)-C(9)-F(3)      | 107.8(4) |
| F(1)-C(9)-F(2)      | 106.6(4) |
| F(1)-C(9)-C(7)      | 111.5(4) |
| F(3)-C(9)-F(2)      | 107.5(4) |
| F(3)-C(9)-C(7)      | 111.6(4) |

F(2)-C(9)-C(7)

111.5(4)

---

Symmetry transformations used to generate equivalent atoms:

Table 4. Anisotropic displacement parameters ( $\text{\AA}^2 \times 10^3$ ) for cain84\_0m\_a (2). The anisotropic displacement factor exponent takes the form:  $-2\pi^2 [ h^2 a^{*2} U^{11} + \dots + 2 h k a^* b^* U^{12} ]$

|       | U <sup>11</sup> | U <sup>22</sup> | U <sup>33</sup> | U <sup>23</sup> | U <sup>13</sup> | U <sup>12</sup> |
|-------|-----------------|-----------------|-----------------|-----------------|-----------------|-----------------|
| Br(1) | 16(1)           | 9(1)            | 29(1)           | 5(1)            | 13(1)           | 2(1)            |
| F(12) | 20(1)           | 31(2)           | 15(1)           | 8(1)            | 3(1)            | 0(1)            |
| F(11) | 10(1)           | 39(2)           | 23(1)           | 0(1)            | 5(1)            | 4(1)            |
| F(8)  | 22(1)           | 24(1)           | 40(2)           | 1(1)            | 18(1)           | -10(1)          |
| F(7)  | 24(1)           | 28(1)           | 16(1)           | 8(1)            | 11(1)           | 5(1)            |
| F(10) | 18(1)           | 25(1)           | 22(1)           | -9(1)           | 0(1)            | -4(1)           |
| F(9)  | 22(1)           | 36(2)           | 30(2)           | 5(1)            | 20(1)           | 6(1)            |
| O(2)  | 14(1)           | 13(1)           | 12(1)           | -1(1)           | 3(1)            | 1(1)            |
| F(5)  | 31(2)           | 24(2)           | 66(2)           | -2(1)           | 32(2)           | 8(1)            |
| F(1)  | 44(2)           | 36(2)           | 16(1)           | 9(1)            | 12(1)           | 11(1)           |
| O(1)  | 22(2)           | 21(2)           | 20(2)           | -4(1)           | 9(1)            | -5(1)           |
| F(3)  | 47(2)           | 32(2)           | 28(2)           | -14(1)          | 25(2)           | -14(1)          |
| F(6)  | 18(1)           | 41(2)           | 56(2)           | 1(2)            | 16(1)           | -1(1)           |
| F(4)  | 23(2)           | 39(2)           | 36(2)           | 15(1)           | 5(1)            | 5(1)            |
| F(2)  | 43(2)           | 45(2)           | 38(2)           | -6(2)           | 31(2)           | -15(2)          |
| C(1)  | 9(2)            | 9(2)            | 7(2)            | -1(1)           | 1(2)            | 0(1)            |
| C(6)  | 9(2)            | 9(2)            | 6(2)            | 0(1)            | 1(2)            | 0(1)            |
| C(4)  | 24(2)           | 8(2)            | 15(2)           | 1(2)            | 10(2)           | 1(2)            |
| C(10) | 27(2)           | 20(2)           | 9(2)            | -4(2)           | 5(2)            | -6(2)           |
| C(5)  | 17(2)           | 13(2)           | 11(2)           | 1(2)            | 7(2)            | -3(2)           |
| C(2)  | 10(2)           | 14(2)           | 7(2)            | -1(2)           | 4(2)            | 0(2)            |
| C(12) | 12(2)           | 19(2)           | 18(2)           | -2(2)           | 5(2)            | -1(2)           |
| C(3)  | 18(2)           | 9(2)            | 13(2)           | 0(2)            | 8(2)            | 6(2)            |
| C(13) | 17(2)           | 19(2)           | 20(2)           | 1(2)            | 11(2)           | -1(2)           |
| C(11) | 8(2)            | 12(2)           | 8(2)            | 2(2)            | 3(2)            | 1(1)            |
| C(14) | 18(2)           | 21(2)           | 15(2)           | -7(2)           | 1(2)            | 1(2)            |
| C(7)  | 10(2)           | 12(2)           | 18(2)           | 0(2)            | 8(2)            | 1(2)            |
| C(8)  | 19(2)           | 27(3)           | 35(3)           | 3(2)            | 13(2)           | 1(2)            |
| C(9)  | 25(2)           | 30(2)           | 24(2)           | -3(2)           | 14(2)           | -3(2)           |

Table 5. Hydrogen coordinates ( $\times 10^4$ ) and isotropic displacement parameters ( $\text{\AA}^2 \times 10^{-3}$ ) for cain84\_0m\_a (2).

|        | x    | y    | z    | U(eq) |
|--------|------|------|------|-------|
| H(4)   | 4934 | 7126 | 2456 | 18    |
| H(10A) | 1349 | 3296 | 482  | 30    |
| H(10B) | 2172 | 2225 | 752  | 30    |
| H(10C) | 2793 | 3364 | 755  | 30    |
| H(5)   | 6548 | 6196 | 2307 | 16    |
| H(3)   | 3288 | 6188 | 2544 | 16    |
| H(14A) | 6270 | 3022 | 142  | 31    |
| H(14B) | 5208 | 3284 | 552  | 31    |
| H(14C) | 5737 | 2088 | 664  | 31    |

## X-RAY OF 3

Table 1. Crystal data and structure refinement for Cain58 (3).

|                                   |                                             |                                |
|-----------------------------------|---------------------------------------------|--------------------------------|
| Identification code               | JH167                                       |                                |
| Empirical formula                 | C78 H87 O6 P3                               |                                |
| Formula weight                    | 1213.38                                     |                                |
| Temperature                       | 100.0 K                                     |                                |
| Wavelength                        | 0.71073 Å                                   |                                |
| Crystal system                    | Triclinic                                   |                                |
| Space group                       | P-1                                         |                                |
| Unit cell dimensions              | a = 10.515(5) Å                             | $\alpha = 100.80(3)^\circ$ .   |
|                                   | b = 15.037(8) Å                             | $\beta = 94.78(2)^\circ$ .     |
|                                   | c = 22.719(11) Å                            | $\gamma = 103.351(19)^\circ$ . |
| Volume                            | 3403(3) Å <sup>3</sup>                      |                                |
| Z                                 | 2                                           |                                |
| Density (calculated)              | 1.184 Mg/m <sup>3</sup>                     |                                |
| Absorption coefficient            | 0.140 mm <sup>-1</sup>                      |                                |
| F(000)                            | 1296                                        |                                |
| Crystal size                      | 0.28 x 0.08 x 0.04 mm <sup>3</sup>          |                                |
| Theta range for data collection   | 1.425 to 23.409°.                           |                                |
| Index ranges                      | -11<=h<=11, -16<=k<=16, -25<=l<=25          |                                |
| Reflections collected             | 45744                                       |                                |
| Independent reflections           | 9821 [R(int) = 0.0824]                      |                                |
| Completeness to theta = 23.409°   | 99.0 %                                      |                                |
| Absorption correction             | Semi-empirical from equivalents             |                                |
| Max. and min. transmission        | 0.2571 and 0.2038                           |                                |
| Refinement method                 | Full-matrix least-squares on F <sup>2</sup> |                                |
| Data / restraints / parameters    | 9821 / 0 / 803                              |                                |
| Goodness-of-fit on F <sup>2</sup> | 1.096                                       |                                |
| Final R indices [I>2sigma(I)]     | R1 = 0.0788, wR2 = 0.1660                   |                                |
| R indices (all data)              | R1 = 0.1154, wR2 = 0.1799                   |                                |
| Extinction coefficient            | n/a                                         |                                |
| Largest diff. peak and hole       | 0.408 and -0.375 e.Å <sup>-3</sup>          |                                |

Table 2. Atomic coordinates ( $\times 10^4$ ) and equivalent isotropic displacement parameters ( $\text{\AA}^2 \times 10^3$ ) for Cain58 (3).  $U(\text{eq})$  is defined as one third of the trace of the orthogonalized  $U^{ij}$  tensor.

|       | x        | y        | z       | $U(\text{eq})$ |
|-------|----------|----------|---------|----------------|
| P(2)  | 2753(1)  | 7331(1)  | 7046(1) | 23(1)          |
| P(3)  | 1107(1)  | 6059(1)  | 6916(1) | 23(1)          |
| P(1)  | 2046(1)  | 6854(1)  | 7843(1) | 23(1)          |
| O(6)  | -511(3)  | 3706(2)  | 7037(2) | 24(1)          |
| O(2)  | 5561(3)  | 7449(2)  | 7824(2) | 25(1)          |
| O(1)  | 898(3)   | 5570(2)  | 9336(2) | 27(1)          |
| O(4)  | 1390(3)  | 7449(3)  | 5688(2) | 33(1)          |
| O(3)  | 4426(3)  | 10065(2) | 8127(2) | 34(1)          |
| O(5)  | 3542(3)  | 5448(3)  | 5367(2) | 32(1)          |
| C(6)  | 2497(5)  | 5803(4)  | 8649(2) | 24(1)          |
| C(75) | -2555(5) | 3940(4)  | 7362(2) | 24(1)          |
| C(58) | 1750(5)  | 4409(4)  | 7056(2) | 23(1)          |
| C(57) | 2456(5)  | 3728(4)  | 6975(2) | 25(1)          |
| C(17) | 5027(5)  | 6476(4)  | 7585(2) | 24(1)          |
| C(3)  | 4848(5)  | 5459(4)  | 8333(2) | 26(1)          |
| C(28) | 942(5)   | 8331(4)  | 6632(2) | 29(1)          |
| C(1)  | 3045(4)  | 6163(3)  | 8166(2) | 19(1)          |
| C(2)  | 4265(5)  | 6012(3)  | 8025(2) | 22(1)          |
| C(53) | 2001(4)  | 5136(3)  | 6746(2) | 20(1)          |
| C(18) | 6811(4)  | 7648(3)  | 8159(2) | 21(1)          |
| C(27) | 1925(4)  | 8299(4)  | 7089(2) | 22(1)          |
| C(7)  | 1280(5)  | 6038(4)  | 8869(2) | 27(1)          |
| C(60) | 3811(5)  | 6111(4)  | 5010(2) | 26(1)          |
| C(23) | 7901(5)  | 7646(3)  | 7849(2) | 22(1)          |
| C(55) | 3564(5)  | 4428(4)  | 6238(2) | 28(1)          |
| C(59) | 3093(5)  | 5827(4)  | 5915(2) | 30(1)          |
| C(39) | 6619(5)  | 9907(4)  | 8017(2) | 28(1)          |
| C(20) | 8191(5)  | 8114(3)  | 9097(2) | 26(1)          |
| C(19) | 6942(5)  | 7892(3)  | 8783(2) | 26(1)          |
| C(70) | -1604(5) | 3427(4)  | 7332(2) | 25(1)          |
| C(65) | 5060(5)  | 6697(4)  | 5086(2) | 29(1)          |

|       |          |          |          |       |
|-------|----------|----------|----------|-------|
| C(22) | 9142(5)  | 7891(4)  | 8187(3)  | 30(1) |
| C(32) | 2440(5)  | 9083(4)  | 7557(2)  | 28(1) |
| C(54) | 2880(5)  | 5118(4)  | 6306(2)  | 25(1) |
| C(35) | 6034(5)  | 10509(4) | 8999(2)  | 32(1) |
| C(74) | -3683(5) | 3586(4)  | 7614(2)  | 29(1) |
| C(72) | -2897(5) | 2291(4)  | 7796(2)  | 32(1) |
| C(76) | -2388(5) | 4816(4)  | 7134(2)  | 30(1) |
| C(44) | 1583(5)  | 8097(4)  | 5317(2)  | 31(1) |
| C(71) | -1767(5) | 2599(4)  | 7538(2)  | 29(1) |
| C(34) | 5710(5)  | 10146(3) | 8389(2)  | 27(1) |
| C(38) | 7912(5)  | 10052(3) | 8288(3)  | 31(1) |
| C(69) | 643(5)   | 4260(4)  | 7437(2)  | 25(1) |
| C(33) | 3593(5)  | 9139(4)  | 8021(2)  | 29(1) |
| C(8)  | 154(5)   | 6008(4)  | 9724(2)  | 29(1) |
| C(21) | 9309(5)  | 8120(4)  | 8811(2)  | 30(1) |
| C(5)  | 3102(5)  | 5243(4)  | 8938(2)  | 31(1) |
| C(73) | -3870(5) | 2778(4)  | 7835(2)  | 28(1) |
| C(56) | 3381(5)  | 3748(4)  | 6576(2)  | 31(1) |
| C(61) | 2816(5)  | 6148(4)  | 4585(2)  | 34(1) |
| C(9)  | -1204(5) | 5853(4)  | 9544(3)  | 34(1) |
| C(49) | 2738(5)  | 8801(4)  | 5427(2)  | 32(1) |
| C(24) | 5755(5)  | 7929(4)  | 9116(2)  | 34(1) |
| C(64) | 5312(5)  | 7364(4)  | 4730(2)  | 33(1) |
| C(4)  | 4280(5)  | 5081(4)  | 8778(3)  | 33(1) |
| C(31) | 1936(5)  | 9864(4)  | 7601(3)  | 38(2) |
| C(37) | 8271(5)  | 10414(4) | 8905(3)  | 34(1) |
| C(45) | 634(5)   | 7981(5)  | 4822(3)  | 41(2) |
| C(26) | 7757(5)  | 7437(4)  | 7167(2)  | 34(1) |
| C(63) | 4327(6)  | 7431(4)  | 4305(2)  | 35(1) |
| C(13) | 788(6)   | 6547(4)  | 10271(2) | 33(1) |
| C(62) | 3089(6)  | 6820(4)  | 4239(2)  | 38(2) |
| C(36) | 7336(6)  | 10647(4) | 9252(3)  | 35(1) |
| C(43) | 410(5)   | 7563(4)  | 6086(2)  | 34(1) |
| C(29) | 479(5)   | 9137(4)  | 6693(3)  | 43(2) |
| C(48) | 2907(5)  | 9418(5)  | 5046(3)  | 42(2) |
| C(50) | 3800(5)  | 8880(4)  | 5938(2)  | 36(1) |

|       |          |          |          |        |
|-------|----------|----------|----------|--------|
| C(10) | -1902(6) | 6281(5)  | 9961(3)  | 48(2)  |
| C(40) | 6242(6)  | 9554(4)  | 7349(2)  | 39(2)  |
| C(25) | 10672(5) | 8394(4)  | 9172(3)  | 38(2)  |
| C(66) | 6150(5)  | 6626(5)  | 5536(3)  | 42(2)  |
| C(78) | -760(5)  | 2026(4)  | 7466(3)  | 39(2)  |
| C(16) | 2250(6)  | 6728(4)  | 10431(3) | 43(2)  |
| C(77) | -5102(5) | 2428(4)  | 8110(3)  | 43(2)  |
| C(11) | -1315(7) | 6814(4)  | 10516(3) | 44(2)  |
| C(68) | 1465(6)  | 5471(5)  | 4502(3)  | 51(2)  |
| C(41) | 9665(6)  | 10547(4) | 9186(3)  | 47(2)  |
| C(67) | 4589(7)  | 8155(4)  | 3920(3)  | 48(2)  |
| C(30) | 944(6)   | 9881(5)  | 7166(3)  | 47(2)  |
| C(12) | 39(7)    | 6950(4)  | 10670(3) | 47(2)  |
| C(47) | 1982(6)  | 9362(5)  | 4566(3)  | 55(2)  |
| C(14) | -1846(5) | 5290(5)  | 8933(3)  | 49(2)  |
| C(42) | 5015(6)  | 10786(5) | 9380(3)  | 52(2)  |
| C(46) | 867(6)   | 8643(5)  | 4462(3)  | 54(2)  |
| C(52) | -590(6)  | 7177(5)  | 4662(3)  | 54(2)  |
| C(15) | -2133(8) | 7242(5)  | 10962(4) | 74(2)  |
| C(51) | 2196(7)  | 10080(7) | 4175(4)  | 107(4) |

---



Table 3. Bond lengths [ $\text{\AA}$ ] and angles [ $^\circ$ ] for Cain58 (3).

---

|              |          |
|--------------|----------|
| P(2)-P(3)    | 2.217(2) |
| P(2)-P(1)    | 2.194(2) |
| P(2)-C(27)   | 1.853(5) |
| P(3)-P(1)    | 2.237(2) |
| P(3)-C(53)   | 1.850(5) |
| P(1)-C(1)    | 1.839(5) |
| O(6)-C(70)   | 1.399(6) |
| O(6)-C(69)   | 1.434(6) |
| O(2)-C(17)   | 1.422(6) |
| O(2)-C(18)   | 1.400(6) |
| O(1)-C(7)    | 1.415(6) |
| O(1)-C(8)    | 1.400(6) |
| O(4)-C(44)   | 1.395(6) |
| O(4)-C(43)   | 1.445(6) |
| O(3)-C(34)   | 1.398(6) |
| O(3)-C(33)   | 1.428(6) |
| O(5)-C(60)   | 1.393(6) |
| O(5)-C(59)   | 1.432(6) |
| C(6)-C(1)    | 1.420(7) |
| C(6)-C(7)    | 1.504(7) |
| C(6)-C(5)    | 1.388(7) |
| C(75)-C(70)  | 1.395(7) |
| C(75)-C(74)  | 1.398(7) |
| C(75)-C(76)  | 1.483(7) |
| C(58)-C(57)  | 1.392(7) |
| C(58)-C(53)  | 1.396(7) |
| C(58)-C(69)  | 1.508(7) |
| C(57)-H(57)  | 0.9500   |
| C(57)-C(56)  | 1.384(7) |
| C(17)-H(17A) | 0.9900   |
| C(17)-H(17B) | 0.9900   |
| C(17)-C(2)   | 1.505(7) |
| C(3)-H(3)    | 0.9500   |
| C(3)-C(2)    | 1.391(7) |

|              |          |
|--------------|----------|
| C(3)-C(4)    | 1.365(7) |
| C(28)-C(27)  | 1.418(7) |
| C(28)-C(43)  | 1.494(8) |
| C(28)-C(29)  | 1.395(8) |
| C(1)-C(2)    | 1.406(7) |
| C(53)-C(54)  | 1.417(7) |
| C(18)-C(23)  | 1.395(7) |
| C(18)-C(19)  | 1.385(7) |
| C(27)-C(32)  | 1.398(7) |
| C(7)-H(7A)   | 0.9900   |
| C(7)-H(7B)   | 0.9900   |
| C(60)-C(65)  | 1.379(7) |
| C(60)-C(61)  | 1.382(7) |
| C(23)-C(22)  | 1.391(7) |
| C(23)-C(26)  | 1.509(7) |
| C(55)-H(55)  | 0.9500   |
| C(55)-C(54)  | 1.386(7) |
| C(55)-C(56)  | 1.377(7) |
| C(59)-H(59A) | 0.9900   |
| C(59)-H(59B) | 0.9900   |
| C(59)-C(54)  | 1.502(7) |
| C(39)-C(34)  | 1.391(7) |
| C(39)-C(38)  | 1.397(7) |
| C(39)-C(40)  | 1.496(7) |
| C(20)-H(20)  | 0.9500   |
| C(20)-C(19)  | 1.378(7) |
| C(20)-C(21)  | 1.389(7) |
| C(19)-C(24)  | 1.518(7) |
| C(70)-C(71)  | 1.390(7) |
| C(65)-C(64)  | 1.397(7) |
| C(65)-C(66)  | 1.507(7) |
| C(22)-H(22)  | 0.9500   |
| C(22)-C(21)  | 1.380(7) |
| C(32)-C(33)  | 1.515(7) |
| C(32)-C(31)  | 1.387(7) |
| C(35)-C(34)  | 1.374(7) |

|              |          |
|--------------|----------|
| C(35)-C(36)  | 1.394(7) |
| C(35)-C(42)  | 1.515(8) |
| C(74)-H(74)  | 0.9500   |
| C(74)-C(73)  | 1.379(7) |
| C(72)-H(72)  | 0.9500   |
| C(72)-C(71)  | 1.390(7) |
| C(72)-C(73)  | 1.389(7) |
| C(76)-H(76A) | 0.9800   |
| C(76)-H(76B) | 0.9800   |
| C(76)-H(76C) | 0.9800   |
| C(44)-C(49)  | 1.384(7) |
| C(44)-C(45)  | 1.397(7) |
| C(71)-C(78)  | 1.513(7) |
| C(38)-H(38)  | 0.9500   |
| C(38)-C(37)  | 1.389(8) |
| C(69)-H(69A) | 0.9900   |
| C(69)-H(69B) | 0.9900   |
| C(33)-H(33A) | 0.9900   |
| C(33)-H(33B) | 0.9900   |
| C(8)-C(9)    | 1.404(7) |
| C(8)-C(13)   | 1.372(8) |
| C(21)-C(25)  | 1.517(7) |
| C(5)-H(5)    | 0.9500   |
| C(5)-C(4)    | 1.380(7) |
| C(73)-C(77)  | 1.513(7) |
| C(56)-H(56)  | 0.9500   |
| C(61)-C(62)  | 1.388(8) |
| C(61)-C(68)  | 1.519(8) |
| C(9)-C(10)   | 1.399(8) |
| C(9)-C(14)   | 1.496(8) |
| C(49)-C(48)  | 1.375(8) |
| C(49)-C(50)  | 1.509(7) |
| C(24)-H(24A) | 0.9800   |
| C(24)-H(24B) | 0.9800   |
| C(24)-H(24C) | 0.9800   |
| C(64)-H(64)  | 0.9500   |

|              |          |
|--------------|----------|
| C(64)-C(63)  | 1.390(8) |
| C(4)-H(4)    | 0.9500   |
| C(31)-H(31)  | 0.9500   |
| C(31)-C(30)  | 1.384(8) |
| C(37)-C(36)  | 1.376(8) |
| C(37)-C(41)  | 1.503(8) |
| C(45)-C(46)  | 1.395(8) |
| C(45)-C(52)  | 1.512(8) |
| C(26)-H(26A) | 0.9800   |
| C(26)-H(26B) | 0.9800   |
| C(26)-H(26C) | 0.9800   |
| C(63)-C(62)  | 1.387(8) |
| C(63)-C(67)  | 1.511(8) |
| C(13)-C(16)  | 1.499(8) |
| C(13)-C(12)  | 1.394(8) |
| C(62)-H(62)  | 0.9500   |
| C(36)-H(36)  | 0.9500   |
| C(43)-H(43A) | 0.9900   |
| C(43)-H(43B) | 0.9900   |
| C(29)-H(29)  | 0.9500   |
| C(29)-C(30)  | 1.361(9) |
| C(48)-H(48)  | 0.9500   |
| C(48)-C(47)  | 1.376(8) |
| C(50)-H(50A) | 0.9800   |
| C(50)-H(50B) | 0.9800   |
| C(50)-H(50C) | 0.9800   |
| C(10)-H(10)  | 0.9500   |
| C(10)-C(11)  | 1.371(9) |
| C(40)-H(40A) | 0.9800   |
| C(40)-H(40B) | 0.9800   |
| C(40)-H(40C) | 0.9800   |
| C(25)-H(25A) | 0.9800   |
| C(25)-H(25B) | 0.9800   |
| C(25)-H(25C) | 0.9800   |
| C(66)-H(66A) | 0.9800   |
| C(66)-H(66B) | 0.9800   |

|              |          |
|--------------|----------|
| C(66)-H(66C) | 0.9800   |
| C(78)-H(78A) | 0.9800   |
| C(78)-H(78B) | 0.9800   |
| C(78)-H(78C) | 0.9800   |
| C(16)-H(16A) | 0.9800   |
| C(16)-H(16B) | 0.9800   |
| C(16)-H(16C) | 0.9800   |
| C(77)-H(77A) | 0.9800   |
| C(77)-H(77B) | 0.9800   |
| C(77)-H(77C) | 0.9800   |
| C(11)-C(12)  | 1.396(9) |
| C(11)-C(15)  | 1.527(8) |
| C(68)-H(68A) | 0.9800   |
| C(68)-H(68B) | 0.9800   |
| C(68)-H(68C) | 0.9800   |
| C(41)-H(41A) | 0.9800   |
| C(41)-H(41B) | 0.9800   |
| C(41)-H(41C) | 0.9800   |
| C(67)-H(67A) | 0.9800   |
| C(67)-H(67B) | 0.9800   |
| C(67)-H(67C) | 0.9800   |
| C(30)-H(30)  | 0.9500   |
| C(12)-H(12)  | 0.9500   |
| C(47)-C(46)  | 1.368(9) |
| C(47)-C(51)  | 1.513(9) |
| C(14)-H(14A) | 0.9800   |
| C(14)-H(14B) | 0.9800   |
| C(14)-H(14C) | 0.9800   |
| C(42)-H(42A) | 0.9800   |
| C(42)-H(42B) | 0.9800   |
| C(42)-H(42C) | 0.9800   |
| C(46)-H(46)  | 0.9500   |
| C(52)-H(52A) | 0.9800   |
| C(52)-H(52B) | 0.9800   |
| C(52)-H(52C) | 0.9800   |
| C(15)-H(15A) | 0.9800   |

|                   |            |
|-------------------|------------|
| C(15)-H(15B)      | 0.9800     |
| C(15)-H(15C)      | 0.9800     |
| C(51)-H(51A)      | 0.9800     |
| C(51)-H(51B)      | 0.9800     |
| C(51)-H(51C)      | 0.9800     |
| P(1)-P(2)-P(3)    | 60.95(7)   |
| C(27)-P(2)-P(3)   | 104.08(16) |
| C(27)-P(2)-P(1)   | 96.46(16)  |
| P(2)-P(3)-P(1)    | 59.02(7)   |
| C(53)-P(3)-P(2)   | 100.54(17) |
| C(53)-P(3)-P(1)   | 103.76(16) |
| P(2)-P(1)-P(3)    | 60.03(7)   |
| C(1)-P(1)-P(2)    | 113.78(16) |
| C(1)-P(1)-P(3)    | 108.26(17) |
| C(70)-O(6)-C(69)  | 113.9(4)   |
| C(18)-O(2)-C(17)  | 112.8(4)   |
| C(8)-O(1)-C(7)    | 113.9(4)   |
| C(44)-O(4)-C(43)  | 113.6(4)   |
| C(34)-O(3)-C(33)  | 113.8(4)   |
| C(60)-O(5)-C(59)  | 110.9(4)   |
| C(1)-C(6)-C(7)    | 121.0(4)   |
| C(5)-C(6)-C(1)    | 120.1(5)   |
| C(5)-C(6)-C(7)    | 118.9(5)   |
| C(70)-C(75)-C(74) | 116.9(5)   |
| C(70)-C(75)-C(76) | 121.9(4)   |
| C(74)-C(75)-C(76) | 121.2(5)   |
| C(57)-C(58)-C(53) | 120.0(5)   |
| C(57)-C(58)-C(69) | 116.7(5)   |
| C(53)-C(58)-C(69) | 123.1(5)   |
| C(58)-C(57)-H(57) | 119.7      |
| C(56)-C(57)-C(58) | 120.6(5)   |
| C(56)-C(57)-H(57) | 119.7      |
| O(2)-C(17)-H(17A) | 109.4      |
| O(2)-C(17)-H(17B) | 109.4      |
| O(2)-C(17)-C(2)   | 111.3(4)   |

|                     |          |
|---------------------|----------|
| H(17A)-C(17)-H(17B) | 108.0    |
| C(2)-C(17)-H(17A)   | 109.4    |
| C(2)-C(17)-H(17B)   | 109.4    |
| C(2)-C(3)-H(3)      | 119.2    |
| C(4)-C(3)-H(3)      | 119.2    |
| C(4)-C(3)-C(2)      | 121.6(5) |
| C(27)-C(28)-C(43)   | 123.6(5) |
| C(29)-C(28)-C(27)   | 117.6(5) |
| C(29)-C(28)-C(43)   | 118.8(5) |
| C(6)-C(1)-P(1)      | 112.1(3) |
| C(2)-C(1)-P(1)      | 129.1(4) |
| C(2)-C(1)-C(6)      | 118.6(4) |
| C(3)-C(2)-C(17)     | 117.8(4) |
| C(3)-C(2)-C(1)      | 119.1(5) |
| C(1)-C(2)-C(17)     | 123.0(4) |
| C(58)-C(53)-P(3)    | 117.4(4) |
| C(58)-C(53)-C(54)   | 119.1(5) |
| C(54)-C(53)-P(3)    | 123.4(4) |
| C(23)-C(18)-O(2)    | 118.7(4) |
| C(19)-C(18)-O(2)    | 119.4(4) |
| C(19)-C(18)-C(23)   | 121.8(4) |
| C(28)-C(27)-P(2)    | 123.2(4) |
| C(32)-C(27)-P(2)    | 116.8(4) |
| C(32)-C(27)-C(28)   | 119.4(5) |
| O(1)-C(7)-C(6)      | 110.4(4) |
| O(1)-C(7)-H(7A)     | 109.6    |
| O(1)-C(7)-H(7B)     | 109.6    |
| C(6)-C(7)-H(7A)     | 109.6    |
| C(6)-C(7)-H(7B)     | 109.6    |
| H(7A)-C(7)-H(7B)    | 108.1    |
| C(65)-C(60)-O(5)    | 119.2(5) |
| C(65)-C(60)-C(61)   | 122.3(5) |
| C(61)-C(60)-O(5)    | 118.5(5) |
| C(18)-C(23)-C(26)   | 121.4(4) |
| C(22)-C(23)-C(18)   | 117.9(5) |
| C(22)-C(23)-C(26)   | 120.6(4) |

|                     |          |
|---------------------|----------|
| C(54)-C(55)-H(55)   | 119.2    |
| C(56)-C(55)-H(55)   | 119.2    |
| C(56)-C(55)-C(54)   | 121.6(5) |
| O(5)-C(59)-H(59A)   | 109.7    |
| O(5)-C(59)-H(59B)   | 109.7    |
| O(5)-C(59)-C(54)    | 109.8(4) |
| H(59A)-C(59)-H(59B) | 108.2    |
| C(54)-C(59)-H(59A)  | 109.7    |
| C(54)-C(59)-H(59B)  | 109.7    |
| C(34)-C(39)-C(38)   | 117.2(5) |
| C(34)-C(39)-C(40)   | 121.4(5) |
| C(38)-C(39)-C(40)   | 121.4(5) |
| C(19)-C(20)-H(20)   | 118.7    |
| C(19)-C(20)-C(21)   | 122.6(5) |
| C(21)-C(20)-H(20)   | 118.7    |
| C(18)-C(19)-C(24)   | 121.5(5) |
| C(20)-C(19)-C(18)   | 117.9(5) |
| C(20)-C(19)-C(24)   | 120.6(5) |
| C(75)-C(70)-O(6)    | 119.1(4) |
| C(71)-C(70)-O(6)    | 118.7(4) |
| C(71)-C(70)-C(75)   | 121.9(5) |
| C(60)-C(65)-C(64)   | 118.5(5) |
| C(60)-C(65)-C(66)   | 121.7(5) |
| C(64)-C(65)-C(66)   | 119.7(5) |
| C(23)-C(22)-H(22)   | 119.0    |
| C(21)-C(22)-C(23)   | 122.0(5) |
| C(21)-C(22)-H(22)   | 119.0    |
| C(27)-C(32)-C(33)   | 122.3(5) |
| C(31)-C(32)-C(27)   | 120.6(5) |
| C(31)-C(32)-C(33)   | 117.0(5) |
| C(53)-C(54)-C(59)   | 121.8(5) |
| C(55)-C(54)-C(53)   | 119.0(5) |
| C(55)-C(54)-C(59)   | 119.3(4) |
| C(34)-C(35)-C(36)   | 118.0(5) |
| C(34)-C(35)-C(42)   | 120.8(5) |
| C(36)-C(35)-C(42)   | 121.1(5) |



|                     |          |
|---------------------|----------|
| C(75)-C(74)-H(74)   | 118.5    |
| C(73)-C(74)-C(75)   | 123.0(5) |
| C(73)-C(74)-H(74)   | 118.5    |
| C(71)-C(72)-H(72)   | 119.3    |
| C(73)-C(72)-H(72)   | 119.3    |
| C(73)-C(72)-C(71)   | 121.4(5) |
| C(75)-C(76)-H(76A)  | 109.5    |
| C(75)-C(76)-H(76B)  | 109.5    |
| C(75)-C(76)-H(76C)  | 109.5    |
| H(76A)-C(76)-H(76B) | 109.5    |
| H(76A)-C(76)-H(76C) | 109.5    |
| H(76B)-C(76)-H(76C) | 109.5    |
| O(4)-C(44)-C(45)    | 118.7(5) |
| C(49)-C(44)-O(4)    | 119.3(4) |
| C(49)-C(44)-C(45)   | 121.9(5) |
| C(70)-C(71)-C(78)   | 120.9(5) |
| C(72)-C(71)-C(70)   | 118.7(5) |
| C(72)-C(71)-C(78)   | 120.4(5) |
| C(39)-C(34)-O(3)    | 118.8(5) |
| C(35)-C(34)-O(3)    | 118.1(5) |
| C(35)-C(34)-C(39)   | 123.0(5) |
| C(39)-C(38)-H(38)   | 119.4    |
| C(37)-C(38)-C(39)   | 121.3(5) |
| C(37)-C(38)-H(38)   | 119.4    |
| O(6)-C(69)-C(58)    | 106.8(4) |
| O(6)-C(69)-H(69A)   | 110.4    |
| O(6)-C(69)-H(69B)   | 110.4    |
| C(58)-C(69)-H(69A)  | 110.4    |
| C(58)-C(69)-H(69B)  | 110.4    |
| H(69A)-C(69)-H(69B) | 108.6    |
| O(3)-C(33)-C(32)    | 107.3(4) |
| O(3)-C(33)-H(33A)   | 110.2    |
| O(3)-C(33)-H(33B)   | 110.2    |
| C(32)-C(33)-H(33A)  | 110.2    |
| C(32)-C(33)-H(33B)  | 110.2    |
| H(33A)-C(33)-H(33B) | 108.5    |

|                     |          |
|---------------------|----------|
| O(1)-C(8)-C(9)      | 118.7(5) |
| C(13)-C(8)-O(1)     | 117.9(5) |
| C(13)-C(8)-C(9)     | 123.4(5) |
| C(20)-C(21)-C(25)   | 121.0(5) |
| C(22)-C(21)-C(20)   | 117.8(5) |
| C(22)-C(21)-C(25)   | 121.1(5) |
| C(6)-C(5)-H(5)      | 120.0    |
| C(4)-C(5)-C(6)      | 120.0(5) |
| C(4)-C(5)-H(5)      | 120.0    |
| C(74)-C(73)-C(72)   | 118.2(5) |
| C(74)-C(73)-C(77)   | 121.1(5) |
| C(72)-C(73)-C(77)   | 120.8(5) |
| C(57)-C(56)-H(56)   | 120.3    |
| C(55)-C(56)-C(57)   | 119.5(5) |
| C(55)-C(56)-H(56)   | 120.3    |
| C(60)-C(61)-C(62)   | 118.1(5) |
| C(60)-C(61)-C(68)   | 120.8(5) |
| C(62)-C(61)-C(68)   | 121.2(5) |
| C(8)-C(9)-C(14)     | 121.5(5) |
| C(10)-C(9)-C(8)     | 116.0(6) |
| C(10)-C(9)-C(14)    | 122.4(5) |
| C(44)-C(49)-C(50)   | 121.5(5) |
| C(48)-C(49)-C(44)   | 117.9(5) |
| C(48)-C(49)-C(50)   | 120.7(5) |
| C(19)-C(24)-H(24A)  | 109.5    |
| C(19)-C(24)-H(24B)  | 109.5    |
| C(19)-C(24)-H(24C)  | 109.5    |
| H(24A)-C(24)-H(24B) | 109.5    |
| H(24A)-C(24)-H(24C) | 109.5    |
| H(24B)-C(24)-H(24C) | 109.5    |
| C(65)-C(64)-H(64)   | 119.7    |
| C(63)-C(64)-C(65)   | 120.7(5) |
| C(63)-C(64)-H(64)   | 119.7    |
| C(3)-C(4)-C(5)      | 120.4(5) |
| C(3)-C(4)-H(4)      | 119.8    |
| C(5)-C(4)-H(4)      | 119.8    |

|                     |          |
|---------------------|----------|
| C(32)-C(31)-H(31)   | 120.1    |
| C(30)-C(31)-C(32)   | 119.7(6) |
| C(30)-C(31)-H(31)   | 120.1    |
| C(38)-C(37)-C(41)   | 120.1(5) |
| C(36)-C(37)-C(38)   | 119.2(5) |
| C(36)-C(37)-C(41)   | 120.6(5) |
| C(44)-C(45)-C(52)   | 123.2(6) |
| C(46)-C(45)-C(44)   | 116.8(6) |
| C(46)-C(45)-C(52)   | 120.0(5) |
| C(23)-C(26)-H(26A)  | 109.5    |
| C(23)-C(26)-H(26B)  | 109.5    |
| C(23)-C(26)-H(26C)  | 109.5    |
| H(26A)-C(26)-H(26B) | 109.5    |
| H(26A)-C(26)-H(26C) | 109.5    |
| H(26B)-C(26)-H(26C) | 109.5    |
| C(64)-C(63)-C(67)   | 121.0(5) |
| C(62)-C(63)-C(64)   | 118.8(5) |
| C(62)-C(63)-C(67)   | 120.1(5) |
| C(8)-C(13)-C(16)    | 121.4(5) |
| C(8)-C(13)-C(12)    | 118.1(6) |
| C(12)-C(13)-C(16)   | 120.5(5) |
| C(61)-C(62)-H(62)   | 119.2    |
| C(63)-C(62)-C(61)   | 121.6(5) |
| C(63)-C(62)-H(62)   | 119.2    |
| C(35)-C(36)-H(36)   | 119.4    |
| C(37)-C(36)-C(35)   | 121.3(5) |
| C(37)-C(36)-H(36)   | 119.4    |
| O(4)-C(43)-C(28)    | 112.5(4) |
| O(4)-C(43)-H(43A)   | 109.1    |
| O(4)-C(43)-H(43B)   | 109.1    |
| C(28)-C(43)-H(43A)  | 109.1    |
| C(28)-C(43)-H(43B)  | 109.1    |
| H(43A)-C(43)-H(43B) | 107.8    |
| C(28)-C(29)-H(29)   | 118.7    |
| C(30)-C(29)-C(28)   | 122.5(6) |
| C(30)-C(29)-H(29)   | 118.7    |

|                     |          |
|---------------------|----------|
| C(49)-C(48)-H(48)   | 118.6    |
| C(49)-C(48)-C(47)   | 122.8(6) |
| C(47)-C(48)-H(48)   | 118.6    |
| C(49)-C(50)-H(50A)  | 109.5    |
| C(49)-C(50)-H(50B)  | 109.5    |
| C(49)-C(50)-H(50C)  | 109.5    |
| H(50A)-C(50)-H(50B) | 109.5    |
| H(50A)-C(50)-H(50C) | 109.5    |
| H(50B)-C(50)-H(50C) | 109.5    |
| C(9)-C(10)-H(10)    | 118.6    |
| C(11)-C(10)-C(9)    | 122.7(6) |
| C(11)-C(10)-H(10)   | 118.6    |
| C(39)-C(40)-H(40A)  | 109.5    |
| C(39)-C(40)-H(40B)  | 109.5    |
| C(39)-C(40)-H(40C)  | 109.5    |
| H(40A)-C(40)-H(40B) | 109.5    |
| H(40A)-C(40)-H(40C) | 109.5    |
| H(40B)-C(40)-H(40C) | 109.5    |
| C(21)-C(25)-H(25A)  | 109.5    |
| C(21)-C(25)-H(25B)  | 109.5    |
| C(21)-C(25)-H(25C)  | 109.5    |
| H(25A)-C(25)-H(25B) | 109.5    |
| H(25A)-C(25)-H(25C) | 109.5    |
| H(25B)-C(25)-H(25C) | 109.5    |
| C(65)-C(66)-H(66A)  | 109.5    |
| C(65)-C(66)-H(66B)  | 109.5    |
| C(65)-C(66)-H(66C)  | 109.5    |
| H(66A)-C(66)-H(66B) | 109.5    |
| H(66A)-C(66)-H(66C) | 109.5    |
| H(66B)-C(66)-H(66C) | 109.5    |
| C(71)-C(78)-H(78A)  | 109.5    |
| C(71)-C(78)-H(78B)  | 109.5    |
| C(71)-C(78)-H(78C)  | 109.5    |
| H(78A)-C(78)-H(78B) | 109.5    |
| H(78A)-C(78)-H(78C) | 109.5    |
| H(78B)-C(78)-H(78C) | 109.5    |

|                     |          |
|---------------------|----------|
| C(13)-C(16)-H(16A)  | 109.5    |
| C(13)-C(16)-H(16B)  | 109.5    |
| C(13)-C(16)-H(16C)  | 109.5    |
| H(16A)-C(16)-H(16B) | 109.5    |
| H(16A)-C(16)-H(16C) | 109.5    |
| H(16B)-C(16)-H(16C) | 109.5    |
| C(73)-C(77)-H(77A)  | 109.5    |
| C(73)-C(77)-H(77B)  | 109.5    |
| C(73)-C(77)-H(77C)  | 109.5    |
| H(77A)-C(77)-H(77B) | 109.5    |
| H(77A)-C(77)-H(77C) | 109.5    |
| H(77B)-C(77)-H(77C) | 109.5    |
| C(10)-C(11)-C(12)   | 118.9(6) |
| C(10)-C(11)-C(15)   | 120.5(7) |
| C(12)-C(11)-C(15)   | 120.6(7) |
| C(61)-C(68)-H(68A)  | 109.5    |
| C(61)-C(68)-H(68B)  | 109.5    |
| C(61)-C(68)-H(68C)  | 109.5    |
| H(68A)-C(68)-H(68B) | 109.5    |
| H(68A)-C(68)-H(68C) | 109.5    |
| H(68B)-C(68)-H(68C) | 109.5    |
| C(37)-C(41)-H(41A)  | 109.5    |
| C(37)-C(41)-H(41B)  | 109.5    |
| C(37)-C(41)-H(41C)  | 109.5    |
| H(41A)-C(41)-H(41B) | 109.5    |
| H(41A)-C(41)-H(41C) | 109.5    |
| H(41B)-C(41)-H(41C) | 109.5    |
| C(63)-C(67)-H(67A)  | 109.5    |
| C(63)-C(67)-H(67B)  | 109.5    |
| C(63)-C(67)-H(67C)  | 109.5    |
| H(67A)-C(67)-H(67B) | 109.5    |
| H(67A)-C(67)-H(67C) | 109.5    |
| H(67B)-C(67)-H(67C) | 109.5    |
| C(31)-C(30)-H(30)   | 120.0    |
| C(29)-C(30)-C(31)   | 120.0(6) |
| C(29)-C(30)-H(30)   | 120.0    |

|                     |          |
|---------------------|----------|
| C(13)-C(12)-C(11)   | 121.0(6) |
| C(13)-C(12)-H(12)   | 119.5    |
| C(11)-C(12)-H(12)   | 119.5    |
| C(48)-C(47)-C(51)   | 120.7(6) |
| C(46)-C(47)-C(48)   | 117.7(6) |
| C(46)-C(47)-C(51)   | 121.6(6) |
| C(9)-C(14)-H(14A)   | 109.5    |
| C(9)-C(14)-H(14B)   | 109.5    |
| C(9)-C(14)-H(14C)   | 109.5    |
| H(14A)-C(14)-H(14B) | 109.5    |
| H(14A)-C(14)-H(14C) | 109.5    |
| H(14B)-C(14)-H(14C) | 109.5    |
| C(35)-C(42)-H(42A)  | 109.5    |
| C(35)-C(42)-H(42B)  | 109.5    |
| C(35)-C(42)-H(42C)  | 109.5    |
| H(42A)-C(42)-H(42B) | 109.5    |
| H(42A)-C(42)-H(42C) | 109.5    |
| H(42B)-C(42)-H(42C) | 109.5    |
| C(45)-C(46)-H(46)   | 118.6    |
| C(47)-C(46)-C(45)   | 122.8(5) |
| C(47)-C(46)-H(46)   | 118.6    |
| C(45)-C(52)-H(52A)  | 109.5    |
| C(45)-C(52)-H(52B)  | 109.5    |
| C(45)-C(52)-H(52C)  | 109.5    |
| H(52A)-C(52)-H(52B) | 109.5    |
| H(52A)-C(52)-H(52C) | 109.5    |
| H(52B)-C(52)-H(52C) | 109.5    |
| C(11)-C(15)-H(15A)  | 109.5    |
| C(11)-C(15)-H(15B)  | 109.5    |
| C(11)-C(15)-H(15C)  | 109.5    |
| H(15A)-C(15)-H(15B) | 109.5    |
| H(15A)-C(15)-H(15C) | 109.5    |
| H(15B)-C(15)-H(15C) | 109.5    |
| C(47)-C(51)-H(51A)  | 109.5    |
| C(47)-C(51)-H(51B)  | 109.5    |
| C(47)-C(51)-H(51C)  | 109.5    |

|                     |       |
|---------------------|-------|
| H(51A)-C(51)-H(51B) | 109.5 |
| H(51A)-C(51)-H(51C) | 109.5 |
| H(51B)-C(51)-H(51C) | 109.5 |

---

Symmetry transformations used to generate equivalent atoms:

Table 4. Anisotropic displacement parameters ( $\text{\AA}^2 \times 10^3$ ) for Cain58 (**3**). The anisotropic displacement factor exponent takes the form:  $-2\pi^2 [ h^2 a^{*2} U^{11} + \dots + 2 h k a^* b^* U^{12} ]$

|       | U <sup>11</sup> | U <sup>22</sup> | U <sup>33</sup> | U <sup>23</sup> | U <sup>13</sup> | U <sup>12</sup> |
|-------|-----------------|-----------------|-----------------|-----------------|-----------------|-----------------|
| P(2)  | 12(1)           | 32(1)           | 24(1)           | 7(1)            | 4(1)            | 6(1)            |
| P(3)  | 12(1)           | 32(1)           | 25(1)           | 7(1)            | 3(1)            | 4(1)            |
| P(1)  | 14(1)           | 32(1)           | 24(1)           | 7(1)            | 5(1)            | 8(1)            |
| O(6)  | 15(2)           | 33(2)           | 24(2)           | 6(2)            | 7(2)            | 4(2)            |
| O(2)  | 10(2)           | 33(2)           | 28(2)           | 4(2)            | 1(2)            | 4(2)            |
| O(1)  | 24(2)           | 35(2)           | 29(2)           | 16(2)           | 11(2)           | 12(2)           |
| O(4)  | 21(2)           | 40(2)           | 39(2)           | 14(2)           | -1(2)           | 6(2)            |
| O(3)  | 22(2)           | 23(2)           | 51(2)           | 8(2)            | -4(2)           | 0(2)            |
| O(5)  | 32(2)           | 39(2)           | 27(2)           | 6(2)            | 12(2)           | 10(2)           |
| C(6)  | 16(3)           | 28(3)           | 27(3)           | 6(2)            | 1(2)            | 5(2)            |
| C(75) | 20(3)           | 25(3)           | 26(3)           | 5(2)            | 2(2)            | 7(2)            |
| C(58) | 14(3)           | 31(3)           | 21(3)           | 4(2)            | -4(2)           | 2(2)            |
| C(57) | 20(3)           | 27(3)           | 27(3)           | 6(2)            | 0(2)            | 3(2)            |
| C(17) | 17(3)           | 33(3)           | 25(3)           | 4(2)            | 9(2)            | 9(2)            |
| C(3)  | 11(3)           | 28(3)           | 41(3)           | 7(3)            | 4(2)            | 6(2)            |
| C(28) | 13(3)           | 40(4)           | 38(3)           | 17(3)           | 10(2)           | 5(2)            |
| C(1)  | 15(3)           | 22(3)           | 19(3)           | 2(2)            | 1(2)            | 6(2)            |
| C(2)  | 14(3)           | 20(3)           | 29(3)           | 1(2)            | 2(2)            | 1(2)            |
| C(53) | 14(3)           | 25(3)           | 17(3)           | -1(2)           | -4(2)           | 2(2)            |
| C(18) | 14(3)           | 21(3)           | 26(3)           | 4(2)            | 2(2)            | 2(2)            |
| C(27) | 12(3)           | 27(3)           | 30(3)           | 11(3)           | 9(2)            | 4(2)            |
| C(7)  | 25(3)           | 38(3)           | 25(3)           | 14(3)           | 10(2)           | 12(3)           |
| C(60) | 28(3)           | 33(3)           | 18(3)           | 3(2)            | 7(2)            | 7(3)            |
| C(23) | 18(3)           | 24(3)           | 27(3)           | 5(2)            | 8(2)            | 10(2)           |
| C(55) | 19(3)           | 35(3)           | 26(3)           | 2(3)            | 4(2)            | 7(2)            |
| C(59) | 30(3)           | 42(4)           | 23(3)           | 8(3)            | 9(2)            | 14(3)           |
| C(39) | 29(3)           | 20(3)           | 34(3)           | 7(2)            | 4(3)            | 5(2)            |
| C(20) | 26(3)           | 19(3)           | 27(3)           | 2(2)            | -3(2)           | -2(2)           |
| C(19) | 23(3)           | 17(3)           | 37(3)           | 6(2)            | 9(2)            | 5(2)            |
| C(70) | 20(3)           | 32(3)           | 20(3)           | 1(2)            | 5(2)            | 6(2)            |
| C(65) | 24(3)           | 36(3)           | 25(3)           | 0(3)            | 7(2)            | 8(3)            |



|       |       |       |       |       |       |       |
|-------|-------|-------|-------|-------|-------|-------|
| C(22) | 14(3) | 29(3) | 45(4) | 1(3)  | 6(2)  | 4(2)  |
| C(32) | 19(3) | 31(3) | 38(3) | 14(3) | 9(2)  | 6(2)  |
| C(54) | 15(3) | 35(3) | 23(3) | 6(2)  | 1(2)  | 4(2)  |
| C(35) | 29(3) | 31(3) | 36(4) | 6(3)  | 5(3)  | 9(3)  |
| C(74) | 20(3) | 30(3) | 37(3) | 3(3)  | 6(2)  | 10(2) |
| C(72) | 29(3) | 27(3) | 41(3) | 11(3) | 12(3) | 7(3)  |
| C(76) | 23(3) | 32(3) | 40(3) | 10(3) | 8(3)  | 12(3) |
| C(44) | 20(3) | 46(4) | 30(3) | 12(3) | 1(2)  | 9(3)  |
| C(71) | 24(3) | 30(3) | 36(3) | 9(3)  | 11(2) | 12(2) |
| C(34) | 22(3) | 19(3) | 37(3) | 9(3)  | -3(3) | -1(2) |
| C(38) | 24(3) | 18(3) | 54(4) | 14(3) | 11(3) | 3(2)  |
| C(69) | 19(3) | 29(3) | 25(3) | 6(2)  | 1(2)  | 3(2)  |
| C(33) | 27(3) | 27(3) | 34(3) | 10(3) | 5(3)  | 5(3)  |
| C(8)  | 23(3) | 38(3) | 37(3) | 23(3) | 15(3) | 16(3) |
| C(21) | 24(3) | 25(3) | 35(3) | -3(3) | -3(3) | 8(2)  |
| C(5)  | 30(3) | 31(3) | 37(3) | 15(3) | 6(3)  | 10(3) |
| C(73) | 24(3) | 33(3) | 31(3) | 7(3)  | 11(2) | 10(3) |
| C(56) | 24(3) | 37(3) | 29(3) | -1(3) | -2(2) | 12(3) |
| C(61) | 29(3) | 46(4) | 22(3) | 3(3)  | 6(3)  | 5(3)  |
| C(9)  | 26(3) | 44(4) | 45(4) | 28(3) | 17(3) | 12(3) |
| C(49) | 23(3) | 50(4) | 27(3) | 13(3) | 4(2)  | 15(3) |
| C(24) | 36(3) | 34(3) | 31(3) | 2(3)  | 15(3) | 10(3) |
| C(64) | 29(3) | 37(4) | 25(3) | -4(3) | 8(3)  | -1(3) |
| C(4)  | 24(3) | 38(4) | 44(4) | 18(3) | 2(3)  | 14(3) |
| C(31) | 30(3) | 32(3) | 54(4) | 8(3)  | 6(3)  | 17(3) |
| C(37) | 34(3) | 20(3) | 46(4) | 10(3) | -8(3) | 2(3)  |
| C(45) | 23(3) | 71(5) | 30(3) | 15(3) | -1(3) | 12(3) |
| C(26) | 22(3) | 45(4) | 34(3) | 10(3) | 11(3) | 7(3)  |
| C(63) | 48(4) | 29(3) | 28(3) | 2(3)  | 13(3) | 11(3) |
| C(13) | 41(3) | 30(3) | 29(3) | 10(3) | 13(3) | 7(3)  |
| C(62) | 35(3) | 54(4) | 24(3) | 4(3)  | 3(3)  | 13(3) |
| C(36) | 44(4) | 29(3) | 29(3) | 2(3)  | -1(3) | 10(3) |
| C(43) | 18(3) | 51(4) | 37(3) | 20(3) | 6(3)  | 10(3) |
| C(29) | 21(3) | 52(4) | 66(5) | 30(4) | 4(3)  | 16(3) |
| C(48) | 24(3) | 63(4) | 46(4) | 27(3) | 8(3)  | 11(3) |
| C(50) | 26(3) | 48(4) | 33(3) | 12(3) | 2(3)  | 5(3)  |

|       |       |         |        |        |       |       |
|-------|-------|---------|--------|--------|-------|-------|
| C(10) | 39(4) | 57(4)   | 74(5)  | 46(4)  | 36(4) | 30(3) |
| C(40) | 43(4) | 46(4)   | 29(3)  | 7(3)   | 10(3) | 14(3) |
| C(25) | 25(3) | 28(3)   | 53(4)  | -4(3)  | -8(3) | 8(3)  |
| C(66) | 28(3) | 62(4)   | 35(3)  | 12(3)  | 4(3)  | 5(3)  |
| C(78) | 33(3) | 37(4)   | 56(4)  | 17(3)  | 18(3) | 20(3) |
| C(16) | 41(4) | 49(4)   | 35(4)  | 3(3)   | 1(3)  | 7(3)  |
| C(77) | 28(3) | 43(4)   | 64(4)  | 20(3)  | 22(3) | 12(3) |
| C(11) | 58(4) | 32(4)   | 57(5)  | 22(3)  | 40(4) | 21(3) |
| C(68) | 37(4) | 69(5)   | 37(4)  | 9(3)   | -4(3) | -2(3) |
| C(41) | 36(4) | 31(4)   | 68(5)  | 5(3)   | -6(3) | 7(3)  |
| C(67) | 67(5) | 42(4)   | 42(4)  | 11(3)  | 16(3) | 21(3) |
| C(30) | 27(3) | 49(4)   | 70(5)  | 16(4)  | 9(3)  | 18(3) |
| C(12) | 62(5) | 37(4)   | 47(4)  | 12(3)  | 29(3) | 14(3) |
| C(47) | 30(4) | 98(6)   | 54(4)  | 48(4)  | 12(3) | 19(4) |
| C(14) | 22(3) | 80(5)   | 50(4)  | 32(4)  | 4(3)  | 6(3)  |
| C(42) | 59(4) | 66(5)   | 35(4)  | 5(3)   | 15(3) | 24(4) |
| C(46) | 24(3) | 108(6)  | 39(4)  | 35(4)  | 0(3)  | 20(4) |
| C(52) | 33(4) | 78(5)   | 42(4)  | 14(4)  | -8(3) | 1(3)  |
| C(15) | 83(6) | 58(5)   | 99(6)  | 22(5)  | 66(5) | 31(4) |
| C(51) | 41(5) | 180(10) | 126(8) | 122(8) | 1(5)  | 13(5) |

---

Table 5. Hydrogen coordinates ( $\times 10^4$ ) and isotropic displacement parameters ( $\text{\AA}^2 \times 10^{-3}$ ) for Cain58 (**3**).

|        | x     | y     | z    | U(eq) |
|--------|-------|-------|------|-------|
| H(57)  | 2301  | 3245  | 7196 | 30    |
| H(17A) | 5753  | 6176  | 7490 | 29    |
| H(17B) | 4438  | 6387  | 7204 | 29    |
| H(3)   | 5661  | 5343  | 8231 | 32    |
| H(7A)  | 1456  | 6722  | 9021 | 33    |
| H(7B)  | 553   | 5850  | 8529 | 33    |
| H(55)  | 4174  | 4424  | 5953 | 33    |
| H(59A) | 2257  | 5998  | 5818 | 36    |
| H(59B) | 3755  | 6400  | 6134 | 36    |
| H(20)  | 8292  | 8268  | 9527 | 31    |
| H(22)  | 9896  | 7902  | 7983 | 36    |
| H(74)  | -4351 | 3918  | 7634 | 35    |
| H(72)  | -3005 | 1736  | 7949 | 38    |
| H(76A) | -2081 | 5355  | 7474 | 46    |
| H(76B) | -3234 | 4838  | 6929 | 46    |
| H(76C) | -1738 | 4835  | 6849 | 46    |
| H(38)  | 8558  | 9899  | 8047 | 37    |
| H(69A) | 858   | 3931  | 7756 | 30    |
| H(69B) | 498   | 4868  | 7632 | 30    |
| H(33A) | 3275  | 9006  | 8402 | 35    |
| H(33B) | 4085  | 8676  | 7868 | 35    |
| H(5)   | 2706  | 4972  | 9245 | 37    |
| H(56)  | 3886  | 3296  | 6534 | 37    |
| H(24A) | 5172  | 8225  | 8906 | 50    |
| H(24B) | 6053  | 8294  | 9530 | 50    |
| H(24C) | 5276  | 7292  | 9128 | 50    |
| H(64)  | 6165  | 7777  | 4778 | 40    |
| H(4)   | 4698  | 4704  | 8980 | 39    |
| H(31)  | 2269  | 10386 | 7929 | 45    |
| H(26A) | 7839  | 6800  | 7018 | 50    |

|        |       |       |       |    |
|--------|-------|-------|-------|----|
| H(26B) | 8448  | 7884  | 7033  | 50 |
| H(26C) | 6889  | 7491  | 7007  | 50 |
| H(62)  | 2411  | 6864  | 3950  | 46 |
| H(36)  | 7584  | 10906 | 9671  | 42 |
| H(43A) | 79    | 6969  | 6217  | 40 |
| H(43B) | -343  | 7702  | 5861  | 40 |
| H(29)  | -187  | 9168  | 6394  | 52 |
| H(48)  | 3697  | 9904  | 5118  | 50 |
| H(50A) | 3526  | 9131  | 6323  | 54 |
| H(50B) | 4621  | 9300  | 5879  | 54 |
| H(50C) | 3944  | 8260  | 5943  | 54 |
| H(10)  | -2821 | 6199  | 9855  | 57 |
| H(40A) | 5729  | 8900  | 7268  | 58 |
| H(40B) | 7040  | 9595  | 7152  | 58 |
| H(40C) | 5709  | 9934  | 7192  | 58 |
| H(25A) | 10940 | 9073  | 9323  | 57 |
| H(25B) | 11303 | 8203  | 8913  | 57 |
| H(25C) | 10654 | 8082  | 9515  | 57 |
| H(66A) | 5768  | 6308  | 5843  | 63 |
| H(66B) | 6681  | 7255  | 5730  | 63 |
| H(66C) | 6711  | 6269  | 5326  | 63 |
| H(78A) | -566  | 1933  | 7048  | 58 |
| H(78B) | -1113 | 1416  | 7565  | 58 |
| H(78C) | 51    | 2356  | 7740  | 58 |
| H(16A) | 2494  | 6130  | 10390 | 65 |
| H(16B) | 2509  | 7081  | 10850 | 65 |
| H(16C) | 2702  | 7089  | 10159 | 65 |
| H(77A) | -4928 | 2645  | 8550  | 64 |
| H(77B) | -5359 | 1742  | 8008  | 64 |
| H(77C) | -5818 | 2669  | 7949  | 64 |
| H(68A) | 1563  | 4830  | 4455  | 77 |
| H(68B) | 938   | 5526  | 4140  | 77 |
| H(68C) | 1021  | 5620  | 4856  | 77 |
| H(41A) | 10190 | 10348 | 8874  | 70 |
| H(41B) | 9671  | 10172 | 9495  | 70 |
| H(41C) | 10043 | 11209 | 9373  | 70 |

|        |       |       |       |     |
|--------|-------|-------|-------|-----|
| H(67A) | 4138  | 8645  | 4054  | 72  |
| H(67B) | 4258  | 7857  | 3496  | 72  |
| H(67C) | 5539  | 8434  | 3960  | 72  |
| H(30)  | 588   | 10411 | 7197  | 56  |
| H(12)  | 457   | 7323  | 11053 | 57  |
| H(14A) | -1779 | 5697  | 8641  | 74  |
| H(14B) | -2776 | 5009  | 8951  | 74  |
| H(14C) | -1401 | 4794  | 8806  | 74  |
| H(42A) | 4591  | 11201 | 9194  | 78  |
| H(42B) | 5447  | 11112 | 9787  | 78  |
| H(42C) | 4347  | 10224 | 9404  | 78  |
| H(46)  | 223   | 8593  | 4130  | 65  |
| H(52A) | -475  | 6684  | 4874  | 81  |
| H(52B) | -734  | 6927  | 4225  | 81  |
| H(52C) | -1353 | 7400  | 4785  | 81  |
| H(15A) | -2986 | 7231  | 10746 | 111 |
| H(15B) | -1662 | 7889  | 11147 | 111 |
| H(15C) | -2277 | 6879  | 11277 | 111 |
| H(51A) | 1694  | 10542 | 4298  | 160 |
| H(51B) | 1896  | 9768  | 3751  | 160 |
| H(51C) | 3136  | 10395 | 4223  | 160 |

---

## X-RAY OF 6

Table 1. Crystal data and structure refinement for cain100\_0m\_b (6).

|                                   |                                             |                             |
|-----------------------------------|---------------------------------------------|-----------------------------|
| Identification code               | BIII                                        |                             |
| Empirical formula                 | C20 H13 F12 O2 P                            |                             |
| Formula weight                    | 544.27                                      |                             |
| Temperature                       | 100.0 K                                     |                             |
| Wavelength                        | 1.54178 Å                                   |                             |
| Crystal system                    | Monoclinic                                  |                             |
| Space group                       | P 21                                        |                             |
| Unit cell dimensions              | a = 6.4519(4) Å                             | $\alpha = 90^\circ$ .       |
|                                   | b = 14.3030(9) Å                            | $\beta = 92.203(4)^\circ$ . |
|                                   | c = 11.4008(6) Å                            | $\gamma = 90^\circ$ .       |
| Volume                            | 1051.31(11) Å <sup>3</sup>                  |                             |
| Z                                 | 2                                           |                             |
| Density (calculated)              | 1.719 Mg/m <sup>3</sup>                     |                             |
| Absorption coefficient            | 2.334 mm <sup>-1</sup>                      |                             |
| F(000)                            | 544                                         |                             |
| Crystal size                      | 0.29 x 0.26 x 0.23 mm <sup>3</sup>          |                             |
| Theta range for data collection   | 3.880 to 70.023°.                           |                             |
| Index ranges                      | -7 ≤ h ≤ 7, -17 ≤ k ≤ 17, -13 ≤ l ≤ 13      |                             |
| Reflections collected             | 6831                                        |                             |
| Independent reflections           | 3721 [R(int) = 0.0264]                      |                             |
| Completeness to theta = 67.679°   | 97.6 %                                      |                             |
| Absorption correction             | None                                        |                             |
| Max. and min. transmission        | 0.5220 and 0.4062                           |                             |
| Refinement method                 | Full-matrix least-squares on F <sup>2</sup> |                             |
| Data / restraints / parameters    | 3721 / 1 / 333                              |                             |
| Goodness-of-fit on F <sup>2</sup> | 1.086                                       |                             |
| Final R indices [I > 2σ(I)]       | R1 = 0.0508, wR2 = 0.1294                   |                             |
| R indices (all data)              | R1 = 0.0583, wR2 = 0.1345                   |                             |
| Absolute structure parameter      | 0.14(3)                                     |                             |
| Extinction coefficient            | n/a                                         |                             |
| Largest diff. peak and hole       | 0.478 and -0.463 e.Å <sup>-3</sup>          |                             |

Table 2. Atomic coordinates ( $\times 10^4$ ) and equivalent isotropic displacement parameters ( $\text{\AA}^2 \times 10^3$ ) for cain100\_0m\_b (6).  $U(\text{eq})$  is defined as one third of the trace of the orthogonalized  $U^{ij}$  tensor.

|       | x        | y        | z        | $U(\text{eq})$ |
|-------|----------|----------|----------|----------------|
| F(1)  | 5175(18) | 6976(4)  | 6142(6)  | 112(4)         |
| F(2)  | 3119(14) | 8130(4)  | 6482(6)  | 84(3)          |
| F(3)  | 5550(11) | 7759(4)  | 7724(6)  | 62(2)          |
| F(4)  | 685(14)  | 7966(4)  | 8341(5)  | 80(3)          |
| F(5)  | 3006(9)  | 7381(4)  | 9475(4)  | 51(1)          |
| F(6)  | 311(9)   | 6609(5)  | 9080(6)  | 61(2)          |
| F(7)  | 334(10)  | 3373(5)  | 9067(7)  | 70(2)          |
| F(8)  | 2999(9)  | 2549(5)  | 9391(5)  | 62(2)          |
| F(9)  | 504(13)  | 2040(5)  | 8289(5)  | 74(2)          |
| F(10) | 5556(12) | 2277(5)  | 7593(6)  | 71(2)          |
| F(11) | 3089(14) | 1853(4)  | 6444(6)  | 84(3)          |
| F(12) | 4781(15) | 3052(5)  | 5983(5)  | 84(2)          |
| O(1)  | 921(18)  | 6450(7)  | 6835(9)  | 31(3)          |
| O(1') | 1540(40) | 6529(17) | 6550(20) | 32(2)          |
| O(2)  | 770(20)  | 3587(10) | 6825(10) | 30(2)          |
| O(2') | 1360(50) | 3490(20) | 6550(30) | 30(2)          |
| C(2)  | 1325(6)  | 5050(9)  | 5146(3)  | 36(1)          |
| C(3)  | 3350(6)  | 5035(9)  | 4785(3)  | 39(1)          |
| C(4)  | 3750(6)  | 5024(9)  | 3599(3)  | 34(1)          |
| C(5)  | 2150(6)  | 4991(7)  | 2747(3)  | 28(1)          |
| C(6)  | 141(6)   | 5005(8)  | 3115(3)  | 32(1)          |
| C(7)  | -280(6)  | 5012(8)  | 4298(3)  | 32(1)          |
| C(8)  | 2618(7)  | 5001(9)  | 1462(3)  | 37(1)          |
| C(9)  | 2599(13) | 3261(6)  | 7506(7)  | 31(2)          |
| C(10) | 4030(20) | 2603(7)  | 6873(8)  | 53(2)          |
| C(11) | 1621(15) | 2792(6)  | 8575(8)  | 36(2)          |
| C(12) | 2871(5)  | 4995(7)  | 7548(3)  | 20(1)          |
| C(13) | 3709(12) | 4155(5)  | 7903(6)  | 22(2)          |
| C(14) | 5524(12) | 4142(5)  | 8651(6)  | 24(2)          |
| C(15) | 6415(6)  | 4979(8)  | 8995(3)  | 30(1)          |
| C(16) | 5554(13) | 5817(6)  | 8658(7)  | 30(2)          |

|       |          |          |          |       |
|-------|----------|----------|----------|-------|
| C(17) | 3790(12) | 5833(5)  | 7960(6)  | 23(1) |
| C(18) | 2662(14) | 6713(6)  | 7561(6)  | 32(2) |
| C(19) | 1655(14) | 7187(6)  | 8613(7)  | 33(2) |
| C(20) | 4130(20) | 7403(7)  | 6970(7)  | 55(3) |
| P(1') | 505(9)   | 4798(5)  | 6673(5)  | 22(1) |
| P(1)  | 496(6)   | 5280(3)  | 6649(3)  | 22(1) |
| C(1)  | -110(30) | 2882(12) | 5942(15) | 65(4) |
| C(1') | -20(30)  | 7134(15) | 6016(16) | 23(1) |

---



Table 3. Bond lengths [Å] and angles [°] for cain100\_0m\_b (6).

---

|             |           |
|-------------|-----------|
| F(1)-C(20)  | 1.328(12) |
| F(2)-C(20)  | 1.337(12) |
| F(3)-C(20)  | 1.334(13) |
| F(4)-C(19)  | 1.309(10) |
| F(5)-C(19)  | 1.318(9)  |
| F(6)-C(19)  | 1.325(12) |
| F(7)-C(11)  | 1.316(12) |
| F(8)-C(11)  | 1.308(9)  |
| F(9)-C(11)  | 1.329(10) |
| F(10)-C(10) | 1.341(13) |
| F(11)-C(10) | 1.317(11) |
| F(12)-C(10) | 1.310(12) |
| O(1)-C(18)  | 1.421(13) |
| O(1')-C(18) | 1.37(2)   |
| O(1')-P(1)  | 1.91(2)   |
| O(1')-C(1') | 1.44(3)   |
| O(2)-C(9)   | 1.463(16) |
| O(2)-P(1')  | 1.749(16) |
| O(2)-C(1)   | 1.520(19) |
| O(2')-C(9)  | 1.36(3)   |
| C(2)-C(3)   | 1.385(6)  |
| C(2)-C(7)   | 1.390(5)  |
| C(2)-P(1')  | 1.874(7)  |
| C(2)-P(1)   | 1.844(6)  |
| C(3)-H(3)   | 0.9500    |
| C(3)-C(4)   | 1.387(5)  |
| C(4)-H(4)   | 0.9500    |
| C(4)-C(5)   | 1.391(6)  |
| C(5)-C(6)   | 1.378(6)  |
| C(5)-C(8)   | 1.508(5)  |
| C(6)-H(6)   | 0.9500    |
| C(6)-C(7)   | 1.385(5)  |
| C(7)-H(7)   | 0.9500    |
| C(8)-H(8A)  | 0.9800    |

|                   |           |
|-------------------|-----------|
| C(8)-H(8B)        | 0.9800    |
| C(8)-H(8C)        | 0.9800    |
| C(9)-C(10)        | 1.520(14) |
| C(9)-C(11)        | 1.548(12) |
| C(9)-C(13)        | 1.526(10) |
| C(12)-C(13)       | 1.372(11) |
| C(12)-C(17)       | 1.410(11) |
| C(12)-P(1')       | 1.814(7)  |
| C(12)-P(1)        | 1.856(6)  |
| C(13)-C(14)       | 1.422(11) |
| C(14)-H(14)       | 0.9500    |
| C(14)-C(15)       | 1.379(13) |
| C(15)-H(15)       | 0.9500    |
| C(15)-C(16)       | 1.370(13) |
| C(16)-H(16)       | 0.9500    |
| C(16)-C(17)       | 1.364(11) |
| C(17)-C(18)       | 1.515(10) |
| C(18)-C(19)       | 1.542(11) |
| C(18)-C(20)       | 1.541(14) |
| C(1)-H(1A)        | 0.9800    |
| C(1)-H(1B)        | 0.9800    |
| C(1)-H(1C)        | 0.9800    |
| C(1')-H(1'A)      | 0.9800    |
| C(1')-H(1'B)      | 0.9800    |
| C(1')-H(1'C)      | 0.9800    |
|                   |           |
| C(18)-O(1')-P(1)  | 107.8(15) |
| C(18)-O(1')-C(1') | 125(2)    |
| C(1')-O(1')-P(1)  | 110.2(16) |
| C(9)-O(2)-P(1')   | 116.2(9)  |
| C(9)-O(2)-C(1)    | 114.5(11) |
| C(1)-O(2)-P(1')   | 124.0(11) |
| C(3)-C(2)-C(7)    | 118.6(4)  |
| C(3)-C(2)-P(1')   | 125.1(4)  |
| C(3)-C(2)-P(1)    | 126.1(4)  |
| C(7)-C(2)-P(1')   | 114.1(4)  |

|                   |           |
|-------------------|-----------|
| C(7)-C(2)-P(1)    | 114.7(4)  |
| C(2)-C(3)-H(3)    | 119.9     |
| C(2)-C(3)-C(4)    | 120.2(4)  |
| C(4)-C(3)-H(3)    | 119.9     |
| C(3)-C(4)-H(4)    | 119.3     |
| C(3)-C(4)-C(5)    | 121.4(4)  |
| C(5)-C(4)-H(4)    | 119.3     |
| C(4)-C(5)-C(8)    | 120.5(4)  |
| C(6)-C(5)-C(4)    | 117.9(3)  |
| C(6)-C(5)-C(8)    | 121.5(4)  |
| C(5)-C(6)-H(6)    | 119.4     |
| C(5)-C(6)-C(7)    | 121.2(4)  |
| C(7)-C(6)-H(6)    | 119.4     |
| C(2)-C(7)-H(7)    | 119.7     |
| C(6)-C(7)-C(2)    | 120.6(4)  |
| C(6)-C(7)-H(7)    | 119.7     |
| C(5)-C(8)-H(8A)   | 109.5     |
| C(5)-C(8)-H(8B)   | 109.5     |
| C(5)-C(8)-H(8C)   | 109.5     |
| H(8A)-C(8)-H(8B)  | 109.5     |
| H(8A)-C(8)-H(8C)  | 109.5     |
| H(8B)-C(8)-H(8C)  | 109.5     |
| O(2)-C(9)-C(10)   | 116.0(8)  |
| O(2)-C(9)-C(11)   | 102.2(8)  |
| O(2)-C(9)-C(13)   | 104.5(8)  |
| O(2')-C(9)-C(10)  | 96.9(13)  |
| O(2')-C(9)-C(11)  | 119.3(15) |
| O(2')-C(9)-C(13)  | 106.7(16) |
| C(10)-C(9)-C(11)  | 112.2(7)  |
| C(10)-C(9)-C(13)  | 111.9(8)  |
| C(13)-C(9)-C(11)  | 109.3(6)  |
| F(10)-C(10)-C(9)  | 111.7(7)  |
| F(11)-C(10)-F(10) | 105.2(8)  |
| F(11)-C(10)-C(9)  | 113.7(10) |
| F(12)-C(10)-F(10) | 111.1(11) |
| F(12)-C(10)-F(11) | 106.8(8)  |

|                   |           |
|-------------------|-----------|
| F(12)-C(10)-C(9)  | 108.3(8)  |
| F(7)-C(11)-F(9)   | 105.7(9)  |
| F(7)-C(11)-C(9)   | 110.1(7)  |
| F(8)-C(11)-F(7)   | 106.7(8)  |
| F(8)-C(11)-F(9)   | 107.9(8)  |
| F(8)-C(11)-C(9)   | 112.9(8)  |
| F(9)-C(11)-C(9)   | 113.0(7)  |
| C(13)-C(12)-C(17) | 119.4(3)  |
| C(13)-C(12)-P(1') | 109.9(6)  |
| C(13)-C(12)-P(1)  | 131.5(6)  |
| C(17)-C(12)-P(1') | 130.5(7)  |
| C(17)-C(12)-P(1)  | 109.0(6)  |
| C(12)-C(13)-C(9)  | 118.1(7)  |
| C(12)-C(13)-C(14) | 119.6(6)  |
| C(14)-C(13)-C(9)  | 122.3(7)  |
| C(13)-C(14)-H(14) | 120.5     |
| C(15)-C(14)-C(13) | 119.0(7)  |
| C(15)-C(14)-H(14) | 120.5     |
| C(14)-C(15)-H(15) | 119.3     |
| C(16)-C(15)-C(14) | 121.3(4)  |
| C(16)-C(15)-H(15) | 119.3     |
| C(15)-C(16)-H(16) | 120.0     |
| C(17)-C(16)-C(15) | 119.9(8)  |
| C(17)-C(16)-H(16) | 120.0     |
| C(12)-C(17)-C(18) | 114.6(6)  |
| C(16)-C(17)-C(12) | 120.7(7)  |
| C(16)-C(17)-C(18) | 124.7(7)  |
| O(1)-C(18)-C(17)  | 108.3(7)  |
| O(1)-C(18)-C(19)  | 102.8(8)  |
| O(1)-C(18)-C(20)  | 113.6(8)  |
| O(1')-C(18)-C(17) | 109.1(12) |
| O(1')-C(18)-C(19) | 121.1(12) |
| O(1')-C(18)-C(20) | 94.0(11)  |
| C(17)-C(18)-C(19) | 110.1(6)  |
| C(17)-C(18)-C(20) | 111.5(8)  |
| C(20)-C(18)-C(19) | 110.1(7)  |

|                     |           |
|---------------------|-----------|
| F(4)-C(19)-F(5)     | 107.1(7)  |
| F(4)-C(19)-F(6)     | 108.2(9)  |
| F(4)-C(19)-C(18)    | 113.7(7)  |
| F(5)-C(19)-F(6)     | 104.8(8)  |
| F(5)-C(19)-C(18)    | 112.7(7)  |
| F(6)-C(19)-C(18)    | 109.9(7)  |
| F(1)-C(20)-F(2)     | 108.4(8)  |
| F(1)-C(20)-F(3)     | 106.2(12) |
| F(1)-C(20)-C(18)    | 110.8(8)  |
| F(2)-C(20)-C(18)    | 112.4(11) |
| F(3)-C(20)-F(2)     | 106.4(8)  |
| F(3)-C(20)-C(18)    | 112.4(7)  |
| O(2)-P(1')-C(2)     | 104.6(7)  |
| O(2)-P(1')-C(12)    | 91.3(6)   |
| C(12)-P(1')-C(2)    | 102.7(4)  |
| C(2)-P(1)-O(1')     | 89.7(8)   |
| C(2)-P(1)-C(12)     | 102.2(3)  |
| C(12)-P(1)-O(1')    | 87.3(8)   |
| O(2)-C(1)-H(1A)     | 109.5     |
| O(2)-C(1)-H(1B)     | 109.5     |
| O(2)-C(1)-H(1C)     | 109.5     |
| H(1A)-C(1)-H(1B)    | 109.5     |
| H(1A)-C(1)-H(1C)    | 109.5     |
| H(1B)-C(1)-H(1C)    | 109.5     |
| O(1')-C(1')-H(1'A)  | 109.5     |
| O(1')-C(1')-H(1'B)  | 109.5     |
| O(1')-C(1')-H(1'C)  | 109.5     |
| H(1'A)-C(1')-H(1'B) | 109.5     |
| H(1'A)-C(1')-H(1'C) | 109.5     |
| H(1'B)-C(1')-H(1'C) | 109.5     |

---

Symmetry transformations used to generate equivalent atoms:

Table 4. Anisotropic displacement parameters ( $\text{\AA}^2 \times 10^3$ ) for cain100\_0m\_b (6). The anisotropic displacement factor exponent takes the form:  $-2\pi^2 [ h^2 a^{*2} U^{11} + \dots + 2 h k a^* b^* U^{12} ]$

|       | U <sup>11</sup> | U <sup>22</sup> | U <sup>33</sup> | U <sup>23</sup> | U <sup>13</sup> | U <sup>12</sup> |
|-------|-----------------|-----------------|-----------------|-----------------|-----------------|-----------------|
| F(1)  | 231(10)         | 35(4)           | 79(4)           | 18(3)           | 99(6)           | 16(4)           |
| F(2)  | 171(9)          | 20(3)           | 58(4)           | 11(3)           | -26(4)          | 10(4)           |
| F(3)  | 63(4)           | 40(3)           | 85(4)           | 17(3)           | 12(3)           | -12(3)          |
| F(4)  | 139(7)          | 49(4)           | 51(3)           | -18(3)          | -19(4)          | 63(4)           |
| F(5)  | 39(3)           | 80(4)           | 33(2)           | -23(2)          | -6(2)           | 1(3)            |
| F(6)  | 37(3)           | 54(4)           | 94(5)           | -33(3)          | 25(3)           | -3(3)           |
| F(7)  | 43(4)           | 64(4)           | 105(5)          | 38(4)           | 32(4)           | 6(3)            |
| F(8)  | 38(3)           | 88(5)           | 60(3)           | 52(3)           | -15(2)          | -10(3)          |
| F(9)  | 108(6)          | 62(4)           | 53(3)           | 20(3)           | -8(3)           | -54(4)          |
| F(10) | 70(5)           | 54(4)           | 88(4)           | -31(3)          | 0(3)            | 23(3)           |
| F(11) | 165(9)          | 31(3)           | 53(3)           | -8(3)           | -23(4)          | -20(4)          |
| F(12) | 153(7)          | 46(4)           | 57(3)           | -10(3)          | 49(4)           | -1(3)           |
| O(1)  | 34(6)           | 26(5)           | 32(5)           | -13(4)          | -14(4)          | 13(4)           |
| O(1') | 40(5)           | 27(4)           | 29(3)           | -8(3)           | -10(3)          | 4(3)            |
| O(2)  | 37(7)           | 26(4)           | 27(6)           | 5(4)            | -10(4)          | -8(5)           |
| O(2') | 37(7)           | 26(4)           | 27(6)           | 5(4)            | -10(4)          | -8(5)           |
| C(2)  | 25(2)           | 63(4)           | 18(2)           | 4(4)            | -2(1)           | -3(4)           |
| C(3)  | 25(2)           | 69(4)           | 21(2)           | -1(4)           | -4(2)           | 5(5)            |
| C(4)  | 26(2)           | 47(3)           | 28(2)           | 0(4)            | 4(2)            | 4(4)            |
| C(5)  | 40(2)           | 23(2)           | 21(2)           | 1(3)            | 1(2)            | -1(4)           |
| C(6)  | 35(2)           | 36(2)           | 23(2)           | -10(4)          | -8(2)           | 3(4)            |
| C(7)  | 23(2)           | 48(3)           | 24(2)           | -1(4)           | -3(1)           | -6(4)           |
| C(8)  | 46(3)           | 42(3)           | 24(2)           | 3(4)            | 2(2)            | -1(5)           |
| C(9)  | 38(5)           | 21(4)           | 33(3)           | 4(3)            | -10(3)          | -10(3)          |
| C(10) | 85(8)           | 24(5)           | 50(5)           | -8(4)           | 6(4)            | 1(5)            |
| C(11) | 31(5)           | 29(5)           | 47(4)           | 8(3)            | -9(3)           | -9(3)           |
| C(12) | 21(2)           | 23(2)           | 16(2)           | 0(3)            | 2(1)            | -3(4)           |
| C(13) | 26(4)           | 22(4)           | 19(3)           | 0(2)            | 4(2)            | 1(3)            |
| C(14) | 26(4)           | 22(4)           | 23(3)           | 3(3)            | -2(3)           | 5(3)            |
| C(15) | 26(2)           | 37(2)           | 25(2)           | -2(4)           | -9(1)           | 15(4)           |
| C(16) | 27(4)           | 28(4)           | 33(4)           | -3(3)           | -3(3)           | -3(3)           |

|       |        |       |       |        |        |        |
|-------|--------|-------|-------|--------|--------|--------|
| C(17) | 26(4)  | 18(4) | 24(3) | -2(2)  | -2(2)  | 4(3)   |
| C(18) | 40(5)  | 27(4) | 29(3) | -8(3)  | -10(3) | 4(3)   |
| C(19) | 29(4)  | 32(5) | 37(4) | -17(3) | -14(3) | 7(3)   |
| C(20) | 107(9) | 27(5) | 32(4) | 4(4)   | 6(4)   | 12(5)  |
| P(1') | 19(1)  | 26(1) | 19(1) | -5(2)  | -2(1)  | 2(2)   |
| P(1)  | 19(1)  | 26(1) | 19(1) | -5(2)  | -2(1)  | 2(2)   |
| C(1)  | 61(8)  | 57(7) | 76(8) | -12(6) | -20(6) | -31(6) |
| C(1') | 26(4)  | 18(4) | 24(3) | -2(2)  | -2(2)  | 4(3)   |

---

Table 5. Hydrogen coordinates ( $\times 10^4$ ) and isotropic displacement parameters ( $\text{\AA}^2 \times 10^{-3}$ ) for cain100\_0m\_b (6).

|        | x     | y    | z    | U(eq) |
|--------|-------|------|------|-------|
| H(3)   | 4468  | 5031 | 5352 | 46    |
| H(4)   | 5146  | 5040 | 3363 | 40    |
| H(6)   | -977  | 5009 | 2548 | 38    |
| H(7)   | -1676 | 4990 | 4531 | 38    |
| H(8A)  | 2789  | 5648 | 1201 | 56    |
| H(8B)  | 1470  | 4709 | 1008 | 56    |
| H(8C)  | 3899  | 4651 | 1341 | 56    |
| H(14)  | 6113  | 3566 | 8910 | 29    |
| H(15)  | 7650  | 4975 | 9476 | 36    |
| H(16)  | 6185  | 6387 | 8910 | 35    |
| H(1A)  | 665   | 2914 | 5221 | 98    |
| H(1B)  | -1575 | 3026 | 5761 | 98    |
| H(1C)  | 3     | 2251 | 6274 | 98    |
| H(1'A) | -593  | 7538 | 6618 | 34    |
| H(1'B) | -1137 | 6754 | 5653 | 34    |
| H(1'C) | 604   | 7521 | 5415 | 34    |
